# Supplementary material
Source: PubMed Central journal article supplement (PMC11027606)
Supplement: 262_2020_2595_MOESM1_ESM.pdf [file 262_2020_2595_MOESM1_ESM.pdf]

## **A gene expression based immune signature for lung adenocarcinoma prognosis**

### **Supplementary Tables**

**Supplementary Table 1. Lung adenocarcinoma microarray datasets used in the validation stage.**

| <b>Platform</b> | <b>GEO ID</b> | <b>Samples</b> | <b>LUAD</b> | <b>Stage I</b> | <b>Stage II</b> | <b>Stage III</b> | <b>Stage IV</b> | <b>Smoking Status</b> |
|-----------------|---------------|----------------|-------------|----------------|-----------------|------------------|-----------------|-----------------------|
|                 | GSE31210      | 246            | 226         | 168            | 58              | 0                | 0               | Y                     |
|                 | GSE50081      | 181            | 127         | 92             | 35              | 0                | 0               | Y                     |
| GPL570          | GSE30219      | 307            | 85          | 71             | 12              | 2                | 0               | N                     |
|                 | GSE3141       | 111            | 58          |                |                 | N                |                 | N                     |
|                 | GSE8894       | 138            | 63          |                |                 | N                |                 | N                     |

**Supplementary Table 2. 4479 overlapped significant DEGs (FDR<0.05) in two designs.**

| Gene    | Independent sample design |           | Paired sample design |           |
|---------|---------------------------|-----------|----------------------|-----------|
|         | logFC                     | FDR       | logFC                | FDR       |
| STX11   | 3.02                      | 2.07E-175 | 3.04                 | 5.53E-79  |
| ACVRL1  | 2.58                      | 3.16E-164 | 2.31                 | 1.68E-78  |
| S1PR1   | 2.82                      | 1.58E-163 | 2.57                 | 5.98E-83  |
| PECAM1  | 2.19                      | 9.01E-160 | 2.08                 | 2.45E-106 |
| TEK     | 3.31                      | 2.80E-149 | 3.16                 | 1.58E-92  |
| RAMP3   | 3.18                      | 5.38E-148 | 3.18                 | 1.21E-74  |
| EPAS1   | 2.59                      | 1.29E-140 | 2.57                 | 9.10E-90  |
| RAMP2   | 2.80                      | 3.11E-130 | 2.76                 | 5.27E-105 |
| SH2D3C  | 2.28                      | 2.79E-123 | 2.15                 | 8.23E-67  |
| SDPR    | 3.29                      | 4.32E-123 | 3.23                 | 4.37E-66  |
| TAL1    | 2.83                      | 5.44E-123 | 2.82                 | 4.76E-95  |
| GIMAP8  | 2.49                      | 1.42E-121 | 2.29                 | 1.16E-53  |
| EDNRB   | 3.40                      | 8.19E-121 | 3.57                 | 3.23E-88  |
| FCN3    | 4.55                      | 9.92E-120 | 5.07                 | 3.94E-50  |
| CALCRL  | 2.78                      | 2.06E-119 | 2.48                 | 1.85E-67  |
| CDH5    | 2.48                      | 1.63E-118 | 2.28                 | 1.38E-69  |
| FOXF1   | 2.70                      | 1.05E-114 | 2.48                 | 2.19E-60  |
| FHL1    | 3.38                      | 1.69E-114 | 3.52                 | 9.98E-114 |
| HBA2    | 4.40                      | 1.10E-111 | 4.03                 | 5.75E-51  |
| LYVE1   | 3.26                      | 6.02E-108 | 2.97                 | 2.07E-45  |
| AGER    | 5.01                      | 9.16E-106 | 6.79                 | 4.47E-71  |
| ADRB2   | 3.10                      | 3.41E-105 | 3.34                 | 3.28E-67  |
| PTPRB   | 2.67                      | 1.39E-104 | 2.69                 | 6.56E-75  |
| CLEC1A  | 2.35                      | 2.20E-104 | 2.19                 | 2.02E-55  |
| CD101   | 2.79                      | 1.35E-101 | 2.60                 | 7.72E-38  |
| TMEM100 | 4.34                      | 2.98E-101 | 4.76                 | 3.81E-53  |
| GPIHBP1 | 3.86                      | 1.97E-100 | 4.09                 | 9.58E-69  |
| JAM2    | 2.37                      | 6.31E-100 | 2.32                 | 5.11E-87  |
| LRRC32  | 2.24                      | 6.56E-99  | 1.92                 | 3.87E-31  |
| CLEC14A | 2.23                      | 1.09E-97  | 2.13                 | 1.49E-60  |
| GYPE    | 3.33                      | 1.10E-97  | 3.54                 | 2.56E-72  |
| SLC6A4  | 6.39                      | 2.60E-97  | 8.54                 | 8.61E-74  |
| VIPR1   | 3.29                      | 4.11E-97  | 3.65                 | 1.01E-48  |
| CD93    | 2.22                      | 1.96E-96  | 1.81                 | 1.67E-38  |
| PRKCE   | 1.87                      | 4.07E-95  | 1.85                 | 1.97E-65  |
| PYCR1   | -3.82                     | 7.95E-95  | -3.75                | 1.44E-134 |
| STARD13 | 2.01                      | 1.87E-94  | 1.86                 | 1.09E-61  |
| SGCG    | 4.01                      | 1.44E-93  | 4.40                 | 8.41E-87  |
| ANGPT4  | 4.73                      | 2.98E-92  | 4.57                 | 1.68E-61  |

|          |       |          |       |          |
|----------|-------|----------|-------|----------|
| HBB      | 4.52  | 4.09E-92 | 3.98  | 2.76E-45 |
| FPR2     | 3.37  | 8.04E-92 | 2.69  | 1.07E-35 |
| SMAD6    | 2.52  | 2.84E-91 | 2.52  | 4.63E-41 |
| ERG      | 2.12  | 1.38E-90 | 1.94  | 7.51E-66 |
| GPD1     | 4.11  | 1.38E-90 | 5.07  | 2.26E-57 |
| ANGPTL7  | 4.77  | 1.67E-90 | 5.06  | 9.04E-50 |
| GIMAP6   | 2.13  | 7.54E-90 | 1.95  | 5.89E-41 |
| CAV1     | 3.27  | 1.10E-89 | 3.69  | 1.76E-89 |
| PTRF     | 2.02  | 5.85E-87 | 1.77  | 8.13E-46 |
| CSRNP1   | 2.26  | 9.74E-87 | 2.00  | 3.82E-37 |
| GLIPR2   | 2.24  | 1.37E-86 | 2.05  | 1.01E-59 |
| AOC3     | 2.54  | 1.94E-86 | 2.35  | 5.19E-65 |
| LMO2     | 1.91  | 2.91E-86 | 1.78  | 7.01E-49 |
| BMPR2    | 1.29  | 5.02E-84 | 1.10  | 2.05E-25 |
| BTNL9    | 3.47  | 9.46E-84 | 4.30  | 1.47E-77 |
| HEG1     | 2.09  | 1.32E-83 | 1.73  | 2.23E-32 |
| NLRC4    | 2.29  | 6.79E-83 | 2.17  | 2.83E-41 |
| SPTBN1   | 1.65  | 8.31E-82 | 1.50  | 6.97E-50 |
| PKHD1L1  | 3.47  | 5.11E-81 | 3.49  | 2.77E-40 |
| CD5L     | 4.31  | 6.59E-81 | 4.83  | 3.55E-49 |
| JPH4     | 2.61  | 1.47E-80 | 2.79  | 4.03E-72 |
| SOX17    | 2.68  | 1.62E-80 | 2.45  | 2.68E-37 |
| FGFBP2   | 3.56  | 1.93E-80 | 3.83  | 1.82E-50 |
| ALAS2    | 5.08  | 1.32E-78 | 3.55  | 9.24E-33 |
| SIRPB1   | 2.60  | 2.59E-78 | 2.30  | 1.15E-49 |
| CD300LG  | 5.17  | 3.65E-78 | 6.10  | 6.28E-58 |
| TNNC1    | 3.53  | 4.25E-78 | 4.81  | 2.99E-62 |
| CAT      | 1.79  | 6.17E-78 | 1.95  | 7.61E-61 |
| TCF21    | 3.07  | 1.30E-76 | 3.33  | 2.62E-87 |
| TRPV2    | 1.93  | 5.29E-76 | 1.77  | 1.35E-40 |
| PDLIM2   | 1.76  | 8.49E-76 | 1.78  | 9.05E-50 |
| HBEGF    | 2.58  | 2.08E-74 | 2.28  | 6.93E-38 |
| ARHGAP31 | 2.11  | 1.70E-72 | 2.03  | 1.05E-59 |
| ADARB1   | 1.74  | 2.71E-72 | 1.60  | 1.51E-33 |
| TGFBR3   | 2.58  | 6.91E-72 | 2.71  | 1.36E-50 |
| ADCY4    | 1.96  | 8.11E-72 | 1.95  | 6.49E-43 |
| HPS5     | 1.13  | 9.93E-72 | 0.95  | 1.13E-31 |
| PPP1R15A | 1.75  | 1.41E-71 | 1.73  | 9.01E-47 |
| FGR      | 2.16  | 2.75E-71 | 2.10  | 1.27E-47 |
| SRPK1    | -1.74 | 3.93E-71 | -1.73 | 1.45E-84 |
| CLEC4M   | 4.90  | 4.71E-71 | 4.48  | 4.06E-27 |
| TMEM204  | 1.90  | 6.02E-71 | 1.54  | 1.07E-30 |
| TNS1     | 2.04  | 7.74E-71 | 2.19  | 3.20E-54 |

|          |       |          |       |          |
|----------|-------|----------|-------|----------|
| ALDH18A1 | -1.72 | 1.03E-69 | -1.83 | 4.63E-86 |
| ANGPTL1  | 2.75  | 1.54E-69 | 2.83  | 1.62E-60 |
| FLI1     | 1.71  | 3.25E-68 | 1.53  | 6.96E-34 |
| CHRM1    | 4.54  | 6.83E-68 | 5.43  | 1.58E-46 |
| THBD     | 2.34  | 1.20E-67 | 2.17  | 6.93E-71 |
| NDST1    | 1.46  | 7.49E-67 | 1.34  | 6.04E-42 |
| ETV4     | -4.27 | 8.53E-67 | -3.60 | 1.91E-73 |
| SIGLEC11 | 2.62  | 1.11E-66 | 2.95  | 1.89E-29 |
| OVCH1    | 4.96  | 1.12E-66 | 5.56  | 2.42E-46 |
| SPN      | 2.26  | 1.63E-66 | 2.29  | 2.30E-44 |
| HBA1     | 4.71  | 2.26E-66 | 4.81  | 2.97E-30 |
| RCAN1    | 1.77  | 5.41E-66 | 1.39  | 1.94E-27 |
| LTBP4    | 2.11  | 7.32E-66 | 2.13  | 2.06E-55 |
| NMUR1    | 2.56  | 1.09E-65 | 2.97  | 8.37E-72 |
| ADPRH    | 1.54  | 1.31E-65 | 1.38  | 7.35E-49 |
| CLDN5    | 2.68  | 1.84E-65 | 2.82  | 5.41E-64 |
| PDE5A    | 1.82  | 3.68E-65 | 1.53  | 1.30E-35 |
| TIE1     | 1.91  | 4.32E-65 | 1.75  | 4.07E-49 |
| MYOC     | 4.60  | 4.90E-65 | 5.26  | 1.09E-66 |
| IL3RA    | 1.78  | 5.78E-65 | 1.71  | 8.03E-46 |
| MGAT3    | 3.07  | 6.36E-65 | 3.77  | 3.79E-68 |
| ITLN1    | 5.38  | 1.33E-64 | 4.71  | 9.79E-22 |
| LAMP3    | 2.70  | 3.25E-64 | 3.23  | 4.51E-46 |
| VWF      | 2.24  | 3.25E-64 | 2.06  | 3.77E-29 |
| PRAM1    | 2.38  | 7.42E-64 | 2.50  | 7.95E-42 |
| GOLM1    | -2.68 | 8.76E-64 | -2.74 | 7.15E-89 |
| LDLR     | 1.98  | 1.32E-63 | 1.88  | 1.83E-27 |
| TGM1     | 2.63  | 2.00E-63 | 3.29  | 3.97E-74 |
| CA4      | 4.31  | 5.22E-63 | 6.43  | 1.62E-58 |
| GYPC     | 1.71  | 6.53E-63 | 1.59  | 4.78E-48 |
| WFS1     | 1.58  | 7.07E-63 | 1.55  | 1.61E-46 |
| RASGRP4  | 2.14  | 7.32E-63 | 2.11  | 1.08E-43 |
| C5AR1    | 2.03  | 1.05E-62 | 1.71  | 2.82E-27 |
| VSIG4    | 2.50  | 1.11E-62 | 2.39  | 1.65E-29 |
| MFAP4    | 2.58  | 2.86E-62 | 2.63  | 5.02E-46 |
| GIMAP5   | 1.93  | 3.31E-62 | 1.88  | 8.22E-32 |
| DNASE1L3 | 3.62  | 1.12E-61 | 3.87  | 9.77E-34 |
| CD36     | 3.04  | 1.84E-61 | 3.33  | 3.96E-60 |
| OSCAR    | 2.28  | 3.54E-61 | 2.27  | 2.58E-45 |
| CD52     | 2.35  | 5.39E-61 | 2.46  | 3.57E-43 |
| TOP2A    | -4.10 | 6.27E-61 | -3.98 | 4.02E-58 |
| TGFBR2   | 1.59  | 1.47E-60 | 1.47  | 3.56E-43 |
| OLR1     | 2.60  | 2.04E-60 | 2.87  | 2.20E-37 |

|          |       |          |       |          |
|----------|-------|----------|-------|----------|
| UBE2T    | -3.59 | 2.76E-60 | -3.37 | 2.75E-62 |
| MSR1     | 2.39  | 8.27E-60 | 2.29  | 8.07E-32 |
| NPR1     | 2.51  | 1.45E-59 | 2.93  | 6.62E-76 |
| GIMAP7   | 1.83  | 1.56E-59 | 1.79  | 1.70E-34 |
| CFP      | 2.27  | 1.63E-59 | 2.29  | 1.21E-49 |
| CASP12   | 2.78  | 2.59E-58 | 3.04  | 3.91E-38 |
| RECQL4   | -3.50 | 1.32E-57 | -2.92 | 1.17E-48 |
| SYNPO    | 1.66  | 2.33E-57 | 1.60  | 7.99E-42 |
| CD300C   | 2.17  | 7.38E-57 | 1.96  | 2.66E-35 |
| CD34     | 1.58  | 9.43E-57 | 1.29  | 3.50E-27 |
| UHRF1    | -3.62 | 9.62E-57 | -3.71 | 3.58E-51 |
| HYAL2    | 1.24  | 1.69E-56 | 1.08  | 2.00E-31 |
| TUBB3    | -4.32 | 2.00E-56 | -4.36 | 2.19E-76 |
| B3GNT3   | -4.44 | 2.34E-56 | -4.33 | 3.70E-65 |
| F8       | 1.65  | 3.50E-56 | 1.50  | 7.67E-29 |
| BCL6B    | 1.69  | 4.68E-56 | 1.60  | 3.35E-36 |
| PPP1R14B | -2.22 | 7.98E-56 | -2.02 | 2.17E-69 |
| KIF4A    | -4.29 | 8.91E-56 | -4.38 | 7.95E-50 |
| SEMA5A   | 2.45  | 1.29E-55 | 2.47  | 4.04E-45 |
| SELP     | 2.33  | 1.34E-55 | 2.44  | 4.81E-34 |
| DKK2     | 2.32  | 2.60E-55 | 2.23  | 1.17E-32 |
| MARCO    | 3.04  | 2.85E-55 | 3.42  | 3.10E-35 |
| KLF4     | 2.34  | 4.77E-55 | 2.13  | 1.26E-30 |
| KIF20A   | -3.52 | 2.65E-54 | -3.68 | 9.22E-59 |
| SPTBN2   | -2.70 | 2.83E-54 | -2.59 | 3.62E-44 |
| RNF144B  | 1.68  | 2.95E-54 | 1.51  | 2.40E-34 |
| MFNG     | 1.55  | 3.10E-54 | 1.65  | 5.41E-49 |
| RECK     | 1.59  | 4.57E-54 | 1.36  | 8.54E-26 |
| LGR4     | -2.84 | 5.03E-54 | -2.73 | 7.57E-60 |
| PI16     | 3.88  | 1.10E-53 | 4.33  | 7.04E-42 |
| GIMAP1   | 1.74  | 1.64E-53 | 1.69  | 3.43E-31 |
| RAD54L   | -3.81 | 2.39E-53 | -3.45 | 1.71E-49 |
| SLC19A3  | 2.89  | 4.19E-53 | 3.62  | 3.98E-64 |
| CXCR2    | 2.72  | 4.20E-53 | 2.20  | 2.97E-27 |
| CDC25C   | -4.29 | 5.34E-53 | -4.36 | 1.24E-61 |
| EZH2     | -2.83 | 6.64E-53 | -2.57 | 4.50E-43 |
| BUB1B    | -3.79 | 7.54E-53 | -3.83 | 4.92E-55 |
| COX7A1   | 1.91  | 7.90E-53 | 1.71  | 9.63E-32 |
| SFTPC    | 4.93  | 1.07E-52 | 7.28  | 1.87E-30 |
| SH2D4B   | 2.45  | 1.08E-52 | 2.78  | 1.01E-50 |
| CCL14    | 2.68  | 1.56E-52 | 2.47  | 4.25E-22 |
| ACP5     | 1.80  | 1.74E-52 | 1.82  | 1.00E-35 |
| NEK2     | -3.86 | 1.75E-52 | -3.91 | 1.50E-40 |

|         |       |          |       |          |
|---------|-------|----------|-------|----------|
| CDC6    | -3.73 | 2.47E-52 | -3.43 | 2.85E-52 |
| KIF2C   | -4.00 | 2.92E-52 | -3.95 | 7.11E-53 |
| DES     | 3.06  | 3.11E-52 | 3.68  | 1.29E-44 |
| DOK2    | 1.89  | 4.12E-52 | 1.90  | 4.20E-35 |
| EPM2A   | 1.22  | 6.78E-52 | 0.97  | 2.68E-37 |
| SLC4A1  | 3.64  | 9.08E-52 | 2.83  | 4.10E-20 |
| PCDH12  | 1.68  | 1.70E-51 | 1.38  | 9.84E-22 |
| COX4I2  | 2.33  | 2.36E-51 | 2.62  | 4.17E-59 |
| GAB1    | 1.32  | 4.12E-51 | 1.28  | 4.87E-44 |
| CDC20   | -3.94 | 5.87E-51 | -3.98 | 4.21E-54 |
| ALOX5   | 1.94  | 1.16E-50 | 1.93  | 8.61E-32 |
| CASQ2   | 2.94  | 1.40E-50 | 3.36  | 6.70E-30 |
| EXO1    | -3.97 | 1.40E-50 | -3.84 | 1.16E-56 |
| CENPF   | -3.53 | 2.10E-50 | -3.45 | 4.46E-50 |
| NCF2    | 1.78  | 2.17E-50 | 1.49  | 1.04E-24 |
| MMRN1   | 2.42  | 2.88E-50 | 2.34  | 8.02E-30 |
| PLK1    | -3.46 | 4.35E-50 | -3.51 | 2.90E-54 |
| LRRC2   | 2.54  | 6.18E-50 | 2.86  | 2.69E-39 |
| LILRA5  | 2.22  | 7.69E-50 | 2.05  | 1.42E-36 |
| ADRB1   | 3.07  | 9.22E-50 | 4.00  | 6.77E-42 |
| TROAP   | -4.31 | 1.15E-49 | -3.61 | 1.17E-41 |
| MRC1    | 2.46  | 1.48E-49 | 2.41  | 1.90E-27 |
| TLR4    | 1.75  | 1.91E-49 | 1.34  | 4.00E-22 |
| N4BP1   | 0.90  | 1.98E-49 | 0.76  | 1.30E-25 |
| STX1A   | -3.21 | 2.00E-49 | -2.99 | 4.23E-53 |
| ENG     | 1.55  | 1.11E-48 | 1.38  | 7.59E-30 |
| MYL9    | 1.64  | 1.44E-48 | 1.56  | 1.90E-28 |
| PTCRA   | 2.40  | 1.44E-48 | 2.59  | 6.88E-34 |
| TPX2    | -3.82 | 2.74E-48 | -3.77 | 4.78E-50 |
| IL33    | 2.30  | 3.20E-48 | 2.36  | 2.27E-27 |
| CCNB1   | -3.08 | 3.34E-48 | -2.94 | 3.41E-52 |
| KIF11   | -2.92 | 3.70E-48 | -2.95 | 2.45E-46 |
| SLC14A1 | 2.83  | 4.02E-48 | 3.37  | 1.30E-33 |
| METTL7A | 1.80  | 4.26E-48 | 1.99  | 2.59E-51 |
| JDP2    | 1.34  | 4.76E-48 | 1.26  | 1.64E-23 |
| LY6G6F  | 4.22  | 5.13E-48 | 4.04  | 3.04E-29 |
| BIRC5   | -4.09 | 9.66E-48 | -4.06 | 1.12E-49 |
| CTHRC1  | -3.72 | 1.02E-47 | -4.02 | 1.16E-50 |
| GPX3    | 2.23  | 1.34E-47 | 2.35  | 1.01E-49 |
| FERMT1  | -3.35 | 2.06E-47 | -3.29 | 3.00E-77 |
| HELLS   | -3.03 | 2.50E-47 | -2.93 | 2.72E-52 |
| GNAQ    | 1.10  | 4.32E-47 | 0.99  | 9.55E-36 |
| UBE2C   | -4.38 | 4.33E-47 | -3.99 | 5.03E-58 |

|          |       |          |       |          |
|----------|-------|----------|-------|----------|
| GDF10    | 3.08  | 4.96E-47 | 4.00  | 1.33E-58 |
| MDK      | -3.28 | 5.26E-47 | -2.71 | 3.21E-69 |
| GIMAP4   | 1.52  | 5.41E-47 | 1.38  | 2.10E-22 |
| KAT2A    | -1.81 | 1.84E-46 | -1.30 | 2.37E-39 |
| CXCR1    | 2.98  | 2.68E-46 | 2.33  | 2.56E-20 |
| NME1     | -2.29 | 3.03E-46 | -2.27 | 3.90E-77 |
| COL10A1  | -4.67 | 3.45E-46 | -5.26 | 2.19E-59 |
| TNXB     | 2.58  | 5.69E-46 | 3.21  | 3.50E-42 |
| EPCAM    | -1.83 | 5.77E-46 | -1.49 | 4.27E-59 |
| MAMDC2   | 2.68  | 5.93E-46 | 3.10  | 1.35E-45 |
| TRAP1    | -1.29 | 6.12E-46 | -1.11 | 1.22E-46 |
| EME1     | -3.03 | 8.06E-46 | -2.52 | 2.73E-35 |
| NRG3     | 2.93  | 8.58E-46 | 3.55  | 1.21E-47 |
| FGF11    | -4.03 | 1.36E-45 | -3.37 | 1.48E-58 |
| HMGB3    | -3.70 | 1.36E-45 | -3.00 | 2.03E-54 |
| ESAM     | 1.81  | 1.50E-45 | 2.02  | 1.34E-54 |
| ADH1B    | 3.30  | 1.67E-45 | 4.21  | 7.64E-35 |
| CCT3     | -1.43 | 1.93E-45 | -1.45 | 9.56E-51 |
| TNFRSF21 | -2.14 | 3.39E-45 | -2.01 | 4.58E-53 |
| HMMR     | -3.39 | 3.75E-45 | -3.50 | 5.52E-58 |
| AHNAK    | 1.87  | 5.91E-45 | 1.88  | 4.72E-49 |
| MMP19    | 1.59  | 7.01E-45 | 1.33  | 1.27E-24 |
| RILPL2   | 1.18  | 7.36E-45 | 1.22  | 5.78E-54 |
| FOXM1    | -3.62 | 9.90E-45 | -3.34 | 4.41E-40 |
| CCNB2    | -3.44 | 1.03E-44 | -3.36 | 6.53E-51 |
| RHBDL2   | -3.02 | 1.03E-44 | -2.82 | 2.73E-36 |
| CFD      | 2.36  | 1.05E-44 | 2.61  | 5.67E-36 |
| ARHGEF6  | 1.46  | 1.08E-44 | 1.38  | 2.45E-30 |
| PRKCH    | 1.02  | 1.15E-44 | 0.91  | 5.34E-23 |
| FGF2     | 2.11  | 1.18E-44 | 1.95  | 3.15E-40 |
| S1PR4    | 1.75  | 1.21E-44 | 1.88  | 4.48E-34 |
| CD83     | 1.63  | 2.16E-44 | 1.64  | 4.78E-23 |
| COLEC10  | 3.70  | 3.38E-44 | 3.52  | 3.38E-40 |
| DNA2     | -2.59 | 3.43E-44 | -2.20 | 1.34E-38 |
| ANGPT1   | 2.24  | 4.22E-44 | 2.47  | 1.55E-38 |
| SLC11A1  | 1.94  | 4.25E-44 | 2.08  | 1.35E-49 |
| MEF2A    | 0.79  | 4.32E-44 | 0.69  | 1.90E-29 |
| CCNF     | -2.16 | 4.95E-44 | -1.93 | 1.18E-39 |
| E2F3     | -1.52 | 6.84E-44 | -1.57 | 3.68E-36 |
| CSF3     | 4.08  | 7.36E-44 | 4.20  | 1.72E-21 |
| PLEKHO2  | 1.21  | 7.78E-44 | 0.95  | 7.38E-24 |
| INPP5K   | 0.98  | 7.82E-44 | 1.07  | 8.27E-43 |
| FANCI    | -2.21 | 8.69E-44 | -2.13 | 1.97E-41 |



|         |       |          |       |          |
|---------|-------|----------|-------|----------|
| FUT2    | -3.25 | 1.04E-43 | -2.97 | 3.77E-41 |
| MASP1   | 2.66  | 1.09E-43 | 3.54  | 3.76E-49 |
| ESPL1   | -3.61 | 3.05E-43 | -3.28 | 5.00E-41 |
| ALOX5AP | 1.96  | 3.14E-43 | 1.98  | 1.62E-24 |
| GP9     | 3.38  | 3.14E-43 | 3.43  | 2.55E-22 |
| ZEB1    | 1.39  | 4.58E-43 | 1.14  | 6.64E-22 |
| SOX4    | -1.85 | 6.04E-43 | -1.78 | 8.92E-46 |
| TRAIP   | -2.21 | 6.27E-43 | -1.97 | 3.96E-28 |
| C2orf71 | 3.71  | 7.26E-43 | 4.73  | 9.65E-41 |
| OTC     | 4.04  | 7.68E-43 | 4.48  | 2.26E-41 |
| FPR1    | 2.04  | 1.11E-42 | 1.42  | 1.77E-22 |
| SEPT4   | 1.45  | 1.12E-42 | 1.46  | 3.68E-33 |
| MEFV    | 1.96  | 1.21E-42 | 1.78  | 7.71E-26 |
| CENPA   | -3.90 | 1.24E-42 | -3.67 | 2.93E-47 |
| GGCT    | -1.83 | 1.76E-42 | -1.47 | 2.05E-37 |
| PIP5K1B | 2.30  | 2.15E-42 | 2.56  | 2.95E-28 |
| ACTN2   | 2.88  | 2.45E-42 | 3.80  | 1.88E-88 |
| KCNA5   | 2.23  | 3.77E-42 | 2.16  | 2.00E-17 |
| CD68    | 1.55  | 3.99E-42 | 1.26  | 1.13E-19 |
| HBG1    | 5.16  | 4.07E-42 | 3.54  | 9.71E-29 |
| CYP3A7  | 3.45  | 4.37E-42 | 4.30  | 2.22E-45 |
| SLC2A1  | -3.43 | 4.74E-42 | -3.36 | 5.53E-46 |
| GAS6    | 1.68  | 4.75E-42 | 1.75  | 9.27E-33 |
| ABCG2   | 2.04  | 4.95E-42 | 2.07  | 4.17E-39 |
| TOM1L2  | 1.22  | 7.04E-42 | 1.46  | 1.99E-51 |
| EPB42   | 4.27  | 7.28E-42 | 3.33  | 4.22E-15 |
| DNASE2B | 3.06  | 8.03E-42 | 3.55  | 6.67E-30 |
| POLQ    | -3.53 | 8.13E-42 | -3.04 | 2.69E-33 |
| A2M     | 1.75  | 8.63E-42 | 1.78  | 6.55E-34 |
| CDT1    | -2.95 | 8.66E-42 | -2.81 | 2.07E-39 |
| ACE     | 1.67  | 9.50E-42 | 1.70  | 7.86E-41 |
| CCL23   | 2.66  | 1.00E-41 | 2.81  | 4.55E-29 |
| SOSTDC1 | 3.71  | 1.12E-41 | 5.56  | 2.93E-42 |
| BRIP1   | -3.03 | 1.25E-41 | -2.88 | 7.75E-38 |
| CLDN18  | 4.21  | 1.34E-41 | 6.46  | 1.88E-36 |
| MKI67   | -3.16 | 1.77E-41 | -3.21 | 1.78E-41 |
| PVT1    | -2.72 | 2.13E-41 | -2.16 | 2.82E-39 |
| SLC7A7  | 1.51  | 2.19E-41 | 1.42  | 9.20E-23 |
| FZD4    | 1.66  | 2.21E-41 | 1.48  | 9.00E-26 |
| GJA5    | 1.69  | 2.66E-41 | 1.21  | 4.04E-10 |
| TBX2    | 1.80  | 2.70E-41 | 1.82  | 3.56E-42 |
| KIF15   | -3.32 | 2.79E-41 | -3.15 | 4.81E-34 |
| GPBAR1  | 1.87  | 2.87E-41 | 2.02  | 7.54E-42 |

|          |       |          |       |          |
|----------|-------|----------|-------|----------|
| MARCKSL1 | -1.99 | 3.96E-41 | -2.09 | 2.03E-35 |
| TIMP3    | 1.85  | 4.01E-41 | 1.64  | 2.21E-21 |
| TK1      | -2.77 | 4.01E-41 | -2.65 | 9.04E-58 |
| MAP3K3   | 0.98  | 4.17E-41 | 0.94  | 1.11E-33 |
| PTPN5    | 3.61  | 4.37E-41 | 4.30  | 7.89E-42 |
| KLF13    | 1.27  | 6.15E-41 | 1.27  | 3.83E-35 |
| HSPB8    | 1.87  | 1.21E-40 | 2.16  | 2.32E-41 |
| C1orf106 | -2.28 | 1.26E-40 | -2.16 | 5.47E-39 |
| TRAF4    | -1.47 | 1.30E-40 | -1.11 | 7.78E-36 |
| LMOD1    | 1.78  | 1.47E-40 | 1.55  | 8.67E-22 |
| IL7R     | 2.17  | 1.55E-40 | 1.77  | 1.23E-15 |
| FIG4     | 0.92  | 1.56E-40 | 0.77  | 6.62E-25 |
| PDK4     | 2.39  | 1.60E-40 | 2.55  | 2.48E-54 |
| RASAL1   | -4.42 | 1.67E-40 | -4.24 | 1.97E-68 |
| KIF1C    | 1.18  | 1.86E-40 | 1.32  | 9.23E-55 |
| GNL3     | -1.22 | 2.53E-40 | -1.10 | 4.76E-31 |
| DCC      | 2.74  | 3.07E-40 | 2.77  | 1.39E-22 |
| GREM1    | -4.81 | 3.36E-40 | -5.22 | 7.51E-41 |
| PTPRH    | -5.70 | 4.16E-40 | -5.33 | 4.50E-47 |
| MMP11    | -5.25 | 4.24E-40 | -5.64 | 5.37E-66 |
| SPI1     | 1.61  | 4.61E-40 | 1.55  | 7.75E-25 |
| FANCD2   | -1.81 | 4.84E-40 | -1.62 | 5.53E-32 |
| MYH2     | 3.35  | 5.80E-40 | 3.47  | 2.35E-27 |
| P2RY14   | 1.61  | 6.00E-40 | 1.33  | 1.52E-15 |
| MME      | 2.68  | 6.40E-40 | 3.16  | 4.72E-42 |
| SSFA2    | 1.15  | 8.48E-40 | 1.24  | 2.37E-42 |
| CLCN2    | -1.78 | 1.11E-39 | -1.36 | 2.57E-22 |
| SVEP1    | 2.11  | 1.25E-39 | 1.91  | 2.62E-28 |
| XPR1     | -2.07 | 1.26E-39 | -1.68 | 2.38E-55 |
| TFAP4    | -1.43 | 1.49E-39 | -1.30 | 1.46E-27 |
| CCNA2    | -2.98 | 1.50E-39 | -2.93 | 6.03E-41 |
| P4HB     | -1.24 | 1.99E-39 | -1.17 | 6.94E-42 |
| GMFG     | 1.51  | 2.14E-39 | 1.47  | 1.46E-29 |
| FGF10    | 3.70  | 2.15E-39 | 3.90  | 2.22E-24 |
| TBX4     | 2.09  | 2.75E-39 | 2.25  | 6.77E-42 |
| GPR4     | 1.46  | 3.38E-39 | 1.22  | 2.79E-15 |
| ZNF366   | 1.93  | 3.82E-39 | 1.73  | 8.88E-26 |
| MCM4     | -2.30 | 3.88E-39 | -2.20 | 1.39E-43 |
| BLM      | -2.52 | 4.28E-39 | -2.29 | 7.18E-43 |
| GADD45B  | 1.63  | 4.28E-39 | 1.27  | 7.91E-15 |
| GJB2     | -4.71 | 4.37E-39 | -4.16 | 6.50E-56 |
| KIF23    | -3.02 | 5.70E-39 | -2.79 | 3.52E-41 |
| TNFSF12  | 1.13  | 5.77E-39 | 1.10  | 5.49E-30 |

|         |       |          |       |          |
|---------|-------|----------|-------|----------|
| BUB1    | -3.00 | 5.88E-39 | -2.90 | 1.05E-47 |
| GATA2   | 1.77  | 9.72E-39 | 1.94  | 9.78E-24 |
| GAPDH   | -1.82 | 9.75E-39 | -1.66 | 3.03E-39 |
| NEIL3   | -4.72 | 1.29E-38 | -3.96 | 1.93E-46 |
| SELPLG  | 1.46  | 1.45E-38 | 1.30  | 1.00E-22 |
| AURKA   | -2.77 | 1.80E-38 | -2.48 | 9.16E-44 |
| ABCA12  | -6.13 | 2.09E-38 | -6.44 | 2.92E-47 |
| UTRN    | 1.32  | 2.23E-38 | 1.36  | 1.38E-37 |
| WDR46   | -1.01 | 2.57E-38 | -0.94 | 3.13E-37 |
| XDH     | -4.57 | 3.70E-38 | -4.10 | 9.80E-49 |
| IRAK1   | -1.33 | 4.50E-38 | -1.31 | 1.26E-55 |
| LAD1    | -2.10 | 4.89E-38 | -1.87 | 1.09E-26 |
| JUND    | 1.33  | 6.48E-38 | 1.35  | 6.64E-19 |
| DKC1    | -1.26 | 7.50E-38 | -1.21 | 3.45E-47 |
| PBK     | -3.70 | 8.03E-38 | -3.60 | 5.38E-37 |
| FANCA   | -2.05 | 8.17E-38 | -1.93 | 1.66E-55 |
| SFXN4   | -1.50 | 8.17E-38 | -1.32 | 5.51E-41 |
| MYBL2   | -3.93 | 8.40E-38 | -4.25 | 4.47E-55 |
| CENPE   | -2.95 | 8.48E-38 | -2.78 | 6.91E-35 |
| PTH1R   | 2.03  | 8.67E-38 | 2.28  | 4.08E-43 |
| PILRA   | 1.57  | 9.03E-38 | 1.38  | 6.05E-21 |
| IL1RL1  | 3.35  | 1.14E-37 | 3.47  | 2.34E-23 |
| RAPGEF4 | 1.87  | 1.41E-37 | 2.11  | 3.28E-53 |
| FAM111B | -2.82 | 1.50E-37 | -2.81 | 5.86E-40 |
| PKP3    | -1.69 | 1.80E-37 | -1.41 | 4.16E-40 |
| KPNA2   | -2.07 | 1.91E-37 | -2.02 | 2.87E-47 |
| ICAM2   | 1.36  | 2.13E-37 | 1.32  | 3.51E-33 |
| SYT7    | -3.62 | 2.97E-37 | -2.68 | 5.34E-28 |
| PAK1    | -1.28 | 3.19E-37 | -1.36 | 1.86E-69 |
| SHANK3  | 1.35  | 3.91E-37 | 1.29  | 1.03E-25 |
| ENO1    | -1.35 | 4.51E-37 | -1.36 | 8.26E-42 |
| CCNE1   | -3.35 | 5.67E-37 | -3.19 | 1.10E-48 |
| HEATR1  | -1.11 | 5.76E-37 | -1.16 | 1.46E-48 |
| ESCO2   | -2.85 | 7.54E-37 | -2.79 | 1.17E-40 |
| DAPK2   | 1.76  | 7.85E-37 | 2.55  | 2.14E-63 |
| OGN     | 2.66  | 1.06E-36 | 2.90  | 1.35E-29 |
| HMGA1   | -2.30 | 1.14E-36 | -2.22 | 1.10E-44 |
| ST14    | -1.59 | 1.19E-36 | -1.51 | 9.95E-54 |
| MSI2    | -1.64 | 2.13E-36 | -1.69 | 4.17E-39 |
| TMEM79  | -1.47 | 2.53E-36 | -1.26 | 3.14E-25 |
| TFR2    | -3.74 | 3.02E-36 | -2.98 | 4.10E-58 |
| FOLR3   | 3.74  | 3.30E-36 | 4.35  | 5.19E-65 |
| GPM6B   | 1.96  | 3.30E-36 | 2.25  | 4.14E-35 |

|          |       |          |       |          |
|----------|-------|----------|-------|----------|
| SERPING1 | 1.30  | 4.18E-36 | 1.21  | 1.23E-22 |
| PPM1D    | 0.86  | 5.76E-36 | 0.66  | 4.65E-14 |
| CAMP     | 3.08  | 6.12E-36 | 3.55  | 1.65E-43 |
| ZFYVE9   | 1.30  | 6.71E-36 | 1.02  | 4.76E-26 |
| SOX18    | 1.58  | 7.19E-36 | 1.41  | 1.68E-17 |
| HDGF     | -1.15 | 7.27E-36 | -1.13 | 1.51E-33 |
| DCAF13   | -1.47 | 8.47E-36 | -1.33 | 2.39E-39 |
| SPP1     | -4.64 | 8.99E-36 | -4.74 | 1.97E-49 |
| FOSB     | 3.21  | 9.15E-36 | 3.63  | 1.54E-22 |
| FKBP11   | -2.00 | 9.75E-36 | -1.78 | 2.06E-37 |
| PGLYRP1  | 3.06  | 1.01E-35 | 2.23  | 1.24E-08 |
| SHCBP1   | -2.44 | 1.17E-35 | -2.53 | 7.13E-41 |
| SALL4    | -3.61 | 1.37E-35 | -3.19 | 4.97E-41 |
| PLEKHA8  | -1.52 | 1.38E-35 | -1.53 | 5.34E-40 |
| F12      | -3.35 | 1.45E-35 | -3.08 | 6.61E-42 |
| COL11A1  | -7.05 | 1.57E-35 | -7.53 | 4.31E-30 |
| HAS1     | 3.38  | 1.63E-35 | 1.74  | 4.45E-04 |
| RGS17    | -4.28 | 1.69E-35 | -3.80 | 1.29E-40 |
| WDR12    | -1.37 | 1.79E-35 | -1.37 | 7.17E-48 |
| VAMP2    | 1.01  | 1.99E-35 | 1.07  | 1.54E-41 |
| FBXO32   | -2.69 | 2.01E-35 | -2.42 | 1.04E-39 |
| TFAP2A   | -3.90 | 2.02E-35 | -3.98 | 6.46E-37 |
| MCOLN1   | 0.95  | 2.25E-35 | 0.83  | 2.14E-26 |
| HSPA5    | -1.03 | 2.50E-35 | -1.09 | 2.80E-36 |
| ANXA3    | 1.85  | 3.04E-35 | 2.00  | 4.58E-27 |
| MAD2L1   | -2.76 | 3.10E-35 | -2.60 | 5.64E-42 |
| CD300LF  | 1.85  | 3.28E-35 | 2.01  | 6.36E-31 |
| PTTG1    | -2.58 | 3.46E-35 | -2.28 | 3.56E-51 |
| GRHL3    | -4.36 | 3.47E-35 | -4.06 | 8.22E-39 |
| PTPN1    | 0.91  | 4.60E-35 | 0.80  | 1.51E-26 |
| TMEM150B | 2.04  | 4.63E-35 | 2.13  | 1.25E-26 |
| ABCC3    | -2.70 | 4.99E-35 | -2.10 | 1.80E-27 |
| FEN1     | -1.71 | 5.00E-35 | -1.65 | 1.55E-43 |
| CHEK1    | -2.26 | 5.02E-35 | -2.13 | 1.19E-35 |
| CBX4     | -1.24 | 5.85E-35 | -1.03 | 6.31E-29 |
| ARRB2    | 0.90  | 6.94E-35 | 0.85  | 4.80E-23 |
| WASF3    | 1.78  | 8.25E-35 | 2.01  | 2.08E-47 |
| GCNT3    | -5.11 | 8.31E-35 | -3.86 | 1.35E-28 |
| LIPN     | 3.36  | 8.31E-35 | 2.80  | 2.42E-16 |
| PC       | -1.90 | 1.02E-34 | -1.65 | 7.97E-28 |
| PMM2     | -1.17 | 1.04E-34 | -1.09 | 2.23E-36 |
| RETN     | 3.29  | 1.14E-34 | 4.38  | 2.82E-32 |
| KISS1R   | -6.58 | 1.17E-34 | -5.37 | 3.12E-35 |

|        |       |          |       |          |
|--------|-------|----------|-------|----------|
| WNT3   | -2.35 | 1.21E-34 | -1.90 | 7.26E-25 |
| STYK1  | -2.76 | 1.24E-34 | -2.37 | 9.02E-31 |
| RAD51  | -2.55 | 1.42E-34 | -2.36 | 2.38E-36 |
| HLA-E  | 1.15  | 1.56E-34 | 1.10  | 1.33E-30 |
| LDHA   | -1.46 | 1.65E-34 | -1.46 | 1.55E-42 |
| KAT2B  | 1.12  | 1.75E-34 | 1.17  | 3.74E-27 |
| CCRL2  | 1.64  | 2.32E-34 | 1.60  | 1.74E-23 |
| PTGER4 | 1.58  | 2.43E-34 | 1.56  | 7.02E-37 |
| NEXN   | 1.51  | 2.51E-34 | 1.18  | 4.53E-16 |
| BMP8A  | -2.90 | 2.75E-34 | -2.49 | 7.85E-33 |
| GNAI2  | 0.78  | 3.00E-34 | 0.58  | 3.69E-19 |
| ALG3   | -1.24 | 3.28E-34 | -1.15 | 1.07E-35 |
| PITX2  | -8.41 | 3.28E-34 | -6.79 | 1.55E-91 |
| SPATS2 | -1.32 | 3.69E-34 | -1.22 | 1.82E-42 |
| EDN1   | 1.94  | 3.77E-34 | 1.68  | 1.15E-17 |
| WDHD1  | -2.10 | 3.77E-34 | -1.86 | 2.81E-30 |
| EPRS   | -1.01 | 4.08E-34 | -1.09 | 3.48E-47 |
| RBM28  | -1.26 | 4.92E-34 | -1.20 | 4.83E-42 |
| TYMS   | -2.27 | 5.10E-34 | -2.23 | 6.93E-41 |
| SGPL1  | -1.13 | 5.61E-34 | -1.13 | 1.84E-62 |
| WDR75  | -0.93 | 5.98E-34 | -0.85 | 9.48E-41 |
| MCM2   | -2.11 | 7.10E-34 | -2.00 | 2.62E-36 |
| P2RY6  | -3.15 | 7.22E-34 | -2.73 | 1.06E-42 |
| POLR2H | -1.33 | 7.23E-34 | -1.03 | 1.20E-37 |
| HSPD1  | -1.40 | 7.40E-34 | -1.30 | 2.02E-49 |
| SELE   | 2.90  | 7.40E-34 | 1.83  | 5.62E-08 |
| CDK1   | -2.63 | 7.72E-34 | -2.31 | 7.99E-32 |
| IL6    | 2.64  | 7.78E-34 | 1.71  | 3.51E-09 |
| E2F2   | -2.44 | 8.03E-34 | -2.32 | 3.40E-31 |
| CAV3   | 3.34  | 9.26E-34 | 4.14  | 4.07E-40 |
| PROS1  | 1.48  | 9.72E-34 | 1.54  | 2.44E-28 |
| BCL9   | -1.48 | 1.05E-33 | -1.45 | 4.79E-38 |
| PARP1  | -1.05 | 1.09E-33 | -1.18 | 2.80E-46 |
| PDGFB  | 1.41  | 1.19E-33 | 1.13  | 1.39E-12 |
| CXCL2  | 2.35  | 1.21E-33 | 2.49  | 1.18E-18 |
| FCGR3B | 2.45  | 1.21E-33 | 1.93  | 2.31E-19 |
| PADI4  | 2.70  | 1.21E-33 | 2.51  | 6.69E-24 |
| HBG2   | 4.27  | 1.23E-33 | 3.71  | 1.20E-22 |
| FGFR4  | 2.37  | 1.26E-33 | 3.22  | 1.19E-36 |
| IL1RL2 | -2.89 | 1.26E-33 | -2.59 | 2.14E-22 |
| ILF2   | -1.19 | 1.30E-33 | -1.18 | 5.25E-38 |
| LILRA1 | 1.85  | 1.36E-33 | 1.44  | 1.73E-17 |
| PDE1B  | 1.79  | 1.66E-33 | 1.79  | 2.30E-26 |

|         |       |          |       |          |
|---------|-------|----------|-------|----------|
| MNX1    | -4.50 | 1.75E-33 | -3.88 | 7.55E-44 |
| UTP14A  | -0.92 | 1.98E-33 | -0.96 | 3.42E-32 |
| MYH10   | 1.38  | 2.24E-33 | 1.27  | 7.93E-21 |
| WFDC1   | 1.93  | 2.41E-33 | 1.99  | 1.21E-19 |
| RAD54B  | -1.99 | 2.56E-33 | -1.75 | 2.59E-23 |
| CDKN3   | -3.30 | 3.55E-33 | -3.17 | 6.20E-45 |
| SLCO2B1 | 1.57  | 3.98E-33 | 1.35  | 4.30E-15 |
| ONECUT1 | -6.60 | 4.28E-33 | -6.36 | 4.33E-47 |
| PLA2G4F | 2.39  | 4.41E-33 | 3.59  | 6.60E-39 |
| CYP24A1 | -6.86 | 4.89E-33 | -5.74 | 6.41E-36 |
| KIF22   | -1.23 | 5.30E-33 | -0.96 | 7.54E-24 |
| SLC7A5  | -2.75 | 5.66E-33 | -2.40 | 7.62E-41 |
| RRAS    | 1.25  | 6.20E-33 | 1.40  | 2.79E-44 |
| SLC5A6  | -1.23 | 6.46E-33 | -1.25 | 1.58E-47 |
| ATAD2   | -1.93 | 6.54E-33 | -1.70 | 6.30E-24 |
| KLF2    | 1.65  | 7.85E-33 | 1.66  | 1.09E-21 |
| LILRB3  | 1.48  | 9.71E-33 | 1.25  | 6.53E-18 |
| GPA33   | 3.03  | 1.13E-32 | 3.92  | 2.80E-47 |
| CBX3    | -1.17 | 1.31E-32 | -1.11 | 1.81E-31 |
| DDX56   | -0.98 | 1.31E-32 | -0.87 | 3.93E-27 |
| CHRD1   | 2.32  | 1.45E-32 | 2.72  | 6.23E-28 |
| CDCA7   | -3.06 | 1.60E-32 | -2.65 | 1.42E-25 |
| SIRPA   | 1.31  | 1.74E-32 | 0.98  | 3.11E-14 |
| BTK     | 1.50  | 1.85E-32 | 1.48  | 2.49E-19 |
| TPBG    | -1.89 | 1.92E-32 | -1.92 | 2.68E-37 |
| TLR8    | 1.90  | 1.95E-32 | 1.72  | 1.31E-17 |
| GFPT1   | -1.27 | 1.97E-32 | -1.14 | 2.05E-35 |
| GPR182  | 1.77  | 2.27E-32 | 1.26  | 5.37E-14 |
| KCNN4   | -3.35 | 2.44E-32 | -3.42 | 2.29E-36 |
| PALB2   | -0.89 | 2.60E-32 | -0.96 | 1.30E-29 |
| NSF     | -0.92 | 3.74E-32 | -1.06 | 4.98E-44 |
| BDNF    | 2.59  | 3.96E-32 | 3.39  | 1.20E-37 |
| TRIM27  | -0.90 | 3.96E-32 | -0.77 | 4.90E-25 |
| RASSF2  | 1.32  | 5.25E-32 | 0.98  | 2.60E-16 |
| SORBS1  | 1.48  | 6.62E-32 | 1.58  | 1.43E-35 |
| PAX6    | 1.40  | 7.40E-32 | 1.49  | 9.09E-25 |
| UBASH3B | 1.63  | 7.83E-32 | 1.47  | 8.26E-19 |
| HSH2D   | -1.54 | 7.89E-32 | -1.22 | 8.40E-24 |
| UBE2O   | -0.99 | 9.02E-32 | -0.95 | 1.24E-30 |
| CYP27B1 | -2.56 | 9.25E-32 | -2.40 | 1.05E-32 |
| NUP85   | -0.98 | 9.28E-32 | -0.87 | 3.89E-26 |
| HK3     | 1.86  | 9.89E-32 | 1.98  | 2.10E-26 |
| DARS2   | -1.35 | 1.21E-31 | -1.32 | 1.48E-37 |

|          |       |          |       |          |
|----------|-------|----------|-------|----------|
| BYSL     | -1.39 | 1.26E-31 | -1.28 | 1.71E-31 |
| DUOX1    | 2.49  | 1.36E-31 | 3.60  | 9.76E-36 |
| CDC25A   | -2.57 | 1.72E-31 | -2.42 | 7.12E-29 |
| AQP4     | 2.85  | 2.01E-31 | 4.10  | 7.25E-28 |
| THBS2    | -2.92 | 2.40E-31 | -3.28 | 1.26E-42 |
| NOL10    | -0.87 | 2.55E-31 | -0.85 | 1.49E-31 |
| OVCH2    | 3.45  | 2.59E-31 | 4.32  | 1.67E-40 |
| GATA1    | 2.08  | 2.92E-31 | 2.26  | 2.51E-28 |
| PGR      | 1.82  | 3.08E-31 | 1.79  | 1.04E-26 |
| ROR1     | 1.85  | 3.08E-31 | 1.53  | 2.21E-15 |
| PTGES    | -3.12 | 3.22E-31 | -2.70 | 1.85E-32 |
| FANCF    | -1.02 | 3.34E-31 | -1.08 | 3.74E-27 |
| TSPYL1   | 0.77  | 3.85E-31 | 0.59  | 7.62E-19 |
| NEK7     | 0.89  | 3.96E-31 | 0.81  | 2.44E-21 |
| CARD14   | -3.71 | 4.31E-31 | -2.73 | 3.20E-27 |
| CCDC137  | -1.13 | 4.98E-31 | -0.98 | 1.45E-24 |
| CNP      | -0.87 | 5.05E-31 | -0.90 | 3.03E-41 |
| SRPK3    | -3.96 | 6.98E-31 | -2.82 | 3.36E-20 |
| RAC3     | -2.48 | 7.85E-31 | -2.01 | 3.80E-34 |
| GARS     | -1.14 | 8.34E-31 | -1.13 | 4.24E-36 |
| POC1A    | -1.71 | 9.44E-31 | -1.58 | 9.91E-27 |
| MNDA     | 1.58  | 1.02E-30 | 1.44  | 3.45E-17 |
| GHR      | 1.94  | 1.04E-30 | 2.21  | 1.13E-46 |
| BRIX1    | -1.44 | 1.29E-30 | -1.14 | 4.71E-29 |
| DNASE1   | -1.90 | 1.42E-30 | -1.46 | 1.78E-23 |
| CEACAM1  | -2.20 | 1.57E-30 | -1.80 | 8.12E-24 |
| NSUN2    | -1.18 | 1.82E-30 | -1.04 | 1.55E-28 |
| MYEOV    | -6.69 | 2.01E-30 | -4.53 | 5.11E-27 |
| HSPE1    | -1.37 | 2.42E-30 | -1.19 | 2.38E-36 |
| TACC3    | -1.77 | 2.46E-30 | -1.65 | 1.13E-33 |
| SKIV2L   | -0.90 | 2.62E-30 | -0.75 | 3.74E-29 |
| GATA6    | 1.74  | 2.74E-30 | 2.13  | 6.50E-37 |
| P2RY1    | 1.66  | 2.87E-30 | 1.51  | 4.40E-24 |
| CD33     | 1.55  | 3.02E-30 | 1.48  | 9.59E-19 |
| IL18R1   | 1.63  | 3.21E-30 | 1.24  | 1.13E-07 |
| SGCA     | 1.99  | 4.07E-30 | 2.22  | 5.35E-33 |
| TRIP13   | -2.73 | 4.40E-30 | -2.72 | 5.82E-22 |
| SLC44A2  | 0.81  | 4.73E-30 | 0.94  | 5.45E-32 |
| C1orf198 | 1.04  | 6.00E-30 | 1.14  | 1.04E-31 |
| HYOU1    | -1.27 | 6.04E-30 | -1.29 | 4.08E-43 |
| ANO6     | 0.89  | 6.19E-30 | 0.66  | 9.06E-13 |
| MC1R     | -2.02 | 6.20E-30 | -1.81 | 1.66E-23 |
| FAP      | -2.42 | 7.47E-30 | -2.39 | 6.59E-25 |

|          |       |          |       |          |
|----------|-------|----------|-------|----------|
| TRIM59   | -1.65 | 8.15E-30 | -1.63 | 5.20E-34 |
| TNFSF13  | 1.14  | 1.02E-29 | 1.16  | 4.90E-22 |
| DTL      | -2.06 | 1.10E-29 | -2.31 | 5.00E-22 |
| NOP2     | -1.29 | 1.10E-29 | -1.01 | 6.46E-22 |
| LTC4S    | 1.74  | 1.13E-29 | 1.82  | 6.28E-27 |
| GFRA2    | 1.85  | 1.29E-29 | 1.75  | 6.83E-20 |
| SPDEF    | -3.34 | 1.56E-29 | -2.98 | 1.16E-24 |
| DLG5     | -1.38 | 1.57E-29 | -1.38 | 8.47E-33 |
| PTGIR    | 1.28  | 1.57E-29 | 1.05  | 1.49E-14 |
| PMP22    | 1.18  | 1.71E-29 | 0.97  | 6.52E-18 |
| TNS3     | 1.05  | 1.78E-29 | 0.89  | 1.25E-16 |
| NVL      | -0.89 | 1.88E-29 | -0.78 | 3.23E-21 |
| TYROBP   | 1.52  | 1.97E-29 | 1.52  | 1.44E-24 |
| ATP1A2   | 2.29  | 2.07E-29 | 3.00  | 3.37E-34 |
| HDAC1    | -0.87 | 2.11E-29 | -0.82 | 1.19E-27 |
| CCT5     | -1.40 | 2.16E-29 | -1.31 | 5.25E-41 |
| MCM8     | -1.70 | 2.25E-29 | -1.42 | 2.06E-22 |
| CLDN12   | -1.30 | 2.90E-29 | -1.22 | 8.03E-32 |
| F2RL3    | 1.73  | 3.11E-29 | 1.39  | 1.09E-13 |
| EEF1A2   | -6.70 | 4.38E-29 | -5.21 | 1.55E-29 |
| HTR3A    | -6.14 | 4.38E-29 | -5.69 | 9.89E-37 |
| MMACHC   | -1.17 | 4.73E-29 | -1.25 | 2.15E-29 |
| PIK3R1   | 1.00  | 4.89E-29 | 0.84  | 2.41E-19 |
| AQP11    | -1.90 | 5.35E-29 | -1.77 | 3.56E-27 |
| NOL11    | -0.87 | 5.40E-29 | -0.90 | 4.29E-34 |
| COG2     | -0.80 | 5.41E-29 | -0.81 | 3.82E-23 |
| STT3A    | -0.94 | 5.49E-29 | -0.96 | 4.09E-33 |
| PREX1    | 1.25  | 5.54E-29 | 1.06  | 1.76E-15 |
| SLCO2A1  | 1.70  | 5.83E-29 | 1.79  | 6.09E-19 |
| MITF     | 1.23  | 6.00E-29 | 1.05  | 1.15E-17 |
| ZFP36    | 1.69  | 6.20E-29 | 1.55  | 4.43E-19 |
| SOCS2    | 1.87  | 6.93E-29 | 2.04  | 3.40E-26 |
| PTPRO    | 1.63  | 8.42E-29 | 1.62  | 5.86E-19 |
| TPI1     | -1.24 | 8.79E-29 | -1.14 | 9.44E-34 |
| CYGB     | 1.15  | 9.47E-29 | 1.04  | 7.20E-19 |
| ADAM8    | -2.07 | 1.05E-28 | -2.21 | 3.52E-37 |
| C19orf48 | -1.56 | 1.11E-28 | -1.19 | 5.09E-22 |
| HPSE2    | 2.70  | 1.12E-28 | 2.85  | 4.36E-25 |
| FHL2     | -2.45 | 1.18E-28 | -2.76 | 2.00E-45 |
| SH2B3    | 0.95  | 1.36E-28 | 0.76  | 1.04E-14 |
| C1QA     | 1.56  | 1.39E-28 | 1.69  | 1.13E-21 |
| TRAF7    | -0.90 | 1.40E-28 | -0.90 | 1.19E-30 |
| KLHL12   | -0.73 | 1.49E-28 | -0.70 | 3.22E-21 |



|         |       |          |       |          |
|---------|-------|----------|-------|----------|
| LRRFIP1 | 0.81  | 1.55E-28 | 0.74  | 1.02E-22 |
| TERT    | -5.02 | 1.73E-28 | -4.88 | 4.29E-21 |
| HM13    | -0.93 | 1.81E-28 | -0.97 | 5.83E-39 |
| FLVCR1  | -1.49 | 1.82E-28 | -1.24 | 2.69E-23 |
| CLEC12A | 2.03  | 2.08E-28 | 2.31  | 8.60E-22 |
| FLT4    | 1.33  | 2.10E-28 | 1.26  | 2.05E-19 |
| TPPP3   | 2.21  | 2.16E-28 | 3.08  | 6.10E-40 |
| AQP9    | 1.81  | 2.17E-28 | 1.45  | 4.22E-14 |
| SEMA4B  | -1.75 | 2.31E-28 | -1.54 | 1.36E-31 |
| MRAS    | 1.06  | 2.36E-28 | 0.85  | 1.22E-18 |
| FUT3    | -2.50 | 2.52E-28 | -1.98 | 5.22E-26 |
| CRYAB   | 1.80  | 2.60E-28 | 2.20  | 1.08E-51 |
| PPM1G   | -0.80 | 2.63E-28 | -0.87 | 2.24E-29 |
| HPS3    | -0.96 | 2.85E-28 | -0.82 | 4.42E-20 |
| NME4    | -1.52 | 2.87E-28 | -1.35 | 4.36E-42 |
| CRIM1   | 1.25  | 3.00E-28 | 1.22  | 1.02E-23 |
| C6orf25 | 2.43  | 3.04E-28 | 2.48  | 2.25E-15 |
| LMO7    | 1.27  | 3.04E-28 | 1.45  | 3.01E-25 |
| CTGF    | 1.55  | 3.26E-28 | 1.06  | 6.94E-10 |
| STRA6   | -4.60 | 3.26E-28 | -4.72 | 9.15E-39 |
| PDE8B   | 1.88  | 3.29E-28 | 2.31  | 4.28E-39 |
| COL1A1  | -2.86 | 3.48E-28 | -3.39 | 9.22E-33 |
| ALDOA   | -1.30 | 3.79E-28 | -1.23 | 3.37E-31 |
| CANT1   | -1.01 | 3.91E-28 | -1.10 | 9.41E-40 |
| SAMHD1  | 1.20  | 3.98E-28 | 0.97  | 5.23E-14 |
| DAB2    | 1.13  | 4.22E-28 | 0.94  | 2.38E-13 |
| FARSB   | -0.95 | 4.38E-28 | -0.92 | 1.81E-33 |
| ABHD5   | 0.79  | 4.50E-28 | 0.73  | 7.40E-24 |
| CP      | -3.70 | 5.00E-28 | -2.91 | 2.38E-15 |
| PTRH2   | -1.16 | 5.05E-28 | -1.01 | 4.76E-26 |
| C1QB    | 1.60  | 5.99E-28 | 1.71  | 1.53E-19 |
| WNT2B   | 1.46  | 6.01E-28 | 1.43  | 4.76E-17 |
| ARID5A  | 1.03  | 6.30E-28 | 0.82  | 8.10E-10 |
| HYLS1   | -1.42 | 6.36E-28 | -1.25 | 5.70E-24 |
| UBE2I   | -0.70 | 6.43E-28 | -0.70 | 1.69E-38 |
| ARAP2   | 1.18  | 7.81E-28 | 1.12  | 1.07E-30 |
| YDJC    | -1.45 | 7.99E-28 | -1.07 | 5.53E-27 |
| SIGLEC5 | 1.57  | 8.04E-28 | 1.28  | 4.28E-16 |
| CCHCR1  | -1.30 | 8.12E-28 | -0.98 | 7.71E-26 |
| CALM1   | 0.67  | 8.99E-28 | 0.60  | 3.71E-18 |
| SEC61A1 | -0.76 | 1.06E-27 | -0.83 | 1.13E-33 |
| MYO1C   | 0.81  | 1.07E-27 | 0.83  | 7.02E-20 |
| ADD1    | 0.59  | 1.15E-27 | 0.54  | 3.99E-23 |

|          |       |          |       |          |
|----------|-------|----------|-------|----------|
| FRMD4B   | 1.02  | 1.15E-27 | 1.02  | 1.45E-22 |
| WFDC3    | -4.23 | 1.20E-27 | -2.90 | 4.02E-26 |
| STIP1    | -0.96 | 1.30E-27 | -0.94 | 5.73E-35 |
| SEC14L1  | 0.97  | 1.33E-27 | 0.74  | 8.40E-09 |
| ARSH     | -4.77 | 1.40E-27 | -4.40 | 2.34E-31 |
| LPGAT1   | -1.13 | 1.49E-27 | -1.16 | 4.05E-29 |
| H2AFX    | -1.41 | 1.61E-27 | -1.22 | 8.72E-24 |
| CYP1A2   | 4.12  | 1.72E-27 | 5.66  | 1.86E-48 |
| CETP     | 1.66  | 1.79E-27 | 1.55  | 2.66E-11 |
| FBXL19   | -1.32 | 1.90E-27 | -1.17 | 7.26E-26 |
| NUP155   | -1.55 | 2.01E-27 | -1.48 | 2.36E-35 |
| HMBS     | -1.28 | 2.23E-27 | -1.10 | 8.90E-31 |
| CFL2     | 1.25  | 2.44E-27 | 1.29  | 1.12E-25 |
| FBLN5    | 1.67  | 2.47E-27 | 1.93  | 4.07E-36 |
| AP1S2    | 1.19  | 2.56E-27 | 0.95  | 4.70E-13 |
| LIPA     | 1.29  | 2.69E-27 | 0.74  | 1.01E-06 |
| SLC25A13 | -1.17 | 2.82E-27 | -1.19 | 2.41E-43 |
| H1FO     | -1.33 | 2.89E-27 | -1.05 | 1.30E-35 |
| EIF4E3   | 1.03  | 3.22E-27 | 0.93  | 1.88E-19 |
| SHROOM4  | 1.56  | 3.23E-27 | 1.84  | 3.74E-40 |
| PMS2     | -0.90 | 3.25E-27 | -0.75 | 1.55E-18 |
| IKBKE    | -1.21 | 3.35E-27 | -1.26 | 9.55E-36 |
| ZNF365   | 1.81  | 3.41E-27 | 1.98  | 1.48E-25 |
| GPI      | -1.24 | 3.77E-27 | -1.24 | 3.97E-44 |
| EFEMP1   | 1.51  | 4.12E-27 | 1.80  | 4.71E-26 |
| PSMD11   | -1.01 | 4.22E-27 | -1.04 | 3.18E-37 |
| DCN      | 1.47  | 4.54E-27 | 1.16  | 1.72E-12 |
| MOGS     | -0.76 | 4.54E-27 | -0.61 | 1.81E-19 |
| TNFRSF18 | -2.81 | 4.56E-27 | -2.50 | 1.42E-25 |
| NMU      | -6.00 | 4.67E-27 | -5.62 | 7.40E-26 |
| FANCG    | -1.30 | 4.69E-27 | -1.19 | 2.16E-29 |
| SOX12    | -1.47 | 4.79E-27 | -1.11 | 3.49E-15 |
| FUT8     | -1.53 | 4.89E-27 | -1.44 | 4.79E-38 |
| NDRG2    | 1.50  | 4.92E-27 | 1.73  | 6.50E-33 |
| GTF2IRD1 | -1.09 | 5.37E-27 | -1.00 | 7.12E-23 |
| RPL36A   | -1.67 | 5.37E-27 | -1.33 | 2.09E-13 |
| UTP6     | -0.77 | 5.97E-27 | -0.73 | 7.35E-28 |
| BCS1L    | -0.90 | 6.08E-27 | -0.70 | 3.69E-21 |
| ETS1     | 1.14  | 6.14E-27 | 0.84  | 1.60E-12 |
| CCL24    | 2.86  | 6.56E-27 | 2.33  | 4.01E-12 |
| KMO      | 1.49  | 7.63E-27 | 1.37  | 5.73E-15 |
| SPTAN1   | 0.77  | 9.18E-27 | 0.61  | 3.56E-12 |
| HOXA5    | 1.55  | 9.20E-27 | 1.52  | 1.91E-22 |

|          |       |          |       |          |
|----------|-------|----------|-------|----------|
| KIAA1524 | -2.29 | 1.11E-26 | -2.01 | 1.78E-24 |
| TCF3     | -1.10 | 1.12E-26 | -1.01 | 9.01E-29 |
| CHEK2    | -1.72 | 1.17E-26 | -1.26 | 1.23E-20 |
| FOXP3    | -2.12 | 1.26E-26 | -2.38 | 2.37E-42 |
| CPSF6    | -0.71 | 1.35E-26 | -0.66 | 1.61E-24 |
| ATAD3B   | -1.64 | 1.40E-26 | -1.16 | 9.86E-19 |
| MSH5     | -1.82 | 1.41E-26 | -1.09 | 1.67E-12 |
| LEPR     | 1.82  | 1.50E-26 | 1.97  | 2.96E-48 |
| NAA25    | -0.97 | 1.50E-26 | -0.79 | 3.41E-18 |
| COPA     | -0.77 | 1.52E-26 | -0.86 | 4.54E-26 |
| AIMP2    | -1.15 | 1.54E-26 | -1.07 | 6.43E-26 |
| FABP5    | 1.94  | 1.54E-26 | 2.02  | 5.98E-27 |
| TCF4     | 1.21  | 1.58E-26 | 0.87  | 2.06E-11 |
| ABCG1    | 1.33  | 1.64E-26 | 1.32  | 3.95E-29 |
| EPHB2    | -2.42 | 1.64E-26 | -2.38 | 1.46E-39 |
| DDOST    | -0.86 | 1.73E-26 | -0.87 | 7.82E-39 |
| LIFR     | 1.52  | 1.77E-26 | 1.88  | 7.72E-29 |
| KLF10    | 0.94  | 1.82E-26 | 0.88  | 1.04E-13 |
| STX2     | 0.90  | 2.03E-26 | 0.91  | 1.44E-17 |
| CORO1C   | 0.89  | 2.04E-26 | 0.75  | 1.81E-16 |
| PRMT3    | -1.00 | 2.07E-26 | -0.97 | 1.97E-28 |
| MMP1     | -5.24 | 2.52E-26 | -5.40 | 6.05E-33 |
| FUBP1    | -0.79 | 2.60E-26 | -0.85 | 1.19E-27 |
| FBXO41   | -1.83 | 2.73E-26 | -1.36 | 2.19E-15 |
| VIM      | 1.18  | 3.14E-26 | 0.95  | 1.94E-15 |
| XPO1     | -0.78 | 3.48E-26 | -0.75 | 1.54E-26 |
| CKS1B    | -1.85 | 3.57E-26 | -1.65 | 1.66E-27 |
| DDX41    | -0.73 | 4.05E-26 | -0.71 | 5.00E-24 |
| CALR     | -0.80 | 4.53E-26 | -0.81 | 3.85E-29 |
| PRG4     | 2.60  | 4.73E-26 | 3.29  | 2.38E-21 |
| SLC37A4  | -0.93 | 4.79E-26 | -0.76 | 1.06E-19 |
| TIMP1    | -1.61 | 4.83E-26 | -1.76 | 8.15E-40 |
| FCN1     | 1.85  | 4.88E-26 | 1.59  | 6.26E-17 |
| URB1     | -1.19 | 5.60E-26 | -1.08 | 1.44E-22 |
| GUCY1A2  | 1.53  | 5.75E-26 | 1.35  | 1.49E-16 |
| SLC2A9   | 1.25  | 6.27E-26 | 0.88  | 3.72E-10 |
| NLE1     | -1.08 | 6.75E-26 | -1.01 | 8.58E-23 |
| COL3A1   | -2.45 | 6.90E-26 | -2.96 | 3.93E-31 |
| CKAP4    | -1.16 | 7.56E-26 | -1.15 | 1.43E-32 |
| IDH2     | -1.23 | 8.03E-26 | -1.14 | 1.34E-30 |
| TRIM46   | -2.31 | 8.45E-26 | -1.61 | 1.27E-16 |
| TTN      | 1.40  | 8.76E-26 | 1.61  | 5.75E-27 |
| GPR17    | 2.18  | 8.93E-26 | 2.91  | 2.82E-45 |

|          |       |          |       |          |
|----------|-------|----------|-------|----------|
| YWHAZ    | -0.98 | 9.25E-26 | -0.91 | 1.33E-25 |
| ATG16L1  | -0.74 | 9.32E-26 | -0.59 | 5.37E-19 |
| RRP1     | -0.95 | 9.56E-26 | -0.77 | 8.84E-21 |
| STOM     | 1.10  | 9.56E-26 | 1.19  | 9.58E-32 |
| PCOLCE2  | 2.28  | 1.04E-25 | 2.92  | 1.08E-33 |
| LIG3     | -0.98 | 1.05E-25 | -0.96 | 5.66E-31 |
| HVCN1    | 1.10  | 1.24E-25 | 0.94  | 4.38E-16 |
| TSTA3    | -1.46 | 1.26E-25 | -1.20 | 2.18E-19 |
| ABCB6    | -2.00 | 1.35E-25 | -1.53 | 4.83E-21 |
| ADCY8    | 4.35  | 1.36E-25 | 5.99  | 9.10E-42 |
| PIK3R5   | 1.30  | 1.58E-25 | 1.23  | 5.56E-18 |
| HMGN1    | -0.86 | 1.59E-25 | -0.75 | 3.66E-26 |
| B3GNT6   | -5.96 | 1.67E-25 | -4.86 | 3.52E-21 |
| MMP13    | -6.45 | 1.68E-25 | -6.40 | 9.02E-27 |
| KPNB1    | -0.85 | 1.75E-25 | -0.93 | 1.05E-36 |
| MYLK     | 1.23  | 1.78E-25 | 0.88  | 2.65E-10 |
| LILRA6   | 1.51  | 1.79E-25 | 1.42  | 3.84E-17 |
| MEN1     | -0.89 | 1.84E-25 | -0.73 | 6.76E-22 |
| GSS      | -0.89 | 1.89E-25 | -0.83 | 3.32E-24 |
| NEDD9    | 1.46  | 1.91E-25 | 1.62  | 1.68E-25 |
| LPAR2    | -1.13 | 1.98E-25 | -0.92 | 7.65E-24 |
| PDLIM1   | 0.88  | 2.04E-25 | 0.98  | 7.61E-22 |
| RUNX2    | -1.75 | 2.07E-25 | -1.74 | 2.53E-34 |
| EGR1     | 1.72  | 2.12E-25 | 1.40  | 3.42E-11 |
| POLR1C   | -1.05 | 2.20E-25 | -0.75 | 1.93E-15 |
| PRDX4    | -1.43 | 2.31E-25 | -1.60 | 2.48E-48 |
| NOC2L    | -0.93 | 2.36E-25 | -0.89 | 2.46E-26 |
| ATP6V1C2 | -3.08 | 2.42E-25 | -1.37 | 1.66E-19 |
| CRBN     | 0.82  | 2.68E-25 | 0.78  | 3.30E-17 |
| IQSEC1   | 0.79  | 2.69E-25 | 0.70  | 8.85E-20 |
| BOP1     | -2.08 | 2.75E-25 | -2.05 | 1.61E-20 |
| HSP90B1  | -1.09 | 3.23E-25 | -0.93 | 5.09E-36 |
| HSD17B6  | 2.28  | 3.29E-25 | 3.23  | 3.31E-39 |
| SERPINH1 | -1.19 | 3.37E-25 | -1.22 | 1.06E-28 |
| SNRPA    | -0.78 | 3.39E-25 | -0.64 | 1.81E-19 |
| PSMD12   | -0.86 | 3.83E-25 | -0.94 | 3.10E-33 |
| HCK      | 1.41  | 3.91E-25 | 1.25  | 6.82E-13 |
| RBM34    | -0.79 | 4.00E-25 | -0.69 | 1.58E-19 |
| HSF2BP   | -2.30 | 4.18E-25 | -2.03 | 1.19E-17 |
| HYAL1    | 1.98  | 4.34E-25 | 2.95  | 4.73E-33 |
| NAT10    | -0.80 | 4.47E-25 | -0.78 | 1.37E-33 |
| TXNDC5   | -0.94 | 4.58E-25 | -1.08 | 5.11E-36 |
| NR4A3    | 2.11  | 5.40E-25 | 2.07  | 8.81E-14 |

|          |       |          |       |          |
|----------|-------|----------|-------|----------|
| NCKAP1L  | 1.33  | 5.68E-25 | 1.17  | 2.73E-13 |
| SYVN1    | -0.87 | 5.90E-25 | -0.72 | 7.91E-21 |
| PROC     | -4.34 | 7.08E-25 | -2.20 | 5.20E-17 |
| CYBB     | 1.52  | 7.87E-25 | 1.17  | 3.32E-10 |
| EGLN3    | -3.15 | 7.87E-25 | -2.49 | 1.92E-26 |
| COL5A2   | -2.15 | 8.64E-25 | -2.41 | 1.01E-29 |
| LY86     | 1.47  | 9.15E-25 | 1.37  | 1.96E-18 |
| GORAB    | -0.96 | 9.21E-25 | -0.87 | 7.14E-16 |
| GMDS     | -1.46 | 9.70E-25 | -1.40 | 1.15E-23 |
| LST1     | 1.53  | 9.70E-25 | 1.59  | 2.48E-22 |
| PRAME    | -7.53 | 9.70E-25 | -5.85 | 5.63E-21 |
| AP1S1    | -1.24 | 1.01E-24 | -1.19 | 2.18E-33 |
| SLA      | 1.22  | 1.05E-24 | 1.03  | 6.53E-14 |
| SDCBP    | 0.78  | 1.07E-24 | 0.59  | 1.53E-15 |
| NQO1     | -3.09 | 1.10E-24 | -2.28 | 1.29E-16 |
| KDELR1   | -0.74 | 1.21E-24 | -0.67 | 2.56E-22 |
| TFG      | -0.91 | 1.24E-24 | -0.84 | 2.12E-29 |
| TLN1     | 0.76  | 1.24E-24 | 0.56  | 1.09E-10 |
| CAMK2A   | 1.66  | 1.44E-24 | 1.95  | 7.05E-30 |
| YARS     | -0.75 | 1.50E-24 | -0.65 | 6.14E-20 |
| COLEC12  | 1.67  | 1.67E-24 | 1.68  | 3.87E-22 |
| SEC24D   | -0.93 | 1.68E-24 | -1.08 | 2.22E-39 |
| MPP6     | -2.01 | 1.84E-24 | -1.87 | 2.61E-32 |
| MRTO4    | -1.05 | 1.87E-24 | -0.98 | 5.75E-29 |
| HNRNPL   | -0.54 | 1.88E-24 | -0.52 | 5.05E-22 |
| SCGB1A1  | 3.56  | 1.89E-24 | 5.58  | 4.82E-22 |
| CD2AP    | -1.03 | 1.95E-24 | -0.81 | 6.40E-20 |
| WISP1    | -2.15 | 1.98E-24 | -2.52 | 4.94E-37 |
| ALG6     | -0.88 | 2.00E-24 | -0.75 | 1.04E-19 |
| GTPBP2   | -0.78 | 2.24E-24 | -0.53 | 5.36E-12 |
| CBX2     | -2.72 | 2.28E-24 | -2.21 | 2.63E-18 |
| KCNE1    | 2.33  | 2.39E-24 | 2.67  | 1.84E-23 |
| ENTPD7   | -1.19 | 2.40E-24 | -1.41 | 1.90E-37 |
| PTGDS    | 1.73  | 2.48E-24 | 1.81  | 2.33E-22 |
| SMUG1    | -1.18 | 2.59E-24 | -0.89 | 2.51E-23 |
| SEMA6D   | 1.97  | 2.71E-24 | 2.57  | 3.50E-45 |
| LAPTM5   | 1.19  | 2.78E-24 | 0.97  | 6.09E-12 |
| SLC2A5   | -2.61 | 3.01E-24 | -3.09 | 1.06E-31 |
| MYH11    | 1.81  | 3.05E-24 | 1.91  | 1.93E-17 |
| KCNAB2   | 1.14  | 3.52E-24 | 1.19  | 4.60E-19 |
| RNASEH2A | -1.40 | 3.93E-24 | -1.32 | 3.76E-29 |
| PPARG    | 1.66  | 4.01E-24 | 1.96  | 1.68E-21 |
| MAGED1   | -1.06 | 4.14E-24 | -1.12 | 1.72E-33 |

|          |       |          |       |          |
|----------|-------|----------|-------|----------|
| 6-Mar    | -1.09 | 4.16E-24 | -0.82 | 1.15E-22 |
| TNFRSF25 | -2.20 | 4.22E-24 | -1.39 | 4.87E-12 |
| RPGR     | 1.02  | 4.34E-24 | 0.99  | 1.30E-22 |
| MIF      | -1.60 | 4.43E-24 | -1.42 | 3.10E-33 |
| IL31RA   | -4.66 | 4.50E-24 | -3.86 | 2.71E-24 |
| OSTM1    | 0.79  | 4.99E-24 | 0.59  | 1.95E-13 |
| PPP3CC   | 0.69  | 5.04E-24 | 0.71  | 2.43E-17 |
| BUB3     | -0.80 | 5.42E-24 | -0.87 | 7.69E-29 |
| DENR     | -0.77 | 5.80E-24 | -0.73 | 1.73E-20 |
| GMNN     | -1.49 | 5.80E-24 | -1.34 | 1.21E-24 |
| CYR61    | 1.50  | 5.82E-24 | 1.08  | 3.65E-09 |
| SRPX2    | -2.47 | 6.18E-24 | -2.35 | 3.20E-28 |
| KLHL17   | -1.58 | 6.57E-24 | -1.02 | 7.13E-14 |
| NUP62    | -0.69 | 6.62E-24 | -0.73 | 1.37E-26 |
| MS4A2    | 1.94  | 6.87E-24 | 2.27  | 1.48E-27 |
| PAPSS2   | 1.32  | 7.15E-24 | 1.46  | 3.41E-25 |
| COCH     | -3.99 | 7.40E-24 | -3.44 | 5.72E-30 |
| PSMD4    | -0.97 | 7.48E-24 | -0.91 | 1.58E-26 |
| CA9      | -6.02 | 7.52E-24 | -6.78 | 9.10E-32 |
| TLL1     | 1.71  | 7.60E-24 | 1.70  | 8.10E-23 |
| SIRT7    | -1.02 | 7.95E-24 | -0.78 | 3.68E-16 |
| CDH3     | -2.86 | 8.40E-24 | -3.00 | 2.46E-28 |
| CHRNB1   | -1.42 | 8.58E-24 | -1.21 | 1.26E-26 |
| PIGM     | -0.92 | 8.60E-24 | -0.94 | 3.82E-27 |
| MESP1    | -2.64 | 8.86E-24 | -1.81 | 1.00E-16 |
| CPOX     | -1.03 | 1.00E-23 | -0.94 | 6.20E-21 |
| HSD17B4  | 0.85  | 1.03E-23 | 0.81  | 3.60E-17 |
| TJP1     | 0.79  | 1.06E-23 | 0.72  | 1.88E-16 |
| BEST1    | 1.11  | 1.19E-23 | 1.15  | 1.02E-21 |
| SRRT     | -0.78 | 1.22E-23 | -0.64 | 4.85E-22 |
| CEACAM5  | -4.94 | 1.26E-23 | -3.39 | 7.46E-12 |
| LDB3     | 1.71  | 1.34E-23 | 1.91  | 2.31E-18 |
| DAP      | -1.11 | 1.36E-23 | -1.07 | 3.33E-26 |
| CUL7     | -1.00 | 1.46E-23 | -0.72 | 1.68E-20 |
| C2orf40  | 2.69  | 1.55E-23 | 3.55  | 5.07E-42 |
| ICA1     | -1.31 | 1.58E-23 | -1.00 | 2.56E-25 |
| SH3BP5   | 1.21  | 1.63E-23 | 1.29  | 4.78E-28 |
| STX7     | 0.66  | 1.67E-23 | 0.54  | 3.53E-12 |
| TMEM109  | 0.63  | 1.67E-23 | 0.49  | 2.61E-17 |
| NFAM1    | 1.34  | 1.80E-23 | 1.29  | 1.28E-14 |
| GRIN1    | -3.55 | 1.81E-23 | -2.34 | 4.22E-16 |
| RARS     | -0.73 | 2.16E-23 | -0.83 | 1.84E-31 |
| DSN1     | -1.13 | 2.17E-23 | -0.99 | 1.57E-21 |

|          |       |          |       |          |
|----------|-------|----------|-------|----------|
| CTTN     | -0.96 | 2.22E-23 | -0.77 | 8.76E-20 |
| ADSS     | -0.71 | 2.26E-23 | -0.71 | 5.46E-20 |
| PHKG2    | -0.95 | 2.30E-23 | -0.59 | 2.02E-13 |
| S100P    | -5.12 | 2.30E-23 | -3.13 | 3.78E-09 |
| NME2     | -1.31 | 2.42E-23 | -1.19 | 1.24E-34 |
| CRY2     | 1.02  | 2.60E-23 | 1.19  | 7.02E-26 |
| DUSP13   | -6.74 | 2.88E-23 | -4.57 | 2.97E-12 |
| SMPDL3B  | -2.04 | 2.93E-23 | -1.67 | 1.48E-22 |
| TRIM11   | -0.88 | 2.97E-23 | -0.64 | 1.56E-16 |
| XKRX     | -2.96 | 2.97E-23 | -2.09 | 1.46E-13 |
| CCDC86   | -1.02 | 3.01E-23 | -1.02 | 1.09E-31 |
| IL23A    | -2.57 | 3.06E-23 | -2.25 | 1.37E-16 |
| LIMK1    | -1.20 | 3.23E-23 | -1.35 | 2.01E-33 |
| DUSP1    | 1.54  | 3.26E-23 | 1.43  | 1.20E-14 |
| NUPL2    | -0.88 | 3.30E-23 | -0.75 | 1.19E-19 |
| GTPBP3   | -0.99 | 3.38E-23 | -0.72 | 6.51E-13 |
| RACGAP1  | -1.61 | 3.67E-23 | -1.45 | 1.35E-20 |
| NFATC1   | 1.05  | 4.25E-23 | 0.79  | 2.49E-12 |
| IFI30    | 1.09  | 4.34E-23 | 1.06  | 4.51E-15 |
| STAC3    | 1.17  | 4.38E-23 | 1.27  | 8.47E-18 |
| HSP90AB1 | -0.86 | 4.41E-23 | -0.73 | 2.70E-23 |
| LIG1     | -1.01 | 4.45E-23 | -0.84 | 2.94E-18 |
| SPINK1   | -6.70 | 4.60E-23 | -4.77 | 2.51E-17 |
| TSPAN6   | -1.29 | 4.83E-23 | -1.33 | 1.47E-31 |
| CLTC     | -0.69 | 4.90E-23 | -0.71 | 5.42E-29 |
| GPR65    | 1.28  | 4.93E-23 | 1.19  | 1.84E-14 |
| DNAJC2   | -0.94 | 5.29E-23 | -0.93 | 8.62E-29 |
| PROK2    | 2.32  | 5.31E-23 | 1.84  | 2.40E-09 |
| TNFSF11  | -3.99 | 5.41E-23 | -3.37 | 1.63E-24 |
| CLEC4E   | 1.79  | 5.43E-23 | 1.74  | 1.79E-15 |
| KL       | 2.13  | 5.58E-23 | 3.12  | 3.00E-77 |
| APLNR    | 1.47  | 5.60E-23 | 0.94  | 1.22E-05 |
| IRF7     | -1.40 | 5.96E-23 | -1.03 | 2.81E-22 |
| PDZD11   | -1.02 | 5.96E-23 | -1.02 | 3.45E-38 |
| DNAJC10  | -1.03 | 6.37E-23 | -1.05 | 1.79E-36 |
| DTX2     | -1.38 | 6.43E-23 | -1.27 | 3.60E-22 |
| HAVCR1   | -6.33 | 6.52E-23 | -4.54 | 2.10E-14 |
| SBDS     | 0.66  | 6.63E-23 | 0.60  | 7.75E-13 |
| MMP12    | -4.06 | 6.71E-23 | -4.80 | 3.32E-29 |
| PAK6     | -1.25 | 6.91E-23 | -1.10 | 9.47E-19 |
| RASGEF1A | -2.35 | 6.94E-23 | -1.42 | 2.06E-10 |
| GAD1     | -4.26 | 7.71E-23 | -3.54 | 1.74E-26 |
| RORA     | 1.16  | 7.80E-23 | 1.25  | 2.50E-29 |

|         |       |          |       |          |
|---------|-------|----------|-------|----------|
| CNTRF   | 2.69  | 7.92E-23 | 3.33  | 9.06E-27 |
| NONO    | -0.74 | 8.62E-23 | -0.79 | 3.71E-35 |
| USP21   | -0.79 | 8.73E-23 | -0.68 | 8.22E-12 |
| PRKG1   | 1.53  | 9.29E-23 | 1.31  | 2.12E-15 |
| TUBA1C  | -1.24 | 9.46E-23 | -1.22 | 2.31E-27 |
| FANCB   | -1.91 | 9.82E-23 | -1.84 | 1.61E-21 |
| CBX1    | -0.91 | 1.14E-22 | -0.94 | 2.01E-22 |
| CCT6A   | -1.13 | 1.24E-22 | -1.16 | 8.26E-21 |
| LSM12   | -0.77 | 1.29E-22 | -0.83 | 1.18E-39 |
| MTHFD2  | -1.65 | 1.35E-22 | -1.67 | 2.05E-37 |
| SIRPB2  | 1.36  | 1.38E-22 | 1.02  | 3.43E-10 |
| LYPD3   | -3.58 | 1.44E-22 | -2.77 | 5.33E-29 |
| MB      | -3.26 | 1.61E-22 | -3.42 | 1.53E-19 |
| XYLT2   | -0.83 | 1.65E-22 | -0.73 | 3.96E-18 |
| EIF6    | -0.90 | 1.77E-22 | -0.92 | 1.05E-26 |
| PGAM5   | -1.15 | 1.77E-22 | -0.98 | 1.95E-22 |
| KCNJ5   | 1.90  | 1.83E-22 | 2.07  | 5.72E-21 |
| COL5A1  | -2.03 | 1.92E-22 | -2.35 | 2.47E-26 |
| FANCL   | -1.01 | 2.16E-22 | -0.90 | 3.11E-14 |
| TPSB2   | 1.85  | 2.21E-22 | 1.98  | 4.32E-21 |
| SRD5A3  | -1.73 | 2.24E-22 | -1.55 | 1.05E-22 |
| PIK3IP1 | 0.97  | 2.26E-22 | 0.95  | 9.94E-17 |
| ACOT11  | -1.58 | 2.32E-22 | -1.68 | 4.43E-33 |
| UBE2S   | -1.83 | 2.35E-22 | -1.62 | 1.85E-20 |
| DOPEY2  | -0.98 | 2.90E-22 | -0.94 | 1.07E-17 |
| DAB2IP  | 0.91  | 3.01E-22 | 1.02  | 8.14E-26 |
| DLL3    | -7.18 | 3.01E-22 | -5.56 | 6.48E-22 |
| NTRK3   | 1.83  | 3.14E-22 | 2.21  | 6.94E-26 |
| B3GNT2  | 0.79  | 3.40E-22 | 0.67  | 7.50E-14 |
| CCND2   | 1.26  | 3.58E-22 | 1.31  | 5.57E-25 |
| IL11RA  | 1.02  | 3.58E-22 | 1.53  | 1.34E-38 |
| TOM1L1  | -1.03 | 3.67E-22 | -0.90 | 3.57E-18 |
| FBXL3   | 0.69  | 3.77E-22 | 0.57  | 1.14E-13 |
| CD302   | 1.22  | 3.80E-22 | 1.55  | 1.48E-23 |
| SFTPA1  | 2.66  | 3.84E-22 | 4.48  | 9.26E-25 |
| BST1    | 1.29  | 4.43E-22 | 1.21  | 4.52E-23 |
| FGFR1OP | -0.92 | 4.48E-22 | -0.93 | 5.48E-24 |
| C1orf35 | -1.00 | 5.13E-22 | -0.72 | 4.78E-13 |
| PTGES2  | -0.91 | 6.21E-22 | -0.80 | 8.57E-25 |
| ATF3    | 1.67  | 6.72E-22 | 1.63  | 2.09E-15 |
| TARS    | -1.12 | 6.80E-22 | -0.97 | 8.91E-24 |
| PRKCQ   | 1.52  | 7.17E-22 | 1.81  | 2.03E-22 |
| SOCS3   | 1.35  | 7.24E-22 | 0.86  | 1.94E-05 |



|         |       |          |       |          |
|---------|-------|----------|-------|----------|
| SLC15A2 | 1.58  | 7.31E-22 | 2.05  | 2.89E-22 |
| COIL    | -0.67 | 7.49E-22 | -0.64 | 9.95E-21 |
| COL7A1  | -3.75 | 7.51E-22 | -3.01 | 1.47E-21 |
| ARNTL2  | -2.70 | 7.80E-22 | -2.65 | 3.51E-25 |
| ART4    | 2.05  | 7.87E-22 | 2.50  | 2.54E-35 |
| LAMB2   | 0.89  | 8.14E-22 | 1.00  | 1.39E-23 |
| KPNA7   | -2.77 | 8.15E-22 | -2.12 | 2.62E-09 |
| DDX52   | -0.84 | 8.16E-22 | -0.80 | 1.28E-28 |
| STAMBP  | -0.70 | 8.23E-22 | -0.63 | 1.06E-21 |
| GRN     | 0.80  | 8.25E-22 | 0.71  | 1.43E-13 |
| MAP6    | 1.51  | 8.48E-22 | 1.51  | 3.63E-13 |
| BIK     | -2.13 | 8.51E-22 | -1.59 | 4.67E-14 |
| CLDN4   | -1.29 | 8.58E-22 | -1.20 | 5.73E-18 |
| DEFA1B  | 3.66  | 9.20E-22 | 3.79  | 7.28E-20 |
| MAP3K8  | 1.10  | 9.50E-22 | 1.27  | 4.03E-22 |
| POLR3E  | -0.77 | 9.88E-22 | -0.70 | 4.14E-30 |
| SNCA    | 1.48  | 1.02E-21 | 1.58  | 1.67E-28 |
| NDUFS2  | -0.69 | 1.09E-21 | -0.64 | 2.61E-14 |
| TBC1D4  | 0.92  | 1.20E-21 | 1.00  | 4.24E-19 |
| SLC7A11 | -3.16 | 1.23E-21 | -2.40 | 2.54E-17 |
| SLC12A8 | -1.38 | 1.30E-21 | -1.51 | 6.08E-28 |
| ACTL6A  | -1.11 | 1.34E-21 | -1.09 | 4.26E-35 |
| NKRF    | -0.71 | 1.35E-21 | -0.66 | 5.52E-22 |
| RNF182  | 2.14  | 1.37E-21 | 2.78  | 1.37E-31 |
| EFTUD2  | -0.64 | 1.40E-21 | -0.71 | 3.69E-28 |
| MFSD2A  | 1.53  | 1.56E-21 | 1.92  | 7.31E-21 |
| WDR77   | -0.79 | 1.66E-21 | -0.74 | 1.64E-21 |
| DSP     | -2.28 | 1.81E-21 | -2.12 | 2.87E-22 |
| MARS    | -0.93 | 1.81E-21 | -0.87 | 1.44E-33 |
| PLOD1   | -0.91 | 1.85E-21 | -1.02 | 9.56E-29 |
| DNMT3B  | -2.28 | 1.90E-21 | -1.62 | 4.28E-15 |
| NOL6    | -0.83 | 1.94E-21 | -0.74 | 1.27E-19 |
| S100A12 | 2.47  | 1.95E-21 | 2.03  | 1.09E-14 |
| ATP2A2  | -0.84 | 1.98E-21 | -0.84 | 1.77E-19 |
| TRIM45  | -1.45 | 1.99E-21 | -0.94 | 1.89E-09 |
| TPSAB1  | 1.69  | 2.42E-21 | 1.95  | 1.37E-22 |
| PSMB4   | -0.99 | 2.45E-21 | -0.92 | 1.12E-25 |
| RAPGEF1 | 0.70  | 2.61E-21 | 0.58  | 1.67E-11 |
| CDH1    | -1.14 | 2.71E-21 | -1.19 | 6.96E-23 |
| PTX3    | 2.08  | 2.72E-21 | 1.09  | 5.52E-08 |
| CACNB3  | -1.35 | 2.81E-21 | -0.82 | 2.01E-09 |
| WDR74   | -0.83 | 2.90E-21 | -0.64 | 6.05E-17 |
| SEC61A2 | -1.22 | 2.91E-21 | -0.89 | 5.29E-16 |

|          |       |          |       |          |
|----------|-------|----------|-------|----------|
| IL17D    | 1.61  | 2.97E-21 | 2.01  | 2.06E-29 |
| KIF18A   | -1.63 | 2.97E-21 | -1.44 | 1.39E-19 |
| PCNA     | -1.22 | 3.07E-21 | -1.13 | 4.39E-23 |
| PLAU     | -2.52 | 3.18E-21 | -2.56 | 2.05E-25 |
| INCENP   | -1.37 | 3.23E-21 | -1.37 | 2.94E-29 |
| ABCA6    | 1.53  | 3.31E-21 | 1.61  | 2.94E-19 |
| TRUB2    | -0.97 | 3.44E-21 | -0.86 | 1.61E-22 |
| NFIX     | 1.34  | 3.48E-21 | 1.54  | 1.02E-26 |
| SLBP     | -0.87 | 3.50E-21 | -0.74 | 4.09E-21 |
| TRAF2    | -1.11 | 3.65E-21 | -0.80 | 2.51E-17 |
| LPL      | 2.03  | 3.71E-21 | 3.17  | 3.55E-49 |
| FGFR2    | 1.64  | 3.73E-21 | 2.16  | 3.53E-28 |
| SIGLEC16 | 1.68  | 3.73E-21 | 2.11  | 1.56E-23 |
| SRPX     | 1.72  | 3.75E-21 | 1.81  | 8.12E-27 |
| MYO1F    | 1.11  | 3.76E-21 | 1.09  | 1.57E-16 |
| RAB14    | 0.52  | 3.92E-21 | 0.48  | 5.20E-14 |
| LIMD1    | 1.01  | 3.96E-21 | 1.40  | 3.06E-42 |
| INHA     | -6.80 | 4.15E-21 | -2.23 | 2.29E-08 |
| NOP16    | -1.15 | 4.19E-21 | -1.06 | 1.48E-17 |
| SNRPC    | -0.95 | 4.31E-21 | -0.81 | 1.11E-23 |
| PSMC4    | -0.91 | 4.49E-21 | -0.89 | 1.56E-28 |
| DUSP9    | -4.88 | 4.60E-21 | -4.10 | 6.52E-20 |
| SLC39A4  | -1.64 | 4.68E-21 | -1.09 | 1.70E-15 |
| MAOB     | 1.52  | 4.94E-21 | 1.53  | 3.09E-22 |
| MSH2     | -1.09 | 5.01E-21 | -1.01 | 4.20E-20 |
| RNF34    | -0.66 | 5.25E-21 | -0.61 | 7.83E-15 |
| DDX27    | -0.85 | 5.37E-21 | -0.74 | 4.76E-26 |
| FOS      | 1.62  | 5.48E-21 | 1.61  | 4.03E-13 |
| MCM3     | -1.03 | 5.73E-21 | -0.86 | 2.95E-20 |
| IGFBP3   | -2.20 | 5.78E-21 | -1.94 | 1.88E-14 |
| PGLYRP4  | -4.73 | 6.06E-21 | -3.49 | 2.69E-10 |
| PSMB2    | -0.71 | 6.12E-21 | -0.74 | 2.99E-28 |
| FCER1G   | 1.19  | 6.21E-21 | 1.11  | 9.10E-13 |
| MTMR4    | -0.80 | 6.30E-21 | -0.78 | 4.17E-25 |
| PDIA3    | -1.08 | 6.33E-21 | -0.82 | 3.41E-16 |
| KRT8     | -1.42 | 6.39E-21 | -1.20 | 5.73E-17 |
| RAB19    | -1.74 | 6.39E-21 | -1.88 | 4.66E-34 |
| MDH2     | -0.86 | 6.51E-21 | -0.89 | 7.79E-26 |
| MESP2    | -3.34 | 6.72E-21 | -2.56 | 3.51E-21 |
| WBSCR22  | -0.88 | 6.81E-21 | -0.85 | 8.39E-22 |
| SLC35A2  | -1.12 | 7.03E-21 | -1.01 | 4.90E-25 |
| SMAD7    | 0.89  | 7.75E-21 | 1.01  | 2.51E-29 |
| CXCL16   | 0.95  | 7.78E-21 | 0.89  | 1.82E-13 |

|           |       |          |       |          |
|-----------|-------|----------|-------|----------|
| VIL1      | -7.75 | 7.91E-21 | -4.56 | 3.28E-13 |
| SURF4     | -0.63 | 7.97E-21 | -0.64 | 7.84E-19 |
| AGK       | -0.67 | 9.60E-21 | -0.57 | 3.05E-15 |
| IGFL2     | -4.16 | 9.74E-21 | -4.79 | 9.14E-23 |
| UACA      | 0.99  | 1.01E-20 | 0.93  | 8.67E-12 |
| IFNGR1    | 0.94  | 1.03E-20 | 0.66  | 7.48E-12 |
| HGS       | -0.75 | 1.04E-20 | -0.64 | 1.10E-17 |
| MPHOSPH10 | -0.63 | 1.04E-20 | -0.55 | 4.17E-19 |
| ENPP2     | 1.26  | 1.05E-20 | 0.75  | 1.32E-05 |
| DBN1      | -1.22 | 1.08E-20 | -1.37 | 2.86E-20 |
| KDM1A     | -0.79 | 1.08E-20 | -0.78 | 1.22E-24 |
| NEGR1     | 1.67  | 1.09E-20 | 1.90  | 2.16E-25 |
| ARTN      | -3.09 | 1.11E-20 | -1.81 | 3.07E-12 |
| DSG2      | -1.57 | 1.11E-20 | -1.48 | 3.73E-22 |
| IL20RB    | -4.15 | 1.17E-20 | -2.13 | 1.12E-09 |
| ABCC10    | -0.83 | 1.23E-20 | -0.56 | 1.49E-13 |
| IMP4      | -0.83 | 1.23E-20 | -0.73 | 1.02E-18 |
| TAF4      | -0.87 | 1.25E-20 | -0.65 | 1.13E-15 |
| MX2       | -1.62 | 1.27E-20 | -1.41 | 7.63E-23 |
| DOCK8     | 1.12  | 1.33E-20 | 0.98  | 1.66E-14 |
| POP1      | -1.01 | 1.35E-20 | -0.97 | 1.09E-14 |
| IL4I1     | -1.93 | 1.38E-20 | -1.99 | 5.70E-24 |
| SPTB      | -3.23 | 1.38E-20 | -1.84 | 1.10E-07 |
| ZDHHC13   | -0.98 | 1.45E-20 | -0.96 | 3.62E-22 |
| GPX2      | -6.05 | 1.49E-20 | -2.54 | 1.91E-04 |
| TBL2      | -0.79 | 1.53E-20 | -0.87 | 4.46E-26 |
| BRCA1     | -1.60 | 1.54E-20 | -1.38 | 9.60E-19 |
| GBP7      | 2.27  | 1.61E-20 | 2.35  | 6.68E-15 |
| NPEPPS    | -0.74 | 1.61E-20 | -0.76 | 3.45E-25 |
| CALU      | -1.06 | 1.69E-20 | -1.26 | 1.05E-32 |
| PAEP      | -8.11 | 1.70E-20 | -5.66 | 2.07E-19 |
| PLOD2     | -2.10 | 1.74E-20 | -1.61 | 5.74E-13 |
| BCL2A1    | 1.36  | 1.93E-20 | 1.18  | 3.91E-11 |
| CAPN5     | -2.07 | 2.02E-20 | -1.14 | 2.04E-08 |
| FAT4      | 1.36  | 2.11E-20 | 1.37  | 3.53E-22 |
| SFTPA2    | 2.55  | 2.16E-20 | 4.33  | 1.56E-22 |
| CD37      | 1.19  | 2.27E-20 | 1.12  | 9.07E-13 |
| FASTK     | -0.95 | 2.27E-20 | -0.70 | 1.10E-18 |
| SIGLEC14  | 1.49  | 2.27E-20 | 1.19  | 8.93E-14 |
| WDR3      | -0.85 | 2.30E-20 | -0.85 | 2.53E-21 |
| CKAP5     | -0.91 | 2.42E-20 | -0.98 | 7.51E-28 |
| CLDN3     | -2.11 | 2.58E-20 | -1.53 | 5.38E-10 |
| MYL6B     | -1.18 | 2.67E-20 | -1.03 | 1.42E-22 |

|           |       |          |       |          |
|-----------|-------|----------|-------|----------|
| RASGRF1   | 2.27  | 2.68E-20 | 3.29  | 3.93E-26 |
| ADCYAP1R1 | 2.49  | 2.86E-20 | 1.98  | 6.67E-11 |
| LRRC25    | 1.13  | 2.86E-20 | 0.95  | 6.27E-11 |
| FOXA3     | -3.21 | 2.88E-20 | -1.95 | 3.28E-10 |
| TRAF5     | -1.31 | 3.18E-20 | -1.06 | 4.19E-19 |
| PRKDC     | -1.17 | 3.45E-20 | -1.23 | 7.76E-26 |
| IL1RAPL2  | -5.66 | 3.52E-20 | -4.52 | 3.17E-21 |
| CISD2     | -0.84 | 3.65E-20 | -0.87 | 1.41E-24 |
| RDX       | 0.89  | 3.65E-20 | 0.79  | 2.05E-17 |
| LMNB2     | -1.13 | 3.83E-20 | -1.13 | 4.26E-19 |
| GTPBP4    | -0.93 | 3.85E-20 | -0.85 | 1.16E-20 |
| ABCA4     | -4.14 | 4.54E-20 | -1.65 | 6.56E-05 |
| FOXO4     | 0.79  | 4.79E-20 | 0.84  | 1.58E-19 |
| GNG11     | 1.56  | 4.81E-20 | 1.90  | 2.31E-29 |
| FADD      | -0.81 | 4.96E-20 | -0.85 | 5.59E-23 |
| SHC1      | -0.93 | 5.02E-20 | -0.93 | 7.37E-23 |
| PRPF3     | -0.84 | 5.05E-20 | -0.69 | 1.12E-12 |
| RHBDD3    | -1.06 | 5.21E-20 | -0.70 | 1.19E-10 |
| MSH6      | -0.92 | 5.35E-20 | -0.91 | 9.65E-22 |
| NRK       | -4.07 | 5.36E-20 | -2.63 | 4.42E-15 |
| DDR1      | -0.98 | 5.43E-20 | -0.77 | 2.21E-13 |
| KLRF1     | 1.78  | 5.78E-20 | 1.88  | 1.60E-10 |
| SCARA5    | 2.43  | 6.29E-20 | 3.54  | 6.43E-24 |
| HNRNPC    | -0.68 | 6.45E-20 | -0.68 | 1.17E-24 |
| ARRB1     | 1.03  | 6.66E-20 | 1.34  | 2.84E-37 |
| NCF1      | 1.35  | 7.04E-20 | 1.25  | 1.72E-12 |
| CLPTMIL   | -1.11 | 7.18E-20 | -0.91 | 2.60E-17 |
| FKBP3     | -1.09 | 7.37E-20 | -0.88 | 6.36E-25 |
| NUDT1     | -1.14 | 7.59E-20 | -0.97 | 3.64E-18 |
| CACYBP    | -0.95 | 7.70E-20 | -0.91 | 3.36E-23 |
| SGMS2     | 1.15  | 7.87E-20 | 0.96  | 5.39E-09 |
| LONRF1    | 0.82  | 7.89E-20 | 0.84  | 9.18E-15 |
| CXCL3     | 1.93  | 7.98E-20 | 2.09  | 1.15E-14 |
| FBLN1     | 1.26  | 8.29E-20 | 1.03  | 1.34E-10 |
| AGR2      | -2.48 | 8.86E-20 | -1.69 | 5.30E-08 |
| SPINT2    | -1.17 | 8.93E-20 | -1.04 | 6.81E-26 |
| CASP3     | -0.78 | 8.96E-20 | -0.83 | 2.51E-26 |
| SRF       | 0.60  | 8.99E-20 | 0.53  | 8.10E-12 |
| PRSS3     | -5.77 | 9.08E-20 | -3.94 | 3.35E-15 |
| TRIM31    | -4.61 | 9.72E-20 | -2.18 | 2.07E-08 |
| SIX1      | -2.54 | 9.78E-20 | -2.53 | 3.66E-16 |
| GNL2      | -0.68 | 1.01E-19 | -0.65 | 1.51E-17 |
| SFTPD     | 2.23  | 1.03E-19 | 3.81  | 7.69E-25 |

|            |       |          |       |          |
|------------|-------|----------|-------|----------|
| INSL3      | -2.03 | 1.07E-19 | -2.08 | 6.53E-20 |
| SAC3D1     | -1.14 | 1.07E-19 | -1.03 | 9.31E-23 |
| GNGT1      | -5.57 | 1.10E-19 | -4.35 | 4.47E-12 |
| MAGED4     | -2.52 | 1.25E-19 | -1.99 | 8.60E-18 |
| TLK1       | -0.63 | 1.31E-19 | -0.64 | 9.23E-27 |
| HHIP       | 2.71  | 1.38E-19 | 3.96  | 2.40E-31 |
| CXCL14     | -4.48 | 1.39E-19 | -2.46 | 1.13E-12 |
| SGCB       | 0.90  | 1.43E-19 | 0.68  | 6.52E-12 |
| TSPAN12    | 1.13  | 1.46E-19 | 1.52  | 2.99E-26 |
| FERMT3     | 1.09  | 1.47E-19 | 0.92  | 1.52E-11 |
| ARG1       | 2.82  | 1.50E-19 | 2.03  | 2.51E-08 |
| FCGR3A     | 1.30  | 1.50E-19 | 1.28  | 4.39E-11 |
| NFXL1      | -0.94 | 1.50E-19 | -0.86 | 7.91E-20 |
| ZBTB16     | 2.28  | 1.52E-19 | 3.11  | 8.12E-36 |
| HBD        | 2.48  | 1.54E-19 | 1.78  | 3.56E-07 |
| GNB3       | -2.02 | 1.65E-19 | -1.57 | 3.75E-13 |
| YTHDF1     | -0.69 | 1.66E-19 | -0.57 | 1.05E-22 |
| SCAMP3     | -0.75 | 1.68E-19 | -0.73 | 7.33E-20 |
| IRF3       | -0.75 | 1.69E-19 | -0.42 | 2.03E-11 |
| HPRT1      | -1.16 | 1.70E-19 | -1.13 | 2.98E-39 |
| RTEL1      | -1.16 | 1.70E-19 | -0.82 | 5.69E-15 |
| XRCC3      | -1.15 | 1.71E-19 | -0.86 | 1.02E-12 |
| DUOXA1     | 1.91  | 1.74E-19 | 2.92  | 5.35E-27 |
| SCG5       | -3.06 | 1.74E-19 | -2.67 | 1.07E-18 |
| GJB6       | -5.06 | 1.80E-19 | -3.74 | 1.28E-12 |
| CD53       | 1.09  | 1.83E-19 | 0.96  | 1.76E-10 |
| FRK        | -1.20 | 1.83E-19 | -1.36 | 1.37E-24 |
| SIGLEC7    | 1.28  | 1.95E-19 | 0.96  | 1.70E-08 |
| PRCD       | 1.12  | 2.02E-19 | 1.44  | 6.50E-22 |
| POLE       | -1.13 | 2.15E-19 | -0.82 | 4.92E-10 |
| MUC20      | -2.35 | 2.18E-19 | -1.49 | 1.46E-10 |
| RGS14      | -1.13 | 2.20E-19 | -0.95 | 3.42E-18 |
| MMP3       | -4.68 | 2.30E-19 | -4.70 | 7.55E-20 |
| HIST2H2AA3 | -2.11 | 2.41E-19 | -1.54 | 2.16E-14 |
| COL17A1    | -4.24 | 2.43E-19 | -3.68 | 6.03E-16 |
| RAMP1      | -2.22 | 2.47E-19 | -1.78 | 6.84E-25 |
| LAIR1      | 1.16  | 2.78E-19 | 1.05  | 5.30E-10 |
| SLCO1A2    | 3.60  | 2.86E-19 | 5.92  | 7.62E-50 |
| FKBP4      | -1.26 | 2.93E-19 | -1.01 | 8.61E-23 |
| JAM3       | 1.20  | 2.93E-19 | 1.04  | 1.50E-11 |
| SMARCA2    | 0.85  | 3.07E-19 | 0.79  | 4.09E-21 |
| UGGT1      | -0.78 | 3.27E-19 | -0.87 | 6.08E-34 |
| CARD8      | 0.65  | 3.36E-19 | 0.71  | 6.60E-20 |

|          |       |          |       |          |
|----------|-------|----------|-------|----------|
| ZBTB12   | -1.39 | 3.37E-19 | -1.16 | 3.63E-15 |
| PCGF3    | -0.77 | 3.49E-19 | -0.52 | 1.42E-09 |
| NFATC4   | -1.33 | 3.52E-19 | -0.74 | 2.18E-10 |
| CDKN2A   | -3.47 | 3.54E-19 | -2.62 | 1.93E-17 |
| JUNB     | 1.07  | 3.81E-19 | 0.89  | 2.08E-09 |
| CCDC65   | 2.15  | 4.07E-19 | 2.45  | 1.70E-14 |
| EHMT2    | -0.91 | 4.40E-19 | -0.71 | 3.05E-18 |
| PACRG    | 2.33  | 4.69E-19 | 3.06  | 2.23E-17 |
| DUSP12   | -0.66 | 4.70E-19 | -0.60 | 1.62E-10 |
| GPC3     | 1.86  | 4.80E-19 | 2.61  | 1.91E-29 |
| LCP1     | 1.11  | 4.88E-19 | 0.96  | 1.12E-11 |
| MEST     | -1.38 | 5.13E-19 | -1.42 | 2.52E-23 |
| KRT18    | -1.32 | 5.39E-19 | -1.02 | 4.65E-15 |
| SEC61G   | -1.06 | 5.39E-19 | -1.09 | 7.78E-18 |
| SYT2     | -3.37 | 5.44E-19 | -1.17 | 1.43E-05 |
| MYL3     | 1.78  | 5.55E-19 | 1.96  | 1.75E-15 |
| STAT5B   | 0.51  | 5.57E-19 | 0.44  | 7.23E-12 |
| MATK     | 1.32  | 5.61E-19 | 1.27  | 5.97E-17 |
| AATF     | -0.67 | 5.68E-19 | -0.62 | 3.42E-18 |
| TSPAN14  | 0.53  | 5.77E-19 | 0.45  | 3.33E-13 |
| CLIC4    | 0.81  | 5.82E-19 | 0.46  | 4.71E-06 |
| PLA2G5   | 1.26  | 6.48E-19 | 1.10  | 3.27E-13 |
| TWF1     | -1.00 | 6.48E-19 | -0.98 | 8.01E-21 |
| SLC25A15 | -1.04 | 6.78E-19 | -0.90 | 2.02E-19 |
| TSLP     | 1.73  | 6.78E-19 | 2.09  | 4.90E-25 |
| CARD11   | -1.94 | 6.97E-19 | -1.83 | 1.20E-21 |
| RAB34    | -0.97 | 7.43E-19 | -0.75 | 1.43E-18 |
| TNNI2    | 1.83  | 7.52E-19 | 2.56  | 3.46E-29 |
| SPINT1   | -1.01 | 7.56E-19 | -0.76 | 8.00E-12 |
| PRSS50   | -3.69 | 7.90E-19 | -2.38 | 6.68E-09 |
| ZNF438   | 0.58  | 8.02E-19 | 0.52  | 6.65E-16 |
| SH2D1B   | 1.75  | 8.35E-19 | 1.96  | 9.24E-15 |
| SEC24A   | -0.73 | 8.38E-19 | -0.88 | 3.84E-29 |
| RAE1     | -0.87 | 8.49E-19 | -0.83 | 1.29E-21 |
| OPLAH    | -1.54 | 8.95E-19 | -0.97 | 2.38E-09 |
| TRPV1    | -1.60 | 9.40E-19 | -0.79 | 1.51E-07 |
| GALE     | -1.18 | 9.46E-19 | -0.84 | 5.09E-12 |
| MOV10    | -0.79 | 9.74E-19 | -0.73 | 9.42E-18 |
| CXCL12   | 1.27  | 9.76E-19 | 1.02  | 7.30E-10 |
| LYL1     | 0.98  | 9.76E-19 | 0.87  | 3.96E-15 |
| UNG      | -0.94 | 9.82E-19 | -0.89 | 1.33E-18 |
| RAB15    | -1.63 | 9.83E-19 | -1.07 | 5.36E-12 |
| TFF1     | -9.12 | 1.02E-18 | -4.72 | 9.55E-12 |

|           |       |          |       |          |
|-----------|-------|----------|-------|----------|
| PIAS1     | 0.57  | 1.10E-18 | 0.52  | 9.47E-19 |
| CCL2      | 1.44  | 1.16E-18 | 0.51  | 2.52E-02 |
| HOXB9     | -7.52 | 1.19E-18 | -5.11 | 3.51E-23 |
| TRMT2A    | -0.89 | 1.39E-18 | -0.55 | 2.07E-10 |
| IL22RA2   | -3.63 | 1.49E-18 | -4.51 | 7.91E-27 |
| E2F1      | -1.56 | 1.53E-18 | -1.13 | 1.48E-12 |
| GRHL2     | -1.02 | 1.53E-18 | -0.81 | 2.27E-19 |
| MUC13     | -5.96 | 1.53E-18 | -3.90 | 1.79E-10 |
| ATP6V1B2  | 0.61  | 1.57E-18 | 0.38  | 5.88E-06 |
| ERCC3     | -0.47 | 1.57E-18 | -0.41 | 5.04E-11 |
| PAAF1     | -0.84 | 1.62E-18 | -0.70 | 1.14E-18 |
| TNFAIP3   | 1.12  | 1.62E-18 | 0.61  | 5.50E-05 |
| CHMP4B    | -0.64 | 1.63E-18 | -0.50 | 4.35E-15 |
| ITGAL     | 1.18  | 1.67E-18 | 1.40  | 1.24E-16 |
| APEX1     | -0.85 | 1.68E-18 | -0.80 | 1.38E-24 |
| CLEC6A    | 2.06  | 1.73E-18 | 1.83  | 1.17E-07 |
| ABCB1     | 1.55  | 1.80E-18 | 1.59  | 4.00E-12 |
| EPYC      | -6.06 | 1.91E-18 | -4.45 | 3.65E-14 |
| CDH17     | -5.72 | 1.99E-18 | -1.99 | 3.29E-07 |
| TUBB2B    | -4.27 | 2.08E-18 | -2.43 | 8.66E-10 |
| CHMP4C    | -1.20 | 2.10E-18 | -0.98 | 3.57E-21 |
| POU4F1    | -5.63 | 2.16E-18 | -3.80 | 8.45E-11 |
| PSMD3     | -0.77 | 2.25E-18 | -0.71 | 1.06E-24 |
| PSMD14    | -0.92 | 2.27E-18 | -0.93 | 1.16E-25 |
| UBE2Q1    | -0.63 | 2.30E-18 | -0.56 | 1.11E-15 |
| ZIC2      | -5.54 | 2.32E-18 | -4.20 | 3.88E-15 |
| ZP3       | -1.70 | 2.33E-18 | -1.55 | 2.75E-20 |
| ACR       | 1.66  | 2.34E-18 | 1.64  | 6.94E-12 |
| TRIM2     | -1.52 | 2.38E-18 | -1.08 | 3.07E-12 |
| GABARAPL1 | 0.96  | 2.47E-18 | 1.09  | 1.39E-24 |
| GJC2      | 1.31  | 2.47E-18 | 1.56  | 1.46E-20 |
| C8B       | 2.95  | 2.53E-18 | 5.21  | 4.65E-34 |
| ACAD8     | -1.43 | 2.62E-18 | -0.82 | 1.35E-11 |
| CNKSR2    | 1.97  | 2.69E-18 | 2.28  | 1.47E-19 |
| BAK1      | -0.87 | 2.73E-18 | -0.82 | 3.93E-21 |
| LRRK2     | 1.97  | 2.73E-18 | 3.15  | 3.63E-30 |
| APOBEC3B  | -2.41 | 2.91E-18 | -2.14 | 5.08E-25 |
| SYNE1     | 1.17  | 2.94E-18 | 1.39  | 1.27E-21 |
| IL11      | -2.80 | 2.95E-18 | -2.97 | 4.75E-23 |
| ADAR      | -0.65 | 3.04E-18 | -0.74 | 4.34E-20 |
| RPS6KB2   | -0.77 | 3.10E-18 | -0.68 | 6.61E-17 |
| PACSIN1   | -2.52 | 3.13E-18 | -2.49 | 2.87E-23 |
| SSRP1     | -0.71 | 3.46E-18 | -0.74 | 3.27E-28 |

|           |       |          |       |          |
|-----------|-------|----------|-------|----------|
| GRIN2D    | -2.87 | 3.63E-18 | -1.64 | 4.18E-10 |
| DNMT1     | -0.96 | 3.73E-18 | -0.94 | 5.36E-18 |
| RFC2      | -0.95 | 3.82E-18 | -0.92 | 7.78E-22 |
| HGD       | -4.18 | 3.86E-18 | -2.00 | 6.75E-06 |
| TMEM216   | -0.77 | 3.89E-18 | -0.72 | 2.74E-20 |
| STK10     | 0.80  | 4.23E-18 | 0.54  | 3.68E-08 |
| SRGN      | 1.17  | 4.42E-18 | 0.96  | 1.32E-10 |
| DHFR      | -0.98 | 4.45E-18 | -0.97 | 3.70E-20 |
| FGB       | -8.93 | 4.53E-18 | -3.25 | 6.24E-05 |
| ATP1B2    | 1.40  | 4.66E-18 | 1.66  | 5.85E-22 |
| HMGA2     | -5.64 | 4.92E-18 | -3.70 | 1.37E-10 |
| ARL6      | 0.84  | 5.03E-18 | 0.61  | 9.99E-06 |
| NPR2      | 0.88  | 5.12E-18 | 0.96  | 1.20E-12 |
| UCHL1     | -3.71 | 5.41E-18 | -2.18 | 1.26E-12 |
| SDAD1     | -0.58 | 5.52E-18 | -0.65 | 5.15E-30 |
| GPR35     | -2.62 | 5.63E-18 | -1.13 | 3.95E-06 |
| VPS45     | -0.68 | 5.64E-18 | -0.66 | 3.80E-17 |
| CDC7      | -1.42 | 6.03E-18 | -1.28 | 4.46E-18 |
| RGS13     | 1.72  | 6.08E-18 | 1.98  | 9.65E-22 |
| YY1       | -0.62 | 6.33E-18 | -0.56 | 5.23E-25 |
| EXOSC4    | -1.15 | 6.50E-18 | -0.97 | 3.25E-18 |
| CASP2     | -0.69 | 6.51E-18 | -0.78 | 6.32E-19 |
| AIM2      | -2.84 | 6.67E-18 | -2.44 | 8.00E-14 |
| FBXO7     | 0.41  | 6.84E-18 | 0.38  | 7.92E-09 |
| AP1M2     | -0.89 | 7.11E-18 | -0.72 | 2.09E-15 |
| TMCO1     | -0.80 | 7.27E-18 | -0.80 | 1.44E-21 |
| THPO      | -3.64 | 7.30E-18 | -1.14 | 1.26E-04 |
| F11       | 2.89  | 7.35E-18 | 5.45  | 1.22E-28 |
| POLB      | -1.22 | 7.37E-18 | -1.02 | 1.09E-17 |
| MCCC2     | -0.79 | 7.44E-18 | -0.77 | 4.85E-22 |
| DGAT1     | -1.08 | 7.56E-18 | -0.73 | 1.44E-11 |
| SORT1     | 0.79  | 7.95E-18 | 0.71  | 1.08E-10 |
| CARS      | -0.64 | 8.00E-18 | -0.65 | 9.98E-20 |
| CECR1     | 1.04  | 8.15E-18 | 0.89  | 1.46E-09 |
| HIST1H2BG | -3.47 | 8.27E-18 | -2.77 | 7.46E-08 |
| MYOM2     | 1.47  | 8.42E-18 | 1.86  | 5.33E-24 |
| CFB       | -2.03 | 8.50E-18 | -1.66 | 6.46E-14 |
| PAFAH1B1  | 0.48  | 8.76E-18 | 0.42  | 9.04E-13 |
| MTM1      | 0.68  | 9.15E-18 | 0.66  | 7.79E-21 |
| ABCC2     | -5.41 | 9.24E-18 | -1.18 | 1.74E-03 |
| RANGAP1   | -0.75 | 9.62E-18 | -0.69 | 6.18E-13 |
| CARM1     | -0.62 | 9.75E-18 | -0.63 | 4.10E-22 |
| GALC      | 0.74  | 9.90E-18 | 0.69  | 7.63E-15 |



|           |       |          |       |          |
|-----------|-------|----------|-------|----------|
| SIGMAR1   | -0.84 | 1.07E-17 | -0.76 | 5.47E-22 |
| ELMOD1    | 1.80  | 1.08E-17 | 2.26  | 3.59E-13 |
| SYNJ2BP   | 0.52  | 1.08E-17 | 0.51  | 1.31E-15 |
| HECW2     | 1.09  | 1.10E-17 | 1.17  | 3.27E-16 |
| IL5RA     | 2.03  | 1.13E-17 | 2.09  | 4.66E-11 |
| POLM      | -0.84 | 1.17E-17 | -0.69 | 1.42E-14 |
| C7        | 1.79  | 1.18E-17 | 2.20  | 1.37E-17 |
| MUC21     | -3.94 | 1.18E-17 | -2.05 | 8.90E-06 |
| ESPN      | -2.58 | 1.20E-17 | -2.26 | 1.37E-12 |
| PPP2CB    | 0.65  | 1.20E-17 | 0.73  | 6.12E-18 |
| CACNA2D2  | 2.13  | 1.24E-17 | 3.76  | 6.57E-23 |
| CYB5R3    | 0.68  | 1.27E-17 | 0.68  | 1.20E-16 |
| FOXH1     | -3.72 | 1.28E-17 | -1.62 | 1.25E-06 |
| IL17C     | -4.30 | 1.28E-17 | -2.59 | 1.39E-07 |
| PABPC4    | -0.72 | 1.31E-17 | -0.58 | 6.13E-15 |
| PPP1R16B  | 1.22  | 1.31E-17 | 1.16  | 1.39E-11 |
| FNDC4     | -2.15 | 1.33E-17 | -1.72 | 9.92E-18 |
| PDGFRL    | -1.63 | 1.51E-17 | -1.58 | 2.31E-15 |
| AHCY      | -1.04 | 1.56E-17 | -1.04 | 1.83E-29 |
| ALOXE3    | -2.91 | 1.57E-17 | -2.42 | 1.50E-13 |
| TNFAIP8L3 | 1.17  | 1.69E-17 | 1.00  | 5.90E-14 |
| RHBDF2    | -0.97 | 1.79E-17 | -1.01 | 6.96E-23 |
| RRS1      | -1.17 | 1.95E-17 | -0.92 | 4.31E-14 |
| EED       | -0.70 | 1.96E-17 | -0.73 | 7.87E-19 |
| EGF       | -2.58 | 1.97E-17 | -1.95 | 1.44E-11 |
| DUSP3     | 0.56  | 2.04E-17 | 0.48  | 6.32E-11 |
| GBP4      | 1.31  | 2.04E-17 | 1.43  | 1.85E-13 |
| PNPT1     | -0.84 | 2.08E-17 | -0.67 | 2.47E-16 |
| NUP43     | -0.65 | 2.13E-17 | -0.70 | 4.45E-22 |
| EIF4A3    | -0.79 | 2.17E-17 | -0.75 | 1.84E-23 |
| PLA2G4A   | -2.52 | 2.17E-17 | -1.57 | 2.53E-11 |
| JAK2      | 0.82  | 2.21E-17 | 0.70  | 8.33E-13 |
| GNG2      | 0.88  | 2.25E-17 | 0.62  | 4.30E-08 |
| SMARCB1   | -0.63 | 2.25E-17 | -0.58 | 2.25E-19 |
| EBNA1BP2  | -0.77 | 2.37E-17 | -0.77 | 1.54E-21 |
| COMP      | -3.14 | 2.47E-17 | -3.41 | 1.11E-18 |
| USP28     | -0.92 | 2.54E-17 | -0.67 | 4.43E-16 |
| FCRL5     | -2.43 | 2.59E-17 | -2.76 | 1.61E-22 |
| TBXA2R    | 0.95  | 2.64E-17 | 0.68  | 2.94E-06 |
| CD81      | 0.74  | 2.75E-17 | 0.83  | 2.91E-20 |
| SNRNP200  | -0.67 | 2.75E-17 | -0.71 | 1.58E-21 |
| HIST1H1D  | -3.53 | 2.81E-17 | -3.17 | 1.03E-12 |
| SEC31A    | -0.53 | 2.94E-17 | -0.58 | 2.25E-20 |

|            |       |          |       |          |
|------------|-------|----------|-------|----------|
| MEA1       | -0.79 | 2.97E-17 | -0.62 | 1.41E-17 |
| ERGIC3     | -0.70 | 3.10E-17 | -0.70 | 1.74E-17 |
| CDK4       | -1.05 | 3.20E-17 | -1.01 | 2.23E-17 |
| CLDN10     | -4.20 | 3.25E-17 | -2.83 | 4.16E-08 |
| LAT2       | 1.03  | 3.30E-17 | 0.87  | 3.28E-10 |
| NPR3       | 1.54  | 3.31E-17 | 1.61  | 3.96E-13 |
| SEZ6L2     | -1.84 | 3.44E-17 | -1.53 | 3.38E-14 |
| ST6GALNAC2 | 1.47  | 3.47E-17 | 1.71  | 5.70E-23 |
| GOT1       | -1.09 | 3.50E-17 | -0.84 | 8.13E-22 |
| TTC9C      | -0.77 | 3.53E-17 | -0.65 | 5.29E-19 |
| TBCE       | -0.85 | 3.74E-17 | -0.66 | 5.09E-12 |
| ENDOU      | 1.68  | 3.77E-17 | 2.45  | 6.44E-24 |
| RSPH9      | 1.88  | 3.77E-17 | 1.87  | 2.47E-09 |
| ADAM15     | -1.02 | 3.79E-17 | -1.06 | 5.25E-22 |
| CEACAM7    | -3.90 | 3.94E-17 | -2.45 | 1.67E-09 |
| CPA3       | 1.67  | 4.21E-17 | 1.98  | 3.30E-20 |
| CTSS       | 0.95  | 4.53E-17 | 0.77  | 8.07E-09 |
| JUN        | 0.97  | 4.92E-17 | 0.79  | 2.02E-07 |
| SNRPD1     | -0.94 | 4.95E-17 | -0.87 | 1.37E-18 |
| MUSK       | 2.02  | 5.08E-17 | 2.63  | 7.78E-19 |
| SLC22A4    | 1.48  | 5.10E-17 | 1.22  | 2.64E-07 |
| GNA11      | 0.68  | 5.24E-17 | 0.45  | 8.91E-08 |
| IL20RA     | 1.66  | 5.48E-17 | 1.59  | 1.26E-12 |
| CNGB1      | -3.16 | 5.49E-17 | -1.34 | 9.06E-05 |
| GFAP       | -3.41 | 5.59E-17 | -2.50 | 1.83E-13 |
| ANXA6      | 0.73  | 5.64E-17 | 0.35  | 1.61E-04 |
| NUP210     | -1.19 | 5.65E-17 | -1.05 | 3.05E-14 |
| HCST       | 1.11  | 5.75E-17 | 1.03  | 2.64E-13 |
| GAB2       | 0.93  | 5.81E-17 | 1.00  | 2.26E-19 |
| BMP8B      | -1.47 | 5.97E-17 | -1.15 | 1.37E-16 |
| AKAP13     | 0.93  | 6.05E-17 | 0.93  | 4.00E-16 |
| CYP2D6     | -2.99 | 6.08E-17 | -1.21 | 1.04E-05 |
| TNFAIP1    | 0.51  | 6.09E-17 | 0.45  | 6.32E-09 |
| CX3CR1     | 1.55  | 6.12E-17 | 1.86  | 1.25E-19 |
| MBP        | 0.76  | 6.27E-17 | 0.55  | 3.73E-11 |
| PLCE1      | 1.34  | 6.29E-17 | 1.72  | 1.69E-24 |
| RP2        | 0.68  | 6.41E-17 | 0.41  | 6.96E-07 |
| TRIB3      | -1.48 | 6.46E-17 | -0.94 | 1.31E-10 |
| TCN1       | -6.63 | 6.61E-17 | -4.52 | 1.22E-12 |
| ZMYND10    | 2.09  | 6.73E-17 | 2.63  | 2.54E-14 |
| PTK6       | -1.87 | 7.01E-17 | -0.96 | 4.46E-06 |
| AHCTF1     | -0.69 | 7.11E-17 | -0.65 | 1.55E-21 |
| TRIM35     | 0.57  | 7.33E-17 | 0.55  | 1.33E-14 |

|           |       |          |       |          |
|-----------|-------|----------|-------|----------|
| CD163     | 1.32  | 7.39E-17 | 0.99  | 9.25E-06 |
| FAM134B   | 1.53  | 7.66E-17 | 1.44  | 5.63E-15 |
| CBLB      | -0.78 | 7.90E-17 | -0.80 | 6.10E-22 |
| LEFTY2    | 1.88  | 7.90E-17 | 2.49  | 8.86E-17 |
| APEX2     | -0.63 | 7.93E-17 | -0.77 | 2.23E-27 |
| PSMA5     | -0.81 | 8.20E-17 | -0.84 | 2.56E-23 |
| FBXL20    | -0.89 | 8.37E-17 | -0.64 | 1.13E-10 |
| POLR2J    | -0.86 | 8.95E-17 | -0.72 | 1.35E-21 |
| CHST15    | -1.05 | 9.29E-17 | -1.15 | 2.93E-25 |
| USP12     | 0.78  | 9.35E-17 | 0.77  | 3.96E-18 |
| ASCC3     | -0.70 | 9.40E-17 | -0.87 | 8.47E-32 |
| F10       | 1.51  | 9.40E-17 | 2.07  | 1.40E-41 |
| TMUB1     | -0.89 | 9.46E-17 | -0.60 | 1.54E-11 |
| COL13A1   | 1.41  | 9.49E-17 | 1.79  | 3.60E-22 |
| CAPN11    | 1.49  | 9.58E-17 | 1.39  | 5.03E-11 |
| P4HA1     | -1.02 | 9.64E-17 | -0.87 | 1.67E-14 |
| AZI2      | 0.44  | 9.72E-17 | 0.33  | 1.20E-06 |
| MARK2     | -0.65 | 1.02E-16 | -0.62 | 6.14E-23 |
| STAT5A    | 0.73  | 1.02E-16 | 0.55  | 4.49E-13 |
| EYS       | -2.79 | 1.08E-16 | -1.23 | 4.84E-08 |
| EXOSC2    | -0.72 | 1.13E-16 | -0.62 | 5.75E-16 |
| CHRNB4    | -2.96 | 1.15E-16 | -3.25 | 4.33E-20 |
| HIST1H2BK | -1.44 | 1.16E-16 | -1.08 | 8.55E-13 |
| CPT1B     | -1.75 | 1.21E-16 | -0.77 | 1.64E-04 |
| OSTF1     | 0.55  | 1.25E-16 | 0.45  | 3.89E-11 |
| DUSP4     | -2.33 | 1.27E-16 | -1.84 | 9.06E-17 |
| PSME4     | -0.66 | 1.35E-16 | -0.73 | 1.33E-20 |
| URB2      | -0.83 | 1.53E-16 | -0.99 | 9.53E-23 |
| HNRNPA2B1 | -0.52 | 1.56E-16 | -0.52 | 2.58E-17 |
| MAGED4B   | -2.29 | 1.59E-16 | -1.87 | 5.49E-14 |
| ID3       | 1.08  | 1.60E-16 | 1.09  | 5.15E-17 |
| HIST1H2BC | -2.08 | 1.61E-16 | -1.27 | 3.70E-10 |
| VDAC1     | -0.75 | 1.63E-16 | -0.77 | 4.67E-22 |
| VAMP3     | 0.50  | 1.71E-16 | 0.36  | 1.42E-09 |
| SP3       | -0.50 | 1.75E-16 | -0.51 | 4.37E-17 |
| B4GALT7   | -0.78 | 1.78E-16 | -0.77 | 5.69E-20 |
| LAMA4     | 0.98  | 1.84E-16 | 0.63  | 1.66E-04 |
| MTHFD1    | -0.76 | 1.86E-16 | -0.77 | 7.68E-23 |
| B4GALNT1  | -2.90 | 1.92E-16 | -2.19 | 1.03E-15 |
| GNG4      | -3.97 | 1.98E-16 | -3.39 | 1.81E-17 |
| EVI5      | 0.58  | 2.00E-16 | 0.53  | 2.05E-18 |
| PDCD11    | -0.77 | 2.02E-16 | -0.78 | 3.59E-18 |
| PFAS      | -0.88 | 2.02E-16 | -0.66 | 4.26E-13 |

|           |       |          |       |          |
|-----------|-------|----------|-------|----------|
| FO XK2    | -0.64 | 2.12E-16 | -0.56 | 2.10E-16 |
| CSF2RB    | 1.07  | 2.13E-16 | 0.89  | 6.13E-10 |
| TOMM40    | -0.87 | 2.15E-16 | -0.93 | 1.26E-18 |
| SLC20A1   | -0.97 | 2.22E-16 | -0.99 | 1.47E-19 |
| CYTH1     | 0.54  | 2.31E-16 | 0.63  | 1.25E-16 |
| ADSSL1    | -1.82 | 2.35E-16 | -1.24 | 1.63E-11 |
| RRP1B     | -0.68 | 2.35E-16 | -0.74 | 3.38E-26 |
| ERBB4     | 1.90  | 2.37E-16 | 2.99  | 1.42E-26 |
| IRF8      | 1.11  | 2.37E-16 | 1.04  | 3.91E-12 |
| NKX3-2    | -3.45 | 2.38E-16 | -3.25 | 1.55E-12 |
| WFDC2     | -1.93 | 2.38E-16 | -1.48 | 1.10E-09 |
| PWP2      | -0.65 | 2.39E-16 | -0.59 | 1.35E-16 |
| ABCB4     | -2.61 | 2.41E-16 | -1.90 | 2.22E-16 |
| APLN      | 1.52  | 2.51E-16 | 1.33  | 2.67E-08 |
| HIST1H2BE | -1.61 | 2.52E-16 | -1.24 | 1.55E-11 |
| PRMT5     | -0.81 | 2.52E-16 | -0.82 | 7.66E-24 |
| PAK1IP1   | -0.97 | 2.60E-16 | -0.87 | 1.46E-22 |
| HMOX1     | 1.24  | 2.64E-16 | 0.57  | 3.22E-04 |
| RUNX1T1   | 1.38  | 2.65E-16 | 1.19  | 1.33E-09 |
| DIABLO    | -0.78 | 2.80E-16 | -0.61 | 2.56E-14 |
| NOTCH1    | 0.86  | 2.81E-16 | 0.82  | 1.83E-13 |
| RASGRP2   | 1.34  | 2.84E-16 | 1.79  | 2.89E-26 |
| ABTB2     | -1.31 | 2.91E-16 | -0.96 | 2.68E-08 |
| VCAN      | -1.67 | 2.93E-16 | -1.94 | 3.62E-20 |
| FGF19     | -8.87 | 2.94E-16 | -5.16 | 1.46E-20 |
| REXO4     | -0.55 | 3.28E-16 | -0.47 | 1.01E-11 |
| CTH       | -1.35 | 3.35E-16 | -1.16 | 5.21E-13 |
| JAK3      | -1.14 | 3.36E-16 | -1.23 | 8.02E-24 |
| QPCT      | -2.83 | 3.36E-16 | -1.99 | 1.58E-18 |
| ZC3H12C   | 0.92  | 3.46E-16 | 0.85  | 1.76E-12 |
| HIST1H3D  | -3.02 | 3.52E-16 | -2.35 | 1.27E-10 |
| FBXL5     | 0.62  | 3.54E-16 | 0.57  | 1.17E-13 |
| WASF1     | -1.41 | 3.62E-16 | -1.37 | 1.61E-15 |
| PEX13     | -0.59 | 3.68E-16 | -0.49 | 5.18E-14 |
| TPD52     | -1.26 | 3.71E-16 | -0.89 | 2.85E-22 |
| SMAD9     | 1.63  | 3.78E-16 | 2.13  | 2.87E-24 |
| CD300E    | 1.78  | 3.79E-16 | 0.96  | 9.73E-06 |
| RAPGEF2   | 0.67  | 3.92E-16 | 0.63  | 3.56E-17 |
| DUSP8     | 1.02  | 4.07E-16 | 1.22  | 3.81E-20 |
| MFAP2     | -1.64 | 4.09E-16 | -1.76 | 2.11E-21 |
| PTHLH     | -3.02 | 4.18E-16 | -1.93 | 5.17E-10 |
| GPR84     | -1.80 | 4.48E-16 | -2.00 | 1.37E-21 |
| PGLYRP3   | -6.25 | 4.52E-16 | -4.43 | 1.53E-13 |

|          |       |          |       |          |
|----------|-------|----------|-------|----------|
| MBOAT7   | -0.80 | 4.53E-16 | -0.56 | 7.71E-10 |
| RUVBL1   | -0.85 | 4.56E-16 | -0.91 | 2.87E-18 |
| GOLGA3   | -0.73 | 4.57E-16 | -0.53 | 5.03E-10 |
| GAL      | -6.41 | 4.72E-16 | -5.10 | 1.10E-19 |
| JUP      | -0.99 | 4.75E-16 | -0.70 | 1.32E-12 |
| HIST1H3H | -2.26 | 4.81E-16 | -1.60 | 1.70E-12 |
| PSME3    | -0.56 | 4.81E-16 | -0.65 | 9.26E-25 |
| HSD17B1  | -1.62 | 4.84E-16 | -0.83 | 2.97E-07 |
| CSNK2A1  | -0.65 | 5.14E-16 | -0.63 | 5.04E-16 |
| AKR1B10  | -7.45 | 5.30E-16 | -4.90 | 7.64E-15 |
| BMF      | -1.10 | 5.39E-16 | -0.84 | 5.79E-10 |
| BMS1     | -0.59 | 5.39E-16 | -0.56 | 7.15E-17 |
| TUBA1A   | 0.93  | 5.45E-16 | 0.79  | 8.87E-12 |
| ACTR3B   | -1.00 | 5.79E-16 | -0.92 | 3.74E-19 |
| SRP68    | -0.51 | 5.98E-16 | -0.54 | 4.52E-23 |
| MINA     | -0.63 | 6.11E-16 | -0.70 | 3.74E-21 |
| SSB      | -0.61 | 6.11E-16 | -0.47 | 1.73E-14 |
| ATL2     | -0.81 | 6.18E-16 | -0.56 | 3.73E-08 |
| PAX9     | -2.73 | 6.31E-16 | -1.91 | 1.78E-12 |
| KRT16    | -4.86 | 6.56E-16 | -5.82 | 6.84E-24 |
| BTN3A3   | 0.82  | 6.57E-16 | 0.81  | 1.67E-14 |
| TDRD3    | 0.65  | 6.85E-16 | 0.52  | 2.46E-08 |
| NUP88    | -0.71 | 7.01E-16 | -0.60 | 2.19E-13 |
| FOXA1    | -1.59 | 7.27E-16 | -1.18 | 4.27E-16 |
| REV3L    | 0.77  | 7.39E-16 | 0.77  | 7.60E-15 |
| NR4A1    | 1.57  | 7.42E-16 | 2.14  | 2.20E-20 |
| IGF2BP1  | -6.59 | 7.43E-16 | -3.57 | 1.61E-08 |
| FTSJ3    | -0.64 | 7.48E-16 | -0.65 | 4.91E-24 |
| GAR1     | -0.67 | 7.59E-16 | -0.71 | 1.88E-16 |
| RHCE     | -2.38 | 7.95E-16 | -2.07 | 8.96E-13 |
| CD69     | 1.32  | 8.10E-16 | 1.13  | 7.66E-08 |
| PSMB3    | -0.98 | 8.20E-16 | -0.76 | 3.07E-23 |
| CTSG     | 1.99  | 8.21E-16 | 1.90  | 3.92E-14 |
| SRMS     | -3.50 | 8.27E-16 | -1.96 | 2.85E-07 |
| SEMA3D   | 1.48  | 8.37E-16 | 1.27  | 1.15E-11 |
| IDE      | -0.81 | 8.43E-16 | -0.93 | 1.41E-29 |
| AK2      | -0.80 | 8.52E-16 | -0.53 | 2.21E-11 |
| TARBP1   | -0.90 | 9.35E-16 | -0.54 | 1.02E-07 |
| ETV5     | 1.04  | 9.90E-16 | 1.03  | 2.90E-13 |
| PIGL     | -0.97 | 1.01E-15 | -0.49 | 4.42E-04 |
| GON4L    | -0.73 | 1.02E-15 | -0.69 | 2.94E-14 |
| DGKA     | -1.01 | 1.05E-15 | -0.87 | 3.99E-11 |
| DNAJC11  | -0.53 | 1.05E-15 | -0.49 | 2.58E-17 |

|         |       |          |       |          |
|---------|-------|----------|-------|----------|
| P2RX1   | 1.27  | 1.09E-15 | 1.59  | 7.88E-19 |
| EIF2AK2 | -0.89 | 1.14E-15 | -0.92 | 4.78E-25 |
| EPHB3   | -1.53 | 1.14E-15 | -1.27 | 3.51E-18 |
| TRIM15  | -6.21 | 1.14E-15 | -4.48 | 2.04E-14 |
| CCT8    | -0.66 | 1.16E-15 | -0.70 | 7.28E-27 |
| APC     | 0.64  | 1.17E-15 | 0.51  | 4.04E-14 |
| POLR3K  | -0.82 | 1.18E-15 | -0.76 | 2.48E-15 |
| SDHA    | -0.75 | 1.21E-15 | -0.65 | 7.45E-14 |
| SLC26A1 | -1.27 | 1.21E-15 | -0.72 | 2.67E-09 |
| IGLON5  | -2.60 | 1.23E-15 | -1.93 | 4.49E-18 |
| SIGLEC1 | 1.26  | 1.27E-15 | 1.46  | 4.62E-13 |
| ACP1    | -0.61 | 1.31E-15 | -0.50 | 6.01E-12 |
| EBF1    | 1.03  | 1.32E-15 | 0.85  | 3.78E-09 |
| PPP4C   | -0.76 | 1.32E-15 | -0.70 | 1.38E-23 |
| ENOPH1  | -0.64 | 1.33E-15 | -0.66 | 2.30E-19 |
| CDKN2B  | 1.22  | 1.34E-15 | 1.36  | 1.33E-14 |
| ENAH    | -0.79 | 1.37E-15 | -0.94 | 2.72E-24 |
| PSMC5   | -0.57 | 1.39E-15 | -0.47 | 1.64E-18 |
| MEX3B   | -1.22 | 1.40E-15 | -1.00 | 1.07E-10 |
| SLC15A1 | -4.30 | 1.42E-15 | -2.87 | 2.19E-13 |
| QDPR    | 0.71  | 1.47E-15 | 0.77  | 1.27E-19 |
| SOX11   | -4.70 | 1.49E-15 | -3.69 | 1.89E-15 |
| KLK6    | -6.78 | 1.60E-15 | -4.60 | 8.38E-13 |
| MAPK13  | -0.88 | 1.66E-15 | -0.68 | 6.63E-14 |
| GNGT2   | 1.04  | 1.70E-15 | 1.08  | 9.29E-15 |
| ICMT    | -0.56 | 1.71E-15 | -0.65 | 2.44E-19 |
| CLDN6   | -5.80 | 1.75E-15 | -1.85 | 2.11E-04 |
| NAA10   | -0.92 | 1.75E-15 | -0.75 | 6.71E-25 |
| ATR     | -0.67 | 1.81E-15 | -0.69 | 1.12E-15 |
| HNRNPU  | -0.50 | 1.85E-15 | -0.50 | 2.79E-15 |
| ACHE    | -2.62 | 1.88E-15 | -0.86 | 5.04E-03 |
| AMPD2   | -0.62 | 1.94E-15 | -0.72 | 5.45E-25 |
| HOXB7   | -2.17 | 1.97E-15 | -1.64 | 3.07E-13 |
| GRIP1   | -1.89 | 2.03E-15 | -1.62 | 4.44E-14 |
| NUP37   | -0.87 | 2.04E-15 | -0.76 | 1.57E-14 |
| PIP4K2C | -0.71 | 2.05E-15 | -0.76 | 4.43E-13 |
| GRB7    | -1.37 | 2.10E-15 | -0.79 | 1.16E-12 |
| BMP2    | 1.48  | 2.11E-15 | 1.85  | 3.56E-20 |
| LOXL2   | -1.83 | 2.11E-15 | -1.90 | 2.07E-18 |
| IL13    | 2.07  | 2.24E-15 | 1.95  | 8.85E-06 |
| CRLF1   | -4.15 | 2.43E-15 | -2.35 | 8.46E-08 |
| GPS1    | -0.67 | 2.48E-15 | -0.62 | 1.54E-20 |
| GJB3    | -3.15 | 2.50E-15 | -2.41 | 4.98E-10 |

|           |       |          |       |          |
|-----------|-------|----------|-------|----------|
| BMX       | 2.26  | 2.52E-15 | 3.11  | 1.36E-37 |
| AXIN1     | -0.69 | 2.55E-15 | -0.50 | 8.02E-11 |
| PPM1J     | -1.67 | 2.57E-15 | -1.11 | 1.51E-09 |
| SMOC1     | -3.93 | 2.61E-15 | -2.04 | 3.07E-06 |
| CYP51A1   | 0.74  | 2.64E-15 | 0.81  | 1.64E-16 |
| E2F6      | -0.68 | 2.85E-15 | -0.62 | 1.29E-11 |
| EIF4G3    | -0.61 | 2.85E-15 | -0.75 | 2.10E-26 |
| EPB41L3   | 1.12  | 2.89E-15 | 0.95  | 1.93E-09 |
| TUBB      | -0.85 | 2.95E-15 | -0.90 | 7.18E-20 |
| ETV6      | -0.70 | 3.01E-15 | -0.70 | 9.92E-20 |
| SPATA5L1  | -0.69 | 3.10E-15 | -0.57 | 1.35E-09 |
| CDK5      | -0.83 | 3.23E-15 | -0.86 | 3.60E-19 |
| SCARF1    | 1.08  | 3.30E-15 | 1.44  | 9.95E-41 |
| ADCY9     | 0.98  | 3.39E-15 | 1.25  | 2.48E-23 |
| TNFAIP8L2 | 1.05  | 3.39E-15 | 1.02  | 1.51E-11 |
| KLC2      | -0.79 | 3.46E-15 | -0.68 | 1.99E-12 |
| PGM3      | -0.83 | 3.48E-15 | -0.91 | 2.26E-21 |
| AGTR1     | 1.81  | 3.51E-15 | 2.71  | 4.45E-40 |
| GAB3      | 0.94  | 3.57E-15 | 1.11  | 7.34E-16 |
| SUPV3L1   | -0.62 | 3.61E-15 | -0.51 | 2.00E-13 |
| CDK7      | -0.77 | 3.64E-15 | -0.68 | 1.06E-13 |
| TCOF1     | -0.77 | 3.66E-15 | -0.91 | 8.72E-20 |
| BTNL8     | 2.34  | 3.69E-15 | 2.96  | 1.86E-29 |
| ZNF408    | -0.61 | 3.70E-15 | -0.54 | 2.06E-12 |
| GAN       | -1.01 | 3.71E-15 | -1.09 | 3.07E-24 |
| SIGLEC9   | 1.11  | 3.71E-15 | 0.94  | 1.60E-08 |
| PSMA1     | -0.61 | 3.77E-15 | -0.61 | 1.97E-15 |
| TJP2      | 0.68  | 3.78E-15 | 0.81  | 5.83E-20 |
| IL16      | 0.95  | 3.79E-15 | 0.87  | 4.63E-11 |
| CHORDC1   | -0.85 | 3.81E-15 | -0.82 | 1.43E-16 |
| CRTAP     | 0.60  | 3.83E-15 | 0.50  | 2.93E-13 |
| LZTFL1    | 0.65  | 3.94E-15 | 0.57  | 5.35E-09 |
| CACNB4    | 1.56  | 3.95E-15 | 2.34  | 2.38E-27 |
| CCDC39    | 1.54  | 4.03E-15 | 1.65  | 1.16E-09 |
| UNC119    | -0.66 | 4.12E-15 | -0.53 | 9.40E-12 |
| TIPRL     | -0.64 | 4.13E-15 | -0.70 | 5.75E-22 |
| MORF4L2   | -0.69 | 4.16E-15 | -0.65 | 2.00E-16 |
| EEF1E1    | -0.91 | 4.20E-15 | -0.83 | 7.27E-15 |
| KIF4B     | -1.73 | 4.22E-15 | -2.13 | 7.36E-22 |
| PLA2G2F   | -5.27 | 4.35E-15 | -3.23 | 2.34E-08 |
| ALG1      | -0.69 | 4.41E-15 | -0.63 | 2.42E-14 |
| NFATC3    | 0.59  | 4.58E-15 | 0.45  | 2.29E-07 |
| IL34      | 1.28  | 4.59E-15 | 1.41  | 1.12E-15 |

|         |       |          |       |          |
|---------|-------|----------|-------|----------|
| CLEC4D  | 1.58  | 4.61E-15 | 1.02  | 8.47E-06 |
| STAU2   | -0.88 | 4.64E-15 | -0.70 | 3.34E-17 |
| NUP205  | -0.75 | 4.83E-15 | -0.84 | 9.96E-20 |
| RSL1D1  | -0.70 | 4.90E-15 | -0.62 | 1.66E-17 |
| DHX57   | -0.58 | 4.91E-15 | -0.68 | 1.74E-17 |
| SEC13   | -0.60 | 5.27E-15 | -0.61 | 5.38E-16 |
| ACTG2   | 1.41  | 5.33E-15 | 1.10  | 3.41E-07 |
| CRK     | 0.51  | 5.37E-15 | 0.36  | 4.81E-08 |
| ABCE1   | -0.65 | 5.42E-15 | -0.74 | 1.03E-19 |
| RAD51C  | -0.64 | 5.46E-15 | -0.63 | 2.74E-15 |
| MTPAP   | -0.64 | 5.50E-15 | -0.51 | 6.25E-12 |
| ITGAX   | 1.10  | 5.77E-15 | 1.03  | 8.53E-10 |
| TSPAN7  | 1.66  | 5.85E-15 | 2.73  | 1.22E-31 |
| SHARPIN | -0.86 | 5.91E-15 | -0.58 | 2.93E-10 |
| LYZ     | 1.40  | 6.12E-15 | 1.21  | 3.32E-08 |
| C1GALT1 | -1.05 | 6.20E-15 | -0.87 | 2.04E-12 |
| CCM2    | -0.84 | 6.23E-15 | -0.78 | 6.63E-14 |
| BARD1   | -1.21 | 6.50E-15 | -1.36 | 3.73E-24 |
| PTMA    | -0.60 | 6.52E-15 | -0.59 | 1.71E-15 |
| PEX11B  | -0.65 | 6.60E-15 | -0.62 | 1.78E-12 |
| TSR1    | -0.64 | 7.23E-15 | -0.65 | 7.73E-19 |
| CCDC127 | -0.75 | 7.26E-15 | -0.66 | 2.61E-12 |
| CKM     | -3.30 | 7.29E-15 | -2.45 | 9.19E-11 |
| TIAL1   | -0.50 | 7.49E-15 | -0.39 | 8.12E-10 |
| PF4     | 2.29  | 7.52E-15 | 3.13  | 1.22E-16 |
| SNX9    | -0.64 | 7.77E-15 | -0.92 | 6.76E-22 |
| RSPH1   | 1.83  | 7.95E-15 | 1.64  | 4.62E-07 |
| HPGDS   | 1.49  | 8.05E-15 | 2.03  | 5.02E-16 |
| KIF2A   | -0.80 | 8.21E-15 | -0.96 | 6.53E-20 |
| LRP1    | 0.89  | 8.24E-15 | 0.59  | 7.32E-07 |
| CD276   | -0.69 | 8.49E-15 | -0.90 | 3.43E-29 |
| KRT10   | -0.97 | 8.63E-15 | -0.72 | 6.13E-10 |
| WDR43   | -0.74 | 8.82E-15 | -0.80 | 4.70E-21 |
| NUP107  | -0.87 | 9.07E-15 | -0.79 | 6.23E-11 |
| PTS     | -0.96 | 9.14E-15 | -0.84 | 1.17E-16 |
| EFNB1   | 1.06  | 9.32E-15 | 0.96  | 2.25E-10 |
| YIPF3   | -0.59 | 9.38E-15 | -0.44 | 2.10E-10 |
| BASP1   | -1.91 | 9.40E-15 | -1.64 | 1.11E-16 |
| ENTPD5  | -0.85 | 9.41E-15 | -0.69 | 9.20E-17 |
| CD4     | 0.89  | 9.46E-15 | 0.69  | 1.95E-07 |
| TBL1XR1 | -0.62 | 9.56E-15 | -0.60 | 8.15E-18 |
| PA2G4   | -0.69 | 9.63E-15 | -0.61 | 9.73E-15 |
| CYC1    | -1.07 | 9.86E-15 | -0.85 | 4.62E-17 |



|         |       |          |       |          |
|---------|-------|----------|-------|----------|
| CTBP2   | -0.60 | 1.00E-14 | -0.55 | 2.08E-16 |
| CDC123  | -0.62 | 1.04E-14 | -0.62 | 3.49E-13 |
| NHP2    | -0.83 | 1.04E-14 | -0.82 | 1.64E-18 |
| FOXO3   | 0.69  | 1.06E-14 | 0.49  | 4.01E-10 |
| RANBP9  | -0.63 | 1.06E-14 | -0.60 | 4.05E-18 |
| DOCK2   | 1.03  | 1.07E-14 | 0.90  | 1.74E-09 |
| P2RX7   | 1.18  | 1.13E-14 | 1.01  | 2.34E-08 |
| GFER    | -0.67 | 1.14E-14 | -0.47 | 7.93E-11 |
| HSPA9   | -0.63 | 1.16E-14 | -0.73 | 2.61E-22 |
| PSMD7   | -0.62 | 1.17E-14 | -0.72 | 1.44E-27 |
| IFNGR2  | -0.76 | 1.18E-14 | -0.59 | 2.65E-13 |
| HNF1A   | -2.70 | 1.19E-14 | -0.88 | 9.56E-04 |
| UBE2Z   | -0.46 | 1.20E-14 | -0.55 | 7.63E-21 |
| HCN2    | -2.52 | 1.27E-14 | -1.82 | 2.18E-13 |
| CD44    | 0.95  | 1.29E-14 | 0.82  | 2.70E-12 |
| RFC3    | -1.07 | 1.32E-14 | -0.86 | 5.19E-13 |
| MATN3   | 1.44  | 1.33E-14 | 1.96  | 3.40E-18 |
| RSPH4A  | 1.97  | 1.34E-14 | 2.65  | 2.71E-16 |
| AKAP11  | 0.56  | 1.36E-14 | 0.50  | 1.36E-10 |
| C1QC    | 1.12  | 1.37E-14 | 1.12  | 1.13E-09 |
| PRPF4   | -0.60 | 1.37E-14 | -0.67 | 2.56E-22 |
| STK38   | -0.62 | 1.40E-14 | -0.52 | 4.42E-12 |
| ITGAV   | -0.99 | 1.44E-14 | -0.96 | 1.77E-16 |
| SUSD2   | 1.83  | 1.45E-14 | 3.44  | 9.73E-28 |
| ADRM1   | -0.70 | 1.55E-14 | -0.59 | 2.39E-15 |
| RPS2    | -0.90 | 1.56E-14 | -0.74 | 7.06E-16 |
| TPMT    | -0.71 | 1.57E-14 | -0.66 | 9.81E-16 |
| HMGCR   | 0.65  | 1.62E-14 | 0.55  | 5.38E-10 |
| NCKIPSD | -0.60 | 1.72E-14 | -0.45 | 1.07E-09 |
| RNF115  | -0.65 | 1.72E-14 | -0.61 | 1.63E-14 |
| HERC1   | 0.66  | 1.75E-14 | 0.65  | 6.77E-15 |
| CDC34   | -0.78 | 1.80E-14 | -0.57 | 1.19E-11 |
| THRA    | 0.77  | 1.80E-14 | 1.01  | 3.57E-21 |
| GBA     | -0.69 | 1.82E-14 | -0.77 | 1.15E-22 |
| RBL1    | -1.07 | 1.82E-14 | -1.06 | 2.21E-13 |
| SCN4A   | -3.70 | 1.86E-14 | -1.15 | 1.12E-03 |
| USP18   | -1.01 | 1.89E-14 | -0.81 | 2.90E-12 |
| DDX10   | -0.71 | 1.99E-14 | -0.69 | 1.62E-20 |
| FMO3    | 1.18  | 2.01E-14 | 1.12  | 6.62E-13 |
| RHOD    | -1.28 | 2.06E-14 | -1.08 | 1.40E-12 |
| SMARCC1 | -0.64 | 2.13E-14 | -0.74 | 2.18E-22 |
| ROBO2   | 1.62  | 2.14E-14 | 2.21  | 1.27E-22 |
| NOX4    | -1.58 | 2.16E-14 | -1.57 | 3.28E-10 |

|         |       |          |       |          |
|---------|-------|----------|-------|----------|
| CASP1   | 0.95  | 2.28E-14 | 0.99  | 1.12E-14 |
| SARS2   | -0.96 | 2.32E-14 | -0.70 | 6.44E-14 |
| LMAN1   | -0.70 | 2.40E-14 | -0.75 | 6.38E-18 |
| ALDH2   | 0.99  | 2.41E-14 | 1.49  | 1.35E-26 |
| HTR1D   | -2.88 | 2.42E-14 | -2.09 | 3.60E-07 |
| VIP     | 1.63  | 2.45E-14 | 2.38  | 3.50E-22 |
| ITGB4   | -1.75 | 2.47E-14 | -1.53 | 1.09E-11 |
| PRPF40A | -0.50 | 2.52E-14 | -0.51 | 2.34E-16 |
| MCHR1   | -2.07 | 2.54E-14 | -2.42 | 2.02E-17 |
| CSRNP2  | -0.65 | 2.56E-14 | -0.55 | 3.55E-11 |
| SAR1B   | -0.84 | 2.60E-14 | -0.90 | 2.69E-22 |
| LMBRD1  | 0.61  | 2.65E-14 | 0.55  | 4.60E-11 |
| PAH     | -6.07 | 2.66E-14 | -3.88 | 8.83E-09 |
| EXOSC10 | -0.47 | 2.94E-14 | -0.38 | 4.72E-12 |
| SASH3   | 0.94  | 3.03E-14 | 0.89  | 1.05E-09 |
| CCL25   | -3.47 | 3.13E-14 | -2.60 | 1.59E-10 |
| CREB3L2 | -0.78 | 3.14E-14 | -0.80 | 6.32E-16 |
| ITPKC   | 0.90  | 3.14E-14 | 0.53  | 1.30E-03 |
| NT5E    | -2.00 | 3.18E-14 | -1.64 | 2.26E-13 |
| RBM4    | -0.47 | 3.18E-14 | -0.37 | 4.46E-09 |
| BRAF    | -0.77 | 3.19E-14 | -0.63 | 6.44E-13 |
| PES1    | -0.56 | 3.24E-14 | -0.59 | 4.19E-13 |
| MMP15   | -1.22 | 3.28E-14 | -0.72 | 1.06E-06 |
| VSX1    | -3.45 | 3.28E-14 | -3.07 | 4.80E-13 |
| SEPT9   | -0.60 | 3.37E-14 | -0.66 | 1.13E-14 |
| RHOA    | 0.44  | 3.39E-14 | 0.31  | 7.04E-06 |
| RAP1A   | 0.51  | 3.44E-14 | 0.43  | 8.16E-10 |
| PRPS2   | -0.92 | 3.45E-14 | -0.97 | 4.83E-38 |
| NOC3L   | -0.63 | 3.49E-14 | -0.70 | 5.19E-21 |
| MMP14   | -1.13 | 3.53E-14 | -1.31 | 2.55E-18 |
| MYBPH   | -4.15 | 3.59E-14 | -2.47 | 3.55E-09 |
| PPIB    | -0.90 | 3.67E-14 | -0.77 | 3.73E-17 |
| MFRP    | 0.86  | 3.76E-14 | 0.64  | 3.29E-06 |
| RBP4    | 2.03  | 3.79E-14 | 3.31  | 1.27E-29 |
| CC2D2A  | 0.86  | 4.06E-14 | 0.87  | 7.86E-13 |
| TKT     | -0.96 | 4.06E-14 | -0.57 | 7.26E-07 |
| PIK3R2  | -0.69 | 4.07E-14 | -0.60 | 2.15E-14 |
| PLA2G4C | 1.03  | 4.29E-14 | 1.00  | 3.49E-12 |
| CMKLR1  | 1.06  | 4.44E-14 | 0.71  | 1.41E-04 |
| WFDC10B | -2.64 | 4.72E-14 | -0.83 | 2.96E-02 |
| CCNO    | -2.14 | 4.74E-14 | -2.17 | 1.90E-08 |
| LCT     | -4.38 | 4.79E-14 | -1.62 | 6.97E-04 |
| KARS    | -0.55 | 4.99E-14 | -0.66 | 5.95E-24 |

|         |       |          |       |          |
|---------|-------|----------|-------|----------|
| RRP12   | -0.76 | 5.09E-14 | -0.82 | 1.71E-12 |
| PDX1    | -8.41 | 5.15E-14 | -6.85 | 6.15E-34 |
| AXL     | 0.93  | 5.17E-14 | 0.91  | 8.95E-10 |
| WDR34   | -0.89 | 5.53E-14 | -0.66 | 8.69E-11 |
| WDR5    | -0.60 | 5.53E-14 | -0.49 | 1.37E-10 |
| CHRNA4  | 2.50  | 6.05E-14 | 2.95  | 3.99E-13 |
| ANAPC1  | -0.73 | 6.17E-14 | -0.79 | 7.76E-23 |
| DHCR24  | 0.85  | 6.29E-14 | 1.03  | 1.46E-17 |
| SUN2    | 0.63  | 6.32E-14 | 0.56  | 9.56E-13 |
| MAEA    | -0.54 | 6.50E-14 | -0.45 | 1.09E-12 |
| COL18A1 | -1.17 | 6.58E-14 | -1.08 | 5.87E-11 |
| XRCC5   | -0.49 | 6.58E-14 | -0.64 | 6.73E-25 |
| MAGI2   | 0.90  | 6.72E-14 | 0.79  | 3.40E-08 |
| MGAT4B  | -0.64 | 6.73E-14 | -0.49 | 3.40E-11 |
| ZMIZ1   | 0.66  | 6.74E-14 | 0.52  | 1.13E-08 |
| NOX1    | -2.86 | 6.91E-14 | -1.69 | 1.90E-05 |
| PPAN    | -0.76 | 6.96E-14 | -0.56 | 2.64E-08 |
| CDH15   | -2.39 | 6.99E-14 | -0.86 | 6.42E-03 |
| NPSR1   | -5.94 | 7.16E-14 | -4.31 | 6.13E-23 |
| PRSS16  | -0.94 | 7.16E-14 | -0.67 | 3.38E-10 |
| PSMB5   | -0.79 | 7.26E-14 | -0.78 | 2.75E-21 |
| NUDCD1  | -0.83 | 7.43E-14 | -0.84 | 2.79E-15 |
| PERP    | -1.11 | 7.44E-14 | -1.10 | 2.75E-15 |
| NUP35   | -0.71 | 7.61E-14 | -0.59 | 4.99E-13 |
| PTPN6   | 0.55  | 7.76E-14 | 0.53  | 9.56E-10 |
| SEC24C  | -0.45 | 7.76E-14 | -0.35 | 6.05E-09 |
| THY1    | -1.33 | 7.91E-14 | -1.97 | 6.47E-19 |
| FBXL7   | 0.95  | 7.95E-14 | 0.75  | 2.80E-07 |
| POLR2B  | -0.53 | 7.97E-14 | -0.51 | 6.16E-18 |
| SPAG8   | 1.51  | 8.08E-14 | 2.14  | 2.13E-15 |
| RAN     | -0.89 | 8.22E-14 | -0.82 | 8.54E-18 |
| CASZ1   | 0.85  | 8.25E-14 | 1.10  | 4.11E-15 |
| RNF4    | -0.44 | 8.26E-14 | -0.47 | 1.07E-19 |
| CASP5   | 1.51  | 8.57E-14 | 1.61  | 3.97E-13 |
| TRIM28  | -0.63 | 8.81E-14 | -0.52 | 8.48E-10 |
| NCL     | -0.57 | 8.85E-14 | -0.61 | 1.37E-16 |
| EFNB2   | 1.02  | 8.98E-14 | 0.80  | 1.31E-07 |
| KCNJ10  | -2.24 | 9.02E-14 | -1.96 | 2.17E-15 |
| PER1    | 1.08  | 9.16E-14 | 1.32  | 1.57E-20 |
| TARBP2  | -0.81 | 9.18E-14 | -0.54 | 2.62E-10 |
| VANGL1  | -0.74 | 9.46E-14 | -0.89 | 1.90E-17 |
| UBE2H   | -0.66 | 9.54E-14 | -0.71 | 3.47E-19 |
| TRPM2   | -1.38 | 9.57E-14 | -1.28 | 2.04E-12 |

|           |       |          |       |          |
|-----------|-------|----------|-------|----------|
| GNG7      | 1.02  | 9.61E-14 | 1.18  | 1.06E-14 |
| KIF26A    | 1.49  | 9.66E-14 | 1.87  | 1.37E-16 |
| TNFRSF11A | -1.47 | 9.66E-14 | -1.39 | 2.14E-17 |
| CD300LB   | 1.03  | 9.86E-14 | 0.74  | 1.42E-06 |
| C1GALT1C1 | -0.63 | 1.02E-13 | -0.59 | 2.56E-14 |
| DISP1     | 0.89  | 1.02E-13 | 1.03  | 7.50E-20 |
| SCYL1     | -0.56 | 1.03E-13 | -0.47 | 3.16E-13 |
| B2M       | 0.80  | 1.04E-13 | 0.77  | 9.00E-12 |
| DGUOK     | -0.67 | 1.04E-13 | -0.48 | 2.05E-10 |
| SLC6A3    | -4.12 | 1.05E-13 | -1.42 | 5.98E-03 |
| UBAC2     | -0.58 | 1.05E-13 | -0.54 | 8.66E-15 |
| H2AFZ     | -0.90 | 1.06E-13 | -0.79 | 5.19E-15 |
| RNF220    | -0.46 | 1.08E-13 | -0.38 | 1.58E-10 |
| TMEM231   | 1.12  | 1.15E-13 | 0.78  | 1.92E-04 |
| ZBTB7B    | -0.70 | 1.15E-13 | -0.60 | 7.78E-09 |
| ANAPC11   | -0.95 | 1.18E-13 | -0.82 | 4.55E-20 |
| SLC19A1   | 0.77  | 1.18E-13 | 0.87  | 3.68E-14 |
| POSTN     | -1.55 | 1.21E-13 | -2.01 | 1.03E-14 |
| SAP130    | -0.50 | 1.23E-13 | -0.50 | 8.59E-14 |
| PATZ1     | -0.64 | 1.24E-13 | -0.50 | 3.95E-08 |
| ULK1      | -0.73 | 1.24E-13 | -0.44 | 1.76E-05 |
| SUZ12     | -0.63 | 1.25E-13 | -0.58 | 5.55E-13 |
| F2RL1     | -1.41 | 1.28E-13 | -1.18 | 1.36E-12 |
| FGD2      | 0.98  | 1.28E-13 | 1.05  | 6.22E-14 |
| PPBP      | 2.39  | 1.28E-13 | 3.10  | 1.19E-14 |
| BCO2      | 1.34  | 1.31E-13 | 1.53  | 5.22E-11 |
| TRIM17    | -2.51 | 1.31E-13 | -0.90 | 1.32E-03 |
| PSD       | -1.35 | 1.32E-13 | -1.19 | 1.83E-10 |
| SIK2      | 0.72  | 1.33E-13 | 0.73  | 2.27E-17 |
| LAS1L     | -0.51 | 1.41E-13 | -0.53 | 6.87E-18 |
| DKK3      | 1.00  | 1.42E-13 | 0.88  | 3.65E-10 |
| HIST1H1C  | -1.58 | 1.48E-13 | -0.92 | 4.87E-06 |
| AARS      | -0.69 | 1.55E-13 | -0.68 | 5.89E-19 |
| LCN2      | -2.50 | 1.55E-13 | -1.70 | 9.86E-06 |
| INPP4B    | -1.52 | 1.60E-13 | -1.39 | 4.40E-12 |
| RHEB      | -0.79 | 1.61E-13 | -0.61 | 3.72E-12 |
| PNO1      | -0.75 | 1.67E-13 | -0.80 | 1.21E-19 |
| TET1      | -1.51 | 1.68E-13 | -1.19 | 6.90E-14 |
| UBA6      | -0.61 | 1.69E-13 | -0.63 | 1.46E-13 |
| COPB1     | -0.51 | 1.71E-13 | -0.55 | 7.68E-16 |
| GRIK2     | -2.90 | 1.71E-13 | -2.62 | 1.06E-11 |
| DDB1      | -0.44 | 1.78E-13 | -0.48 | 2.86E-14 |
| TSPAN32   | 1.30  | 1.84E-13 | 2.07  | 8.69E-32 |

|          |       |          |       |          |
|----------|-------|----------|-------|----------|
| KCNJ8    | 1.22  | 1.91E-13 | 1.26  | 7.09E-18 |
| LONP1    | -0.61 | 1.92E-13 | -0.42 | 2.62E-08 |
| STAU1    | -0.49 | 1.94E-13 | -0.54 | 1.39E-21 |
| CSNK2B   | -0.59 | 1.96E-13 | -0.51 | 1.70E-12 |
| NIT2     | -0.81 | 2.10E-13 | -0.68 | 1.44E-12 |
| SERPINB5 | -4.45 | 2.16E-13 | -3.55 | 2.07E-09 |
| SNRNP70  | -0.66 | 2.30E-13 | -0.38 | 2.19E-07 |
| BACE2    | -1.52 | 2.31E-13 | -1.25 | 2.29E-13 |
| LARP1    | -0.64 | 2.32E-13 | -0.74 | 4.67E-20 |
| CD244    | 1.18  | 2.35E-13 | 1.50  | 3.91E-16 |
| PPARGC1B | 1.16  | 2.43E-13 | 1.35  | 1.04E-19 |
| FBXO15   | 1.53  | 2.53E-13 | 1.29  | 4.41E-06 |
| VAT1     | 0.64  | 2.55E-13 | 0.58  | 2.93E-13 |
| STAT2    | -0.61 | 2.57E-13 | -0.46 | 7.90E-13 |
| PDE4B    | 0.95  | 2.71E-13 | 0.56  | 4.03E-05 |
| EVL      | 0.71  | 2.72E-13 | 0.75  | 1.01E-13 |
| OCRL     | -0.59 | 2.72E-13 | -0.58 | 1.35E-18 |
| WDR89    | -0.64 | 2.72E-13 | -0.58 | 3.43E-14 |
| PJA2     | 0.53  | 2.79E-13 | 0.36  | 3.78E-07 |
| YWHAG    | -0.63 | 2.90E-13 | -0.76 | 5.55E-17 |
| PHB      | -0.64 | 2.96E-13 | -0.61 | 8.81E-19 |
| COPS6    | -0.73 | 2.98E-13 | -0.65 | 2.81E-21 |
| THRB     | 1.15  | 2.98E-13 | 1.20  | 2.06E-11 |
| DNASE1L2 | -1.86 | 3.00E-13 | -0.77 | 9.06E-04 |
| COL1A2   | -1.48 | 3.09E-13 | -1.77 | 4.20E-14 |
| SMS      | -0.78 | 3.12E-13 | -0.93 | 1.00E-21 |
| POLR3A   | -0.69 | 3.23E-13 | -0.78 | 6.60E-20 |
| GATA5    | 1.42  | 3.27E-13 | 1.77  | 9.62E-16 |
| PLXDC2   | 0.85  | 3.27E-13 | 0.56  | 1.10E-05 |
| CLDN7    | -0.89 | 3.30E-13 | -0.54 | 2.92E-05 |
| CNGA1    | -2.45 | 3.31E-13 | -1.34 | 6.27E-07 |
| FBLIM1   | -0.82 | 3.35E-13 | -1.02 | 1.54E-14 |
| RBBP5    | -0.55 | 3.35E-13 | -0.65 | 1.93E-18 |
| SLC7A9   | -3.79 | 3.37E-13 | -0.75 | 3.61E-02 |
| UBE2V2   | -0.73 | 3.39E-13 | -0.61 | 7.79E-12 |
| AQP1     | 1.58  | 3.50E-13 | 2.26  | 1.30E-19 |
| NARFL    | -0.66 | 3.55E-13 | -0.42 | 6.02E-08 |
| PIGT     | -0.78 | 3.76E-13 | -0.75 | 1.03E-16 |
| ISG15    | -1.67 | 3.83E-13 | -0.91 | 3.60E-07 |
| HMGB2    | -0.98 | 3.88E-13 | -0.77 | 2.01E-09 |
| ERBB2    | -1.25 | 3.95E-13 | -0.63 | 2.59E-07 |
| ILF3     | -0.50 | 3.99E-13 | -0.40 | 5.38E-10 |
| SPSB1    | -0.87 | 4.19E-13 | -1.04 | 1.41E-15 |

|          |       |          |       |          |
|----------|-------|----------|-------|----------|
| FCGR1B   | 1.06  | 4.23E-13 | 1.06  | 3.05E-09 |
| NLRP3    | 1.06  | 4.24E-13 | 0.51  | 1.48E-03 |
| SPTBN5   | -1.72 | 4.24E-13 | -0.68 | 1.37E-03 |
| TAC4     | -5.05 | 4.25E-13 | -1.03 | 2.93E-02 |
| PMS1     | -0.57 | 4.26E-13 | -0.41 | 1.14E-07 |
| TRIM37   | -0.69 | 4.26E-13 | -0.72 | 3.96E-14 |
| CD46     | -0.75 | 4.32E-13 | -0.43 | 3.62E-05 |
| TFRC     | 1.06  | 4.32E-13 | 1.13  | 2.73E-14 |
| MMP10    | -3.87 | 4.34E-13 | -2.59 | 1.81E-07 |
| SLC33A1  | -0.62 | 4.34E-13 | -0.59 | 2.01E-11 |
| RBM8A    | -0.53 | 4.46E-13 | -0.53 | 4.87E-13 |
| HSF1     | -0.68 | 4.55E-13 | -0.51 | 5.02E-10 |
| FARSA    | -0.55 | 4.70E-13 | -0.51 | 4.19E-12 |
| SRC      | -0.71 | 4.72E-13 | -0.52 | 2.54E-09 |
| KLC3     | -1.78 | 4.74E-13 | -0.89 | 5.57E-04 |
| MMP9     | -1.85 | 4.84E-13 | -2.76 | 5.34E-23 |
| KIF5A    | -3.07 | 4.99E-13 | -2.36 | 2.15E-09 |
| RAD23B   | -0.51 | 5.00E-13 | -0.54 | 1.31E-15 |
| UGT8     | -2.26 | 5.00E-13 | -1.92 | 5.17E-12 |
| NDN      | 0.92  | 5.03E-13 | 1.04  | 1.95E-11 |
| HDAC8    | -0.50 | 5.10E-13 | -0.41 | 4.09E-08 |
| CD160    | 0.97  | 5.16E-13 | 1.48  | 3.35E-18 |
| PHLDB3   | -1.00 | 5.37E-13 | -0.87 | 8.48E-12 |
| MUC5B    | -3.90 | 5.44E-13 | -2.71 | 3.49E-05 |
| IL1B     | 1.26  | 5.49E-13 | 1.00  | 5.81E-06 |
| TBX6     | -1.41 | 5.49E-13 | -0.57 | 1.12E-03 |
| FAF2     | -0.49 | 5.51E-13 | -0.60 | 6.21E-24 |
| KRT19    | -1.30 | 5.62E-13 | -0.86 | 2.84E-07 |
| PPP2R5E  | -0.60 | 5.79E-13 | -0.65 | 2.37E-21 |
| PSMD2    | -0.63 | 5.95E-13 | -0.71 | 3.11E-18 |
| CNKSRI   | -0.84 | 6.01E-13 | -0.57 | 6.65E-09 |
| NT5DC2   | -0.84 | 6.03E-13 | -0.67 | 3.17E-09 |
| FOXO1    | 0.83  | 6.16E-13 | 0.60  | 1.95E-07 |
| SDHC     | -0.66 | 6.32E-13 | -0.69 | 2.60E-13 |
| KIF1A    | -5.09 | 6.40E-13 | -2.03 | 1.02E-03 |
| KBTBD8   | 0.88  | 6.54E-13 | 0.67  | 2.48E-05 |
| PDCD1LG2 | 1.14  | 6.54E-13 | 0.97  | 9.77E-07 |
| ELAVL1   | -0.35 | 6.79E-13 | -0.38 | 3.07E-12 |
| TGFA     | -1.57 | 6.95E-13 | -1.32 | 3.33E-18 |
| ITGA2    | -1.65 | 6.97E-13 | -1.48 | 3.66E-11 |
| PANX1    | -0.67 | 6.97E-13 | -0.88 | 1.32E-22 |
| SNRPB    | -0.89 | 6.97E-13 | -0.66 | 1.20E-10 |
| CBFB     | -0.47 | 7.01E-13 | -0.58 | 3.34E-19 |

|          |       |          |       |          |
|----------|-------|----------|-------|----------|
| MUC4     | -2.52 | 7.16E-13 | -1.76 | 4.67E-06 |
| UCHL3    | -0.79 | 7.16E-13 | -0.78 | 3.05E-16 |
| ATP6V1E2 | -0.96 | 7.48E-13 | -0.57 | 3.23E-07 |
| PABPN1   | -0.61 | 7.55E-13 | -0.36 | 6.21E-08 |
| LEMD2    | -0.52 | 7.59E-13 | -0.34 | 4.43E-07 |
| OAT      | -1.10 | 7.76E-13 | -0.83 | 7.85E-14 |
| PTAFR    | 1.12  | 7.78E-13 | 0.71  | 4.25E-05 |
| CCR8     | -1.54 | 8.17E-13 | -2.05 | 4.61E-22 |
| ITPA     | -0.73 | 8.18E-13 | -0.55 | 6.10E-08 |
| CUL4B    | -0.48 | 8.24E-13 | -0.53 | 1.64E-19 |
| P2RY13   | 1.08  | 8.29E-13 | 0.97  | 6.74E-08 |
| WRNIP1   | -0.55 | 8.34E-13 | -0.48 | 6.03E-11 |
| T        | -5.52 | 8.42E-13 | -5.28 | 5.82E-31 |
| THOC6    | -0.66 | 8.45E-13 | -0.43 | 5.89E-09 |
| INHBE    | -3.27 | 8.61E-13 | -1.48 | 1.28E-07 |
| HSPA4    | -0.54 | 8.74E-13 | -0.68 | 2.36E-26 |
| NOX5     | -3.23 | 8.83E-13 | -1.91 | 6.12E-12 |
| HNRNPD   | -0.48 | 8.93E-13 | -0.46 | 6.25E-14 |
| NAALADL2 | -1.38 | 8.93E-13 | -1.16 | 4.60E-09 |
| CDA      | -2.44 | 8.98E-13 | -1.63 | 1.08E-06 |
| COL6A3   | -1.24 | 8.99E-13 | -1.56 | 1.34E-18 |
| MYH16    | -3.69 | 9.10E-13 | -2.99 | 1.02E-10 |
| POLR3C   | -0.54 | 9.43E-13 | -0.61 | 6.63E-16 |
| NAP1L4   | -0.43 | 9.52E-13 | -0.32 | 2.82E-07 |
| RPS6KB1  | -0.57 | 9.78E-13 | -0.55 | 4.47E-14 |
| IMMT     | -0.43 | 9.79E-13 | -0.45 | 4.35E-15 |
| NFASC    | 1.26  | 9.98E-13 | 1.52  | 3.94E-14 |
| BRCA2    | -1.13 | 1.00E-12 | -1.09 | 1.12E-13 |
| NPAS2    | -1.39 | 1.02E-12 | -1.14 | 2.20E-09 |
| PNMA3    | -2.79 | 1.02E-12 | -1.50 | 1.24E-06 |
| CCNT2    | -0.51 | 1.04E-12 | -0.33 | 1.05E-06 |
| FIP1L1   | -0.65 | 1.06E-12 | -0.48 | 6.73E-15 |
| SH3GL2   | 2.45  | 1.07E-12 | 4.14  | 1.49E-33 |
| TMEM63A  | -0.84 | 1.07E-12 | -0.43 | 4.65E-05 |
| ST3GAL2  | 0.64  | 1.08E-12 | 0.47  | 6.13E-07 |
| MCM5     | -0.73 | 1.11E-12 | -0.78 | 1.72E-12 |
| CPB2     | 2.45  | 1.12E-12 | 6.08  | 6.03E-37 |
| RASSF1   | 0.53  | 1.13E-12 | 0.71  | 5.73E-23 |
| SH3GL1   | -0.56 | 1.14E-12 | -0.61 | 7.05E-16 |
| IVL      | -4.49 | 1.15E-12 | -2.49 | 1.40E-05 |
| PTPRN    | -4.02 | 1.15E-12 | -3.56 | 2.47E-14 |
| DAPK1    | 0.95  | 1.16E-12 | 1.30  | 1.41E-24 |
| HIST3H2A | -2.48 | 1.16E-12 | -1.24 | 1.71E-04 |

|          |       |          |       |          |
|----------|-------|----------|-------|----------|
| ILK      | 0.44  | 1.17E-12 | 0.37  | 3.05E-07 |
| TRIM9    | -2.77 | 1.25E-12 | -1.67 | 3.55E-09 |
| TNFSF4   | -1.22 | 1.27E-12 | -1.47 | 6.02E-19 |
| ALOX15   | 2.32  | 1.32E-12 | 3.25  | 9.92E-18 |
| CPAMD8   | 1.51  | 1.32E-12 | 2.61  | 1.43E-24 |
| ATG9B    | -1.89 | 1.34E-12 | -1.51 | 3.14E-09 |
| ABCF1    | -0.58 | 1.40E-12 | -0.58 | 9.82E-17 |
| FLCN     | 0.55  | 1.41E-12 | 0.82  | 1.46E-29 |
| TXNIP    | 0.87  | 1.41E-12 | 0.89  | 7.68E-14 |
| LSM2     | -0.92 | 1.43E-12 | -0.79 | 3.75E-15 |
| MTA2     | -0.45 | 1.47E-12 | -0.49 | 3.28E-14 |
| RGS5     | 0.96  | 1.47E-12 | 1.02  | 8.20E-15 |
| PPIE     | -0.61 | 1.49E-12 | -0.47 | 1.35E-12 |
| RAB3GAP2 | -0.48 | 1.49E-12 | -0.51 | 8.67E-14 |
| TOP3B    | -0.79 | 1.50E-12 | -0.34 | 1.32E-04 |
| SLC25A37 | -1.04 | 1.54E-12 | -0.63 | 1.70E-06 |
| UVRAG    | 0.47  | 1.57E-12 | 0.43  | 3.95E-10 |
| NEDD4L   | 0.89  | 1.62E-12 | 1.27  | 5.53E-22 |
| BATF     | -1.18 | 1.63E-12 | -1.00 | 2.04E-09 |
| FAF1     | -0.50 | 1.64E-12 | -0.54 | 5.51E-17 |
| SKP2     | -1.25 | 1.65E-12 | -1.09 | 2.82E-11 |
| RILP     | 0.84  | 1.69E-12 | 1.10  | 8.44E-24 |
| CTSA     | -0.74 | 1.71E-12 | -0.67 | 1.01E-14 |
| LRRC41   | -0.47 | 1.75E-12 | -0.53 | 1.41E-19 |
| DST      | 1.08  | 1.77E-12 | 1.12  | 4.76E-13 |
| PITPNM1  | -0.81 | 1.79E-12 | -0.57 | 2.73E-06 |
| ATF5     | -0.83 | 1.80E-12 | -0.89 | 3.84E-15 |
| BANF1    | -0.71 | 1.86E-12 | -0.54 | 4.42E-13 |
| C9orf72  | 0.71  | 1.87E-12 | 0.66  | 1.70E-11 |
| AGT      | -2.72 | 1.89E-12 | -1.40 | 2.68E-07 |
| C6       | 2.15  | 1.91E-12 | 3.23  | 1.55E-15 |
| DDX54    | -0.61 | 1.96E-12 | -0.44 | 1.05E-07 |
| MST1R    | -1.10 | 1.97E-12 | -0.77 | 1.02E-09 |
| EIF2B5   | -0.48 | 1.99E-12 | -0.35 | 1.14E-10 |
| THOC5    | -0.62 | 1.99E-12 | -0.48 | 2.41E-09 |
| PEX1     | -0.69 | 2.00E-12 | -0.57 | 9.67E-12 |
| ZNF513   | -0.69 | 2.01E-12 | -0.32 | 4.54E-04 |
| DCTN5    | -0.47 | 2.02E-12 | -0.56 | 2.03E-22 |
| ANAPC7   | -0.56 | 2.04E-12 | -0.41 | 4.99E-08 |
| YIPF6    | -0.69 | 2.10E-12 | -0.77 | 4.26E-21 |
| CSTF1    | -0.47 | 2.18E-12 | -0.47 | 7.44E-13 |
| NR5A2    | 1.16  | 2.18E-12 | 0.87  | 1.17E-06 |
| DYNC2H1  | 1.06  | 2.27E-12 | 1.08  | 1.40E-11 |



|           |       |          |       |          |
|-----------|-------|----------|-------|----------|
| TINAG     | -7.22 | 2.27E-12 | -2.87 | 4.45E-06 |
| CHID1     | -0.64 | 2.28E-12 | -0.56 | 3.61E-11 |
| ARL11     | 0.96  | 2.34E-12 | 0.75  | 9.58E-06 |
| DHX9      | -0.42 | 2.43E-12 | -0.49 | 2.14E-17 |
| PCSK1     | -4.87 | 2.52E-12 | -2.02 | 1.33E-08 |
| PLA2G15   | 0.57  | 2.54E-12 | 0.46  | 8.48E-07 |
| ALPK2     | -1.88 | 2.55E-12 | -3.22 | 6.19E-27 |
| TMEM209   | -0.61 | 2.57E-12 | -0.68 | 1.58E-18 |
| MPI       | -0.58 | 2.66E-12 | -0.53 | 3.79E-14 |
| POLR3D    | -0.60 | 2.67E-12 | -0.63 | 1.76E-15 |
| GPT       | -2.22 | 2.70E-12 | -0.77 | 6.37E-03 |
| SLC9A3R1  | -0.98 | 2.73E-12 | -0.88 | 4.84E-10 |
| MYCN      | -3.37 | 2.78E-12 | -1.50 | 1.70E-06 |
| TTC3      | -0.59 | 2.80E-12 | -0.49 | 5.67E-14 |
| GFRA1     | 1.64  | 2.81E-12 | 2.13  | 2.00E-16 |
| DHDDS     | -0.45 | 2.88E-12 | -0.50 | 5.25E-22 |
| PRF1      | 1.18  | 2.98E-12 | 1.39  | 1.31E-14 |
| NCBP1     | -0.52 | 3.04E-12 | -0.60 | 7.28E-18 |
| CDKN1A    | 0.82  | 3.25E-12 | 0.37  | 1.89E-02 |
| TLR7      | 1.01  | 3.29E-12 | 0.89  | 4.50E-07 |
| ABCA1     | 0.83  | 3.38E-12 | 0.56  | 3.61E-04 |
| HIST1H2AG | -2.32 | 3.42E-12 | -1.96 | 2.71E-09 |
| LGALS3BP  | -0.90 | 3.62E-12 | -0.68 | 3.16E-13 |
| CCT4      | -0.67 | 3.65E-12 | -0.76 | 2.40E-19 |
| HOXC4     | -1.87 | 3.73E-12 | -1.09 | 1.45E-06 |
| ADORA2A   | 0.73  | 3.77E-12 | 0.78  | 1.45E-11 |
| SFPQ      | -0.48 | 3.80E-12 | -0.55 | 1.30E-13 |
| SMARCAL1  | -0.39 | 3.91E-12 | -0.51 | 8.16E-22 |
| TNK1      | -0.70 | 3.95E-12 | -0.46 | 1.89E-05 |
| PSMG1     | -0.82 | 3.98E-12 | -0.71 | 5.60E-12 |
| HYDIN     | 1.66  | 3.99E-12 | 1.31  | 2.51E-04 |
| UTP20     | -0.82 | 3.99E-12 | -0.65 | 3.52E-13 |
| APOBEC1   | -6.89 | 4.01E-12 | -5.72 | 1.96E-24 |
| SMC6      | -0.60 | 4.07E-12 | -0.55 | 3.73E-11 |
| MPP1      | 0.82  | 4.15E-12 | 0.71  | 6.57E-08 |
| TINF2     | 0.43  | 4.15E-12 | 0.33  | 6.56E-08 |
| PHF14     | -0.60 | 4.20E-12 | -0.68 | 1.98E-20 |
| MAP3K4    | 0.50  | 4.24E-12 | 0.40  | 3.16E-09 |
| BIN2      | 0.86  | 4.38E-12 | 0.83  | 2.78E-08 |
| POLD1     | -0.70 | 4.39E-12 | -0.47 | 7.39E-07 |
| 5-Mar     | -0.51 | 4.45E-12 | -0.52 | 6.65E-15 |
| CNR1      | 1.42  | 4.48E-12 | 2.03  | 1.79E-14 |
| SLC30A4   | 0.76  | 4.54E-12 | 0.49  | 6.05E-05 |

|          |       |          |       |          |
|----------|-------|----------|-------|----------|
| ITGAM    | 1.05  | 4.56E-12 | 0.77  | 1.16E-04 |
| FRAS1    | 1.42  | 4.75E-12 | 2.02  | 5.94E-21 |
| PPHLN1   | -0.49 | 4.75E-12 | -0.37 | 1.45E-08 |
| CDKN1C   | 0.92  | 4.77E-12 | 1.04  | 6.08E-14 |
| MFN1     | -0.59 | 4.90E-12 | -0.57 | 3.91E-14 |
| ZNF384   | -0.51 | 5.02E-12 | -0.35 | 2.15E-08 |
| CMAS     | -0.74 | 5.08E-12 | -0.60 | 2.98E-09 |
| DOCK6    | 0.60  | 5.11E-12 | 0.65  | 1.02E-09 |
| HLA-DOA  | 1.10  | 5.12E-12 | 1.23  | 1.67E-13 |
| TWIST1   | -2.29 | 5.16E-12 | -2.31 | 3.29E-17 |
| ADAMDEC1 | -2.20 | 5.34E-12 | -2.66 | 5.53E-14 |
| SLC30A7  | -0.48 | 5.45E-12 | -0.58 | 8.56E-14 |
| PYCR2    | -0.59 | 5.48E-12 | -0.42 | 1.22E-07 |
| MRPS26   | -0.88 | 5.51E-12 | -0.54 | 1.13E-05 |
| CEACAM8  | 2.69  | 5.57E-12 | 3.42  | 6.35E-10 |
| FBL      | -0.70 | 5.67E-12 | -0.69 | 1.22E-15 |
| SDC1     | -0.94 | 5.71E-12 | -0.72 | 6.86E-09 |
| ZMYM2    | -0.58 | 5.95E-12 | -0.32 | 3.00E-04 |
| S1PR5    | 1.36  | 5.96E-12 | 1.60  | 3.75E-15 |
| LBR      | -0.64 | 6.21E-12 | -0.68 | 1.34E-14 |
| PFN2     | -1.54 | 6.29E-12 | -1.27 | 8.83E-09 |
| CRIPT    | -0.74 | 6.38E-12 | -0.66 | 1.11E-13 |
| MSN      | 0.67  | 6.54E-12 | 0.53  | 1.75E-08 |
| NFKBIZ   | 1.04  | 6.54E-12 | 1.30  | 3.25E-10 |
| SLC30A2  | -3.39 | 6.61E-12 | -1.38 | 2.13E-03 |
| WAS      | 0.80  | 6.69E-12 | 0.74  | 1.56E-08 |
| ZNF622   | -0.58 | 6.71E-12 | -0.58 | 5.62E-10 |
| PSMD1    | -0.55 | 6.80E-12 | -0.67 | 7.38E-25 |
| PSMC6    | -0.68 | 6.86E-12 | -0.58 | 3.83E-13 |
| MYD88    | 0.48  | 6.87E-12 | 0.37  | 3.42E-06 |
| NPM1     | -0.78 | 6.91E-12 | -0.79 | 2.26E-15 |
| CNOT3    | -0.51 | 6.97E-12 | -0.35 | 1.93E-05 |
| ERBB3    | -0.97 | 6.97E-12 | -0.49 | 7.92E-05 |
| WWP2     | 0.51  | 7.00E-12 | 0.46  | 4.57E-08 |
| SIRPG    | -1.50 | 7.06E-12 | -1.62 | 1.10E-17 |
| TMPO     | -0.82 | 7.09E-12 | -0.70 | 8.43E-09 |
| DHX16    | -0.50 | 7.18E-12 | -0.43 | 8.82E-12 |
| MLST8    | -0.60 | 7.28E-12 | -0.53 | 7.97E-18 |
| MBTPS2   | -0.54 | 7.32E-12 | -0.82 | 3.82E-32 |
| UBE2K    | -0.56 | 7.36E-12 | -0.50 | 5.74E-16 |
| HSPA14   | -0.64 | 7.37E-12 | -0.60 | 1.22E-10 |
| CD86     | 0.85  | 7.39E-12 | 0.65  | 2.33E-05 |
| CLEC2D   | -0.64 | 7.44E-12 | -0.56 | 1.39E-10 |

|           |       |          |       |          |
|-----------|-------|----------|-------|----------|
| HLA-DRA   | 1.03  | 7.53E-12 | 1.16  | 5.77E-12 |
| MYBL1     | -1.25 | 7.53E-12 | -1.01 | 1.77E-07 |
| HIST1H2BJ | -1.77 | 7.61E-12 | -0.89 | 3.98E-04 |
| DDX42     | -0.48 | 7.70E-12 | -0.36 | 5.23E-11 |
| CRCP      | -0.50 | 7.84E-12 | -0.44 | 5.23E-11 |
| DNAL1     | 0.56  | 7.88E-12 | 0.45  | 8.40E-06 |
| TLE4      | 0.82  | 8.06E-12 | 0.93  | 4.09E-21 |
| TRIM62    | -0.58 | 8.08E-12 | -0.56 | 2.69E-08 |
| NOC4L     | -0.63 | 8.63E-12 | -0.49 | 3.29E-09 |
| CARD6     | 0.77  | 8.64E-12 | 0.60  | 5.53E-09 |
| NRBP1     | -0.42 | 8.66E-12 | -0.53 | 2.00E-22 |
| LNX1      | -1.00 | 8.77E-12 | -0.67 | 5.31E-06 |
| XPA       | 0.44  | 8.94E-12 | 0.43  | 5.65E-10 |
| CCR1      | 0.95  | 9.03E-12 | 0.70  | 9.93E-06 |
| ARID4A    | 0.54  | 9.05E-12 | 0.58  | 1.19E-11 |
| HLA-DPA1  | 1.00  | 9.49E-12 | 1.12  | 5.74E-12 |
| UMPS      | -0.59 | 9.49E-12 | -0.61 | 1.75E-15 |
| GPRC5A    | 1.06  | 9.50E-12 | 1.56  | 1.04E-13 |
| IMPDH2    | -0.75 | 9.50E-12 | -0.63 | 1.69E-12 |
| CDX2      | -6.09 | 9.56E-12 | -4.16 | 7.23E-12 |
| NFKBIA    | 0.80  | 9.64E-12 | 0.86  | 1.27E-08 |
| UBE2F     | -0.54 | 9.65E-12 | -0.59 | 2.45E-15 |
| ZNF74     | -0.72 | 9.67E-12 | -0.47 | 1.40E-06 |
| EPHA1     | -1.10 | 9.70E-12 | -1.05 | 5.14E-12 |
| DUSP19    | 0.76  | 9.73E-12 | 0.60  | 5.55E-05 |
| PNMA5     | -5.35 | 9.81E-12 | -0.87 | 4.68E-02 |
| SKI       | 0.56  | 9.84E-12 | 0.51  | 7.60E-10 |
| GOLGA2    | -0.58 | 1.02E-11 | -0.46 | 5.98E-09 |
| ZGPAT     | -0.72 | 1.02E-11 | -0.41 | 1.79E-09 |
| PGM1      | 0.59  | 1.03E-11 | 0.43  | 5.61E-06 |
| PRR5      | -0.83 | 1.03E-11 | -0.63 | 1.73E-09 |
| HCFC2     | 0.52  | 1.04E-11 | 0.60  | 3.42E-11 |
| CLDN14    | -2.27 | 1.05E-11 | -2.34 | 3.74E-19 |
| SEC22B    | -0.52 | 1.05E-11 | -0.59 | 4.36E-17 |
| UTP15     | -0.53 | 1.05E-11 | -0.68 | 1.44E-15 |
| DFFB      | -0.64 | 1.06E-11 | -0.38 | 1.24E-04 |
| MAN1B1    | -0.53 | 1.10E-11 | -0.43 | 4.13E-10 |
| SGCE      | 0.97  | 1.14E-11 | 1.17  | 1.29E-14 |
| AJAP1     | 1.69  | 1.16E-11 | 1.92  | 3.13E-09 |
| RXRA      | 0.59  | 1.18E-11 | 0.77  | 3.36E-20 |
| CRTAM     | 1.15  | 1.22E-11 | 1.21  | 9.37E-11 |
| PDAP1     | -0.61 | 1.26E-11 | -0.59 | 1.29E-15 |
| TDO2      | -1.80 | 1.30E-11 | -2.24 | 2.60E-18 |

|           |       |          |       |          |
|-----------|-------|----------|-------|----------|
| SSSCA1    | -0.69 | 1.32E-11 | -0.64 | 5.74E-13 |
| EDN3      | 2.74  | 1.33E-11 | 4.62  | 5.87E-31 |
| OAS1      | -1.29 | 1.36E-11 | -0.76 | 1.22E-05 |
| LETM1     | -0.56 | 1.39E-11 | -0.50 | 3.50E-10 |
| FUS       | -0.48 | 1.42E-11 | -0.46 | 3.10E-12 |
| INPPL1    | -0.68 | 1.43E-11 | -0.39 | 1.10E-05 |
| PRIM1     | -1.13 | 1.44E-11 | -0.95 | 6.99E-11 |
| CD24      | -1.45 | 1.45E-11 | -1.46 | 7.64E-14 |
| ARF1      | -0.51 | 1.46E-11 | -0.45 | 7.54E-10 |
| GRB14     | -1.86 | 1.46E-11 | -0.74 | 3.01E-03 |
| HOXD3     | -2.45 | 1.47E-11 | -1.57 | 4.14E-05 |
| CLDN9     | -2.23 | 1.48E-11 | -0.95 | 2.85E-03 |
| DNAJC18   | 0.66  | 1.50E-11 | 0.55  | 4.69E-08 |
| TBL3      | -0.53 | 1.50E-11 | -0.53 | 2.02E-13 |
| AKT3      | 0.94  | 1.51E-11 | 0.85  | 1.59E-07 |
| ATP6V0D1  | 0.52  | 1.62E-11 | 0.41  | 1.36E-06 |
| ERCC2     | -0.64 | 1.62E-11 | -0.69 | 3.83E-14 |
| HSPB1     | -0.97 | 1.63E-11 | -0.62 | 4.51E-06 |
| HOXB8     | -3.70 | 1.68E-11 | -1.03 | 1.22E-02 |
| HLA-DPB1  | 1.00  | 1.72E-11 | 1.17  | 2.74E-13 |
| VTCN1     | -2.86 | 1.72E-11 | -2.14 | 3.73E-07 |
| RPF2      | -0.67 | 1.81E-11 | -0.69 | 5.98E-13 |
| APRT      | -0.82 | 1.85E-11 | -0.70 | 5.10E-14 |
| GNB5      | -0.55 | 1.89E-11 | -0.55 | 2.25E-13 |
| GORASP1   | 0.36  | 1.90E-11 | 0.41  | 3.20E-14 |
| GAPT      | 1.03  | 1.92E-11 | 0.96  | 5.86E-08 |
| ATP1A3    | -2.34 | 2.06E-11 | -1.17 | 2.05E-05 |
| MGST1     | -1.14 | 2.16E-11 | -0.67 | 2.09E-06 |
| COPG2     | -0.66 | 2.28E-11 | -0.70 | 5.13E-18 |
| HDAC2     | -0.63 | 2.28E-11 | -0.76 | 1.30E-19 |
| SLC35A1   | 0.68  | 2.28E-11 | 0.75  | 6.10E-11 |
| DNAI2     | 2.39  | 2.36E-11 | 3.64  | 6.10E-16 |
| CAMK2B    | -3.27 | 2.42E-11 | -0.94 | 1.38E-02 |
| MKS1      | -0.57 | 2.42E-11 | -0.52 | 2.67E-08 |
| FCGR1A    | 1.03  | 2.46E-11 | 1.00  | 2.30E-08 |
| RUNX1     | -0.63 | 2.55E-11 | -0.69 | 7.62E-14 |
| DLAT      | -0.51 | 2.57E-11 | -0.56 | 3.11E-12 |
| C14orf169 | -0.51 | 2.58E-11 | -0.52 | 2.43E-10 |
| WASF2     | 0.48  | 2.58E-11 | 0.38  | 1.16E-06 |
| RHBDF1    | -0.74 | 2.60E-11 | -0.36 | 4.00E-03 |
| HUS1      | -0.50 | 2.63E-11 | -0.48 | 3.45E-11 |
| ASAH1     | 0.70  | 2.67E-11 | 0.89  | 1.52E-10 |
| ASB6      | -0.47 | 2.80E-11 | -0.35 | 3.84E-08 |

|          |       |          |       |          |
|----------|-------|----------|-------|----------|
| AAAS     | -0.50 | 2.81E-11 | -0.36 | 1.06E-07 |
| AK7      | 1.35  | 2.85E-11 | 1.77  | 4.23E-12 |
| PIK3R3   | 0.81  | 2.87E-11 | 0.78  | 7.95E-07 |
| MED17    | -0.40 | 2.98E-11 | -0.47 | 2.06E-13 |
| F5       | -2.44 | 2.99E-11 | -1.53 | 1.72E-08 |
| GLIPR1L2 | 1.12  | 3.06E-11 | 1.22  | 2.23E-14 |
| LTA4H    | 0.69  | 3.06E-11 | 0.88  | 1.67E-12 |
| ALOX12B  | -2.59 | 3.12E-11 | -1.44 | 5.53E-04 |
| LRAT     | -2.24 | 3.18E-11 | -0.97 | 2.78E-04 |
| FTO      | 0.52  | 3.19E-11 | 0.25  | 5.68E-03 |
| CEP76    | -0.70 | 3.26E-11 | -0.56 | 1.80E-11 |
| LFNG     | -1.24 | 3.28E-11 | -0.61 | 1.31E-03 |
| CMA1     | 2.02  | 3.33E-11 | 1.84  | 2.21E-08 |
| TIA1     | -0.66 | 3.35E-11 | -0.30 | 2.67E-03 |
| YPEL4    | 0.97  | 3.35E-11 | 1.23  | 3.40E-18 |
| FOXP1    | 0.57  | 3.40E-11 | 0.39  | 8.04E-07 |
| CFHR3    | -1.99 | 3.41E-11 | -1.43 | 1.76E-07 |
| STMN1    | -1.14 | 3.43E-11 | -0.95 | 1.98E-09 |
| TRMT61B  | -0.54 | 3.49E-11 | -0.53 | 2.32E-12 |
| MUS81    | -0.49 | 3.52E-11 | -0.30 | 1.48E-06 |
| RNF157   | -1.58 | 3.53E-11 | -1.07 | 3.35E-06 |
| FZD9     | -2.65 | 3.56E-11 | -0.88 | 3.36E-02 |
| RET      | -3.00 | 3.56E-11 | -0.80 | 3.42E-03 |
| SIGLEC6  | 1.55  | 3.61E-11 | 1.93  | 1.10E-19 |
| CTSO     | 0.67  | 3.63E-11 | 0.61  | 1.10E-11 |
| FCRL2    | -2.00 | 3.64E-11 | -2.00 | 3.52E-11 |
| XRCC4    | -0.66 | 3.71E-11 | -0.74 | 1.14E-12 |
| MFF      | -0.70 | 3.79E-11 | -0.48 | 4.18E-12 |
| ELOVL4   | -2.09 | 3.97E-11 | -1.40 | 1.88E-07 |
| LIN9     | -0.74 | 3.97E-11 | -0.76 | 6.69E-08 |
| EIF4G1   | -0.57 | 4.20E-11 | -0.60 | 1.46E-12 |
| ETS2     | 0.81  | 4.27E-11 | 0.96  | 1.92E-16 |
| TTC7A    | 0.51  | 4.31E-11 | 0.53  | 3.12E-10 |
| SUPT5H   | -0.57 | 4.33E-11 | -0.49 | 1.76E-11 |
| CORO1B   | -0.55 | 4.35E-11 | -0.55 | 1.91E-12 |
| PLA2G1B  | 2.04  | 4.43E-11 | 4.76  | 1.27E-34 |
| HAX1     | -0.74 | 4.44E-11 | -0.68 | 3.45E-12 |
| PGK1     | -0.82 | 4.46E-11 | -0.99 | 3.38E-20 |
| SRXN1    | -1.71 | 4.46E-11 | -0.92 | 2.12E-06 |
| ARPC1A   | -0.72 | 4.50E-11 | -0.63 | 6.30E-16 |
| EFEMP2   | 0.75  | 4.55E-11 | 0.71  | 9.13E-09 |
| NPRL3    | -0.52 | 4.61E-11 | -0.39 | 8.29E-08 |
| POU2AF1  | -1.69 | 4.69E-11 | -2.18 | 2.35E-17 |

|           |       |          |       |          |
|-----------|-------|----------|-------|----------|
| CADM1     | 1.15  | 4.70E-11 | 1.66  | 2.95E-21 |
| HTATIP2   | -0.81 | 4.79E-11 | -0.63 | 1.11E-08 |
| UFD1L     | -0.60 | 4.79E-11 | -0.49 | 6.93E-11 |
| RERG      | 1.04  | 4.80E-11 | 1.19  | 1.78E-15 |
| MLEC      | -0.69 | 5.03E-11 | -0.36 | 3.43E-05 |
| CBR3      | -1.88 | 5.08E-11 | -0.73 | 2.99E-04 |
| HNRNPK    | -0.30 | 5.33E-11 | -0.35 | 7.60E-12 |
| AMPD3     | -0.71 | 5.46E-11 | -1.07 | 2.01E-22 |
| GABRA3    | -5.97 | 5.62E-11 | -2.76 | 2.62E-04 |
| PRSS1     | -6.10 | 5.62E-11 | -3.48 | 2.96E-07 |
| KDM6B     | 0.67  | 5.66E-11 | 0.65  | 4.45E-06 |
| CMBL      | -1.56 | 5.74E-11 | -0.83 | 9.64E-05 |
| VPS35     | -0.44 | 5.85E-11 | -0.54 | 1.26E-14 |
| PDE1C     | 1.59  | 5.86E-11 | 2.31  | 1.62E-24 |
| IL2RA     | -1.41 | 5.94E-11 | -1.93 | 4.35E-25 |
| HIST1H2AC | -1.26 | 6.02E-11 | -0.76 | 1.31E-05 |
| PRKD1     | 0.98  | 6.21E-11 | 0.95  | 1.78E-09 |
| HIST2H3C  | -1.85 | 6.22E-11 | -1.65 | 4.90E-05 |
| KRAS      | -0.77 | 6.41E-11 | -0.61 | 3.95E-09 |
| C4BPB     | -2.62 | 6.60E-11 | -0.98 | 2.55E-02 |
| GRAP      | 0.75  | 6.65E-11 | 0.61  | 5.31E-05 |
| ABHD12    | -0.56 | 6.71E-11 | -0.41 | 5.42E-06 |
| TAZ       | -0.63 | 6.75E-11 | -0.28 | 4.84E-04 |
| PTPRC     | 0.91  | 6.83E-11 | 0.83  | 2.59E-07 |
| STOML2    | -0.71 | 6.87E-11 | -0.69 | 2.03E-15 |
| PNN       | -0.82 | 6.96E-11 | -0.42 | 9.29E-09 |
| NFIL3     | 0.65  | 7.09E-11 | 0.55  | 2.56E-06 |
| EPHA8     | -4.16 | 7.13E-11 | -2.66 | 7.70E-07 |
| GJA1      | 1.11  | 7.26E-11 | 1.02  | 5.49E-09 |
| MLLT11    | -1.92 | 7.28E-11 | -1.22 | 6.79E-08 |
| KRI1      | -0.52 | 7.39E-11 | -0.38 | 1.54E-07 |
| SLCO1B1   | -6.39 | 7.75E-11 | -4.21 | 3.83E-20 |
| TREML1    | 1.16  | 7.75E-11 | 1.47  | 2.82E-10 |
| AKIRIN2   | 0.44  | 7.87E-11 | 0.37  | 3.56E-08 |
| E2F4      | -0.41 | 8.07E-11 | -0.45 | 2.30E-14 |
| SPINK4    | -8.38 | 8.12E-11 | -3.45 | 9.08E-09 |
| SLAMF9    | -2.01 | 8.18E-11 | -2.05 | 1.62E-12 |
| ZNHIT6    | -0.73 | 8.50E-11 | -0.68 | 1.27E-14 |
| DMGDH     | -2.12 | 8.55E-11 | -1.04 | 2.43E-03 |
| APOBEC4   | 2.14  | 8.64E-11 | 3.05  | 1.98E-12 |
| ARMC4     | 1.88  | 8.74E-11 | 1.78  | 1.16E-07 |
| MPP5      | 0.48  | 8.75E-11 | 0.46  | 2.37E-09 |
| G6PD      | -1.48 | 8.79E-11 | -0.74 | 1.51E-05 |

|          |       |          |       |          |
|----------|-------|----------|-------|----------|
| WISP3    | -3.93 | 8.79E-11 | -1.49 | 9.40E-04 |
| GIMAP2   | 0.82  | 8.85E-11 | 0.82  | 5.29E-08 |
| PLEK     | 0.89  | 8.85E-11 | 0.68  | 5.44E-05 |
| HERC4    | -0.45 | 8.90E-11 | -0.33 | 2.68E-06 |
| PRKCG    | -3.07 | 8.94E-11 | -2.00 | 8.74E-07 |
| BCL2L11  | -0.55 | 8.96E-11 | -0.70 | 3.83E-15 |
| PYGB     | -0.85 | 8.96E-11 | -0.44 | 6.00E-06 |
| LRCH2    | 1.23  | 9.13E-11 | 1.68  | 5.46E-20 |
| DDX18    | -0.43 | 9.18E-11 | -0.49 | 2.03E-12 |
| SLC30A1  | -0.71 | 9.33E-11 | -0.85 | 1.61E-15 |
| FGF7     | 0.94  | 9.42E-11 | 0.59  | 2.20E-04 |
| RP1      | 1.80  | 9.64E-11 | 2.34  | 6.98E-12 |
| FCRL4    | -2.34 | 9.75E-11 | -3.64 | 9.58E-23 |
| TXN      | -1.02 | 1.01E-10 | -0.76 | 2.18E-07 |
| DPP10    | -3.14 | 1.02E-10 | -0.90 | 4.28E-02 |
| FAT1     | -1.13 | 1.02E-10 | -1.44 | 2.73E-29 |
| TBC1D10C | 0.97  | 1.02E-10 | 1.33  | 1.39E-14 |
| PARVB    | 0.71  | 1.03E-10 | 0.50  | 2.98E-06 |
| PILRB    | -1.07 | 1.07E-10 | -0.35 | 2.66E-02 |
| ECM1     | -1.76 | 1.08E-10 | -1.05 | 3.37E-09 |
| RAB32    | 0.78  | 1.09E-10 | 0.41  | 6.71E-05 |
| ZBP1     | -1.32 | 1.09E-10 | -0.97 | 2.80E-07 |
| IGSF6    | 0.96  | 1.10E-10 | 0.76  | 3.43E-05 |
| RASD1    | -1.91 | 1.13E-10 | -0.98 | 1.52E-04 |
| TM9SF3   | -0.48 | 1.13E-10 | -0.55 | 7.68E-14 |
| DNAI1    | 2.08  | 1.16E-10 | 3.00  | 3.27E-11 |
| IFITM1   | -1.19 | 1.18E-10 | -0.50 | 1.85E-03 |
| BLZF1    | -0.47 | 1.19E-10 | -0.58 | 4.21E-11 |
| NOTCH3   | -0.91 | 1.19E-10 | -0.91 | 5.94E-13 |
| PTK2     | -0.54 | 1.19E-10 | -0.42 | 5.01E-07 |
| APOO     | -0.72 | 1.20E-10 | -0.83 | 3.12E-14 |
| CLCN7    | -0.61 | 1.22E-10 | -0.41 | 3.55E-07 |
| PLA2G4D  | -1.96 | 1.23E-10 | -1.03 | 1.98E-04 |
| ZNF335   | -0.54 | 1.28E-10 | -0.37 | 3.34E-05 |
| PRELID1  | -0.63 | 1.31E-10 | -0.67 | 5.31E-18 |
| ADNP     | -0.47 | 1.32E-10 | -0.53 | 9.32E-15 |
| MKRN1    | -0.41 | 1.32E-10 | -0.35 | 3.32E-08 |
| OAS3     | -1.02 | 1.35E-10 | -0.75 | 1.27E-07 |
| SUV39H1  | -0.73 | 1.38E-10 | -0.69 | 4.70E-13 |
| PLS1     | -0.78 | 1.40E-10 | -0.73 | 9.87E-10 |
| FBXW2    | 0.41  | 1.41E-10 | 0.45  | 1.35E-13 |
| MEOX2    | 1.14  | 1.42E-10 | 0.88  | 2.32E-06 |
| CBFA2T3  | 1.07  | 1.46E-10 | 1.32  | 2.39E-15 |

|           |       |          |       |          |
|-----------|-------|----------|-------|----------|
| LAG3      | -1.44 | 1.52E-10 | -0.86 | 4.46E-05 |
| RFT1      | -0.48 | 1.52E-10 | -0.47 | 1.79E-12 |
| HEBP2     | -0.76 | 1.55E-10 | -0.85 | 1.62E-17 |
| SH3PXD2B  | -0.89 | 1.55E-10 | -1.10 | 4.94E-14 |
| PIM2      | -0.99 | 1.58E-10 | -0.86 | 3.17E-08 |
| RNF125    | 0.75  | 1.58E-10 | 0.63  | 1.96E-07 |
| MGAM      | 1.57  | 1.61E-10 | 1.29  | 7.77E-06 |
| TAX1BP1   | -0.53 | 1.61E-10 | -0.49 | 1.29E-09 |
| PPIA      | -0.62 | 1.65E-10 | -0.52 | 1.87E-09 |
| PARG      | -0.45 | 1.66E-10 | -0.42 | 1.57E-09 |
| UBE2W     | -0.70 | 1.68E-10 | -0.61 | 2.22E-10 |
| TSPAN2    | 0.91  | 1.69E-10 | 0.79  | 5.46E-06 |
| ECD       | -0.39 | 1.71E-10 | -0.43 | 1.98E-11 |
| CGB5      | -4.82 | 1.73E-10 | -2.54 | 6.32E-05 |
| PARK7     | -0.55 | 1.73E-10 | -0.52 | 6.81E-13 |
| HOXA1     | -2.23 | 1.74E-10 | -1.16 | 1.11E-05 |
| MAGEC1    | -7.94 | 1.74E-10 | -4.80 | 8.98E-18 |
| IL17RA    | 0.51  | 1.78E-10 | 0.43  | 8.22E-07 |
| DCLRE1A   | -0.69 | 1.81E-10 | -0.65 | 1.02E-12 |
| CD59      | 0.69  | 1.84E-10 | 0.68  | 5.36E-10 |
| TEAD3     | -0.62 | 1.84E-10 | -0.37 | 7.58E-05 |
| FGF14     | 0.99  | 1.86E-10 | 1.04  | 9.89E-07 |
| PPP6C     | 0.36  | 1.95E-10 | 0.32  | 1.31E-08 |
| AMACR     | -1.01 | 1.96E-10 | -0.80 | 1.32E-12 |
| FTCD      | -3.11 | 2.00E-10 | -1.21 | 3.05E-03 |
| PRKCSH    | -0.46 | 2.02E-10 | -0.44 | 1.30E-08 |
| TSHR      | -2.45 | 2.03E-10 | -1.92 | 3.21E-09 |
| CASP8     | -0.54 | 2.08E-10 | -0.46 | 8.10E-10 |
| CCT2      | -0.86 | 2.09E-10 | -0.88 | 9.62E-12 |
| CCDC151   | 1.50  | 2.10E-10 | 1.63  | 5.63E-06 |
| ASCC2     | -0.55 | 2.15E-10 | -0.39 | 1.04E-06 |
| CBR1      | -1.84 | 2.16E-10 | -0.48 | 9.49E-03 |
| IDH1      | -0.88 | 2.17E-10 | -0.83 | 2.51E-11 |
| DDR2      | 1.03  | 2.28E-10 | 0.83  | 6.05E-06 |
| AK1       | 0.94  | 2.31E-10 | 1.56  | 3.63E-29 |
| MYLK3     | 1.42  | 2.35E-10 | 1.71  | 2.00E-08 |
| PAX7      | -6.59 | 2.39E-10 | -4.99 | 7.47E-12 |
| RBM19     | -0.51 | 2.39E-10 | -0.29 | 9.72E-05 |
| RARRES2   | 0.97  | 2.42E-10 | 0.85  | 2.05E-07 |
| TNFRSF17  | -1.72 | 2.42E-10 | -1.87 | 1.27E-10 |
| DFFA      | -0.50 | 2.44E-10 | -0.50 | 3.65E-15 |
| CEACAM3   | 1.17  | 2.46E-10 | 1.22  | 7.46E-09 |
| HIST2H2AC | -1.38 | 2.47E-10 | -0.74 | 4.56E-04 |



|           |       |          |       |          |
|-----------|-------|----------|-------|----------|
| KRT17     | -2.70 | 2.48E-10 | -1.46 | 2.67E-04 |
| DOCK3     | -1.75 | 2.54E-10 | -0.72 | 4.55E-03 |
| WNT10A    | -1.91 | 2.60E-10 | -1.30 | 2.81E-08 |
| PGF       | -1.55 | 2.66E-10 | -1.60 | 8.73E-12 |
| MC4R      | -2.60 | 2.68E-10 | -2.32 | 1.75E-10 |
| MTOR      | -0.47 | 2.72E-10 | -0.57 | 2.85E-14 |
| ELK4      | -0.63 | 2.77E-10 | -0.63 | 1.48E-13 |
| TPR       | -0.53 | 2.81E-10 | -0.47 | 1.93E-11 |
| CPNE5     | -1.28 | 2.89E-10 | -1.61 | 4.39E-19 |
| ANKRD36B  | -1.08 | 2.91E-10 | -0.71 | 1.43E-05 |
| TRIM6     | -1.26 | 2.91E-10 | -1.00 | 2.85E-07 |
| FAM47E    | 0.92  | 2.92E-10 | 1.42  | 7.58E-15 |
| SRPK2     | -0.49 | 2.92E-10 | -0.63 | 2.18E-16 |
| SENPI     | -0.52 | 2.98E-10 | -0.51 | 5.70E-09 |
| CADM3     | 1.32  | 2.99E-10 | 1.03  | 2.17E-05 |
| APOC2     | 1.34  | 3.05E-10 | 1.63  | 8.81E-12 |
| AIF1      | 0.83  | 3.08E-10 | 0.83  | 5.27E-08 |
| ASB16     | -1.07 | 3.22E-10 | -0.59 | 8.95E-05 |
| HIF1A     | -0.75 | 3.26E-10 | -0.99 | 7.96E-18 |
| RAD1      | -0.60 | 3.26E-10 | -0.41 | 2.34E-07 |
| CLPB      | -0.64 | 3.27E-10 | -0.68 | 3.32E-13 |
| UBD       | -1.86 | 3.28E-10 | -1.28 | 7.99E-08 |
| GGNBP2    | -0.32 | 3.34E-10 | -0.19 | 4.45E-04 |
| NFATC2IP  | -0.44 | 3.38E-10 | -0.25 | 4.48E-05 |
| PSMC2     | -0.55 | 3.38E-10 | -0.63 | 7.03E-20 |
| LPO       | -2.47 | 3.40E-10 | -1.74 | 7.89E-07 |
| DLEU1     | -0.90 | 3.41E-10 | -0.75 | 3.03E-08 |
| TRPV3     | -2.21 | 3.44E-10 | -1.40 | 1.63E-08 |
| TMCO6     | -0.56 | 3.46E-10 | -0.40 | 2.62E-05 |
| NF1       | -0.59 | 3.49E-10 | -0.57 | 7.11E-13 |
| TLX1      | -5.14 | 3.53E-10 | -3.28 | 4.22E-09 |
| CS        | -0.46 | 3.56E-10 | -0.39 | 4.25E-07 |
| TNFRSF10A | -0.81 | 3.64E-10 | -0.81 | 9.72E-09 |
| ACLY      | -0.54 | 3.66E-10 | -0.63 | 5.15E-17 |
| RAVER1    | -0.52 | 3.66E-10 | -0.48 | 2.05E-10 |
| NLRP11    | -4.23 | 3.72E-10 | -1.29 | 7.89E-04 |
| IKZF2     | -0.75 | 3.88E-10 | -0.71 | 4.96E-11 |
| CAND1     | -0.59 | 3.95E-10 | -0.71 | 2.43E-11 |
| SEC14L2   | -1.11 | 3.96E-10 | -0.94 | 1.23E-07 |
| ASPH      | -1.23 | 4.04E-10 | -0.79 | 3.60E-07 |
| TNC       | -1.72 | 4.12E-10 | -1.42 | 1.21E-07 |
| LTBR      | -0.69 | 4.15E-10 | -0.45 | 7.50E-06 |
| TMPRSS6   | -2.55 | 4.20E-10 | -0.75 | 4.94E-02 |

|         |       |          |       |          |
|---------|-------|----------|-------|----------|
| IGHMBP2 | -0.53 | 4.22E-10 | -0.34 | 1.13E-05 |
| PPID    | -0.46 | 4.64E-10 | -0.55 | 2.38E-13 |
| GOLT1B  | -0.78 | 4.68E-10 | -0.70 | 4.57E-12 |
| KLF15   | 1.28  | 4.68E-10 | 2.11  | 2.39E-17 |
| CD27    | -1.28 | 4.82E-10 | -1.36 | 5.47E-12 |
| MRPL28  | -0.56 | 4.91E-10 | -0.49 | 3.35E-11 |
| RASAL2  | 0.60  | 4.91E-10 | 0.46  | 1.14E-05 |
| PPP1CA  | -0.52 | 5.07E-10 | -0.48 | 3.07E-10 |
| SUMO1   | -0.48 | 5.21E-10 | -0.40 | 3.33E-09 |
| MUC2    | -6.52 | 5.37E-10 | -2.27 | 1.47E-04 |
| PDCD6IP | 0.33  | 5.43E-10 | 0.29  | 2.02E-07 |
| CHRD    | -1.71 | 5.50E-10 | -0.44 | 3.24E-02 |
| COL2A1  | -6.38 | 5.50E-10 | -1.48 | 1.61E-02 |
| NPTX2   | -2.15 | 5.51E-10 | -1.87 | 2.72E-07 |
| SUPT16H | -0.51 | 5.55E-10 | -0.56 | 1.82E-12 |
| COG5    | -0.49 | 5.56E-10 | -0.59 | 1.19E-15 |
| ADA     | -0.99 | 5.65E-10 | -0.94 | 2.43E-09 |
| F2      | -7.40 | 5.68E-10 | -2.07 | 2.52E-04 |
| DENND4C | 0.49  | 5.72E-10 | 0.60  | 2.47E-14 |
| CUZD1   | -1.92 | 5.76E-10 | -0.39 | 1.01E-02 |
| EIF5A   | -0.68 | 5.99E-10 | -0.59 | 1.54E-11 |
| RNASE10 | -2.71 | 5.99E-10 | -2.49 | 9.12E-10 |
| RNF39   | -1.47 | 6.10E-10 | -1.00 | 3.51E-05 |
| ENPP3   | -2.45 | 6.24E-10 | -1.01 | 1.57E-02 |
| ACOT1   | 0.68  | 6.27E-10 | 0.87  | 3.22E-12 |
| TWIST2  | 1.12  | 6.38E-10 | 1.32  | 3.20E-15 |
| ABI2    | 0.46  | 6.39E-10 | 0.50  | 7.10E-09 |
| ACVR1   | -0.48 | 6.61E-10 | -0.55 | 2.11E-15 |
| SEMA3A  | -1.85 | 6.64E-10 | -1.37 | 3.01E-06 |
| COPS8   | -0.46 | 6.66E-10 | -0.56 | 4.61E-16 |
| SSR2    | -0.65 | 6.67E-10 | -0.59 | 1.32E-12 |
| KLHL6   | 0.89  | 6.91E-10 | 1.02  | 6.57E-10 |
| MCAM    | 0.79  | 6.99E-10 | 0.41  | 2.07E-02 |
| CAPN1   | -0.52 | 7.03E-10 | -0.49 | 1.74E-10 |
| MYO1E   | -0.83 | 7.07E-10 | -0.99 | 6.50E-13 |
| FBXO22  | -0.55 | 7.13E-10 | -0.60 | 1.90E-11 |
| SMYD3   | -0.76 | 7.19E-10 | -0.68 | 1.82E-09 |
| RBBP8   | -0.67 | 7.24E-10 | -0.64 | 1.06E-12 |
| SLC9A3  | -2.85 | 7.24E-10 | -1.19 | 5.70E-04 |
| GPR179  | -1.42 | 7.65E-10 | -0.87 | 2.76E-05 |
| KIF3C   | -1.10 | 7.74E-10 | -1.18 | 9.91E-10 |
| DAXX    | -0.40 | 7.83E-10 | -0.36 | 3.34E-09 |
| SOD1    | -0.67 | 7.90E-10 | -0.47 | 5.44E-08 |

|                 |       |          |       |          |
|-----------------|-------|----------|-------|----------|
| ATMIN           | -0.40 | 8.02E-10 | -0.48 | 3.30E-18 |
| HOXB3           | -1.49 | 8.05E-10 | -0.72 | 3.76E-04 |
| ATOH7           | -2.28 | 8.17E-10 | -1.33 | 1.74E-03 |
| CEACAM6         | -1.61 | 8.17E-10 | -1.05 | 5.62E-04 |
| DPP9            | -0.56 | 8.28E-10 | -0.45 | 3.80E-08 |
| PRAP1           | -5.30 | 8.48E-10 | -1.68 | 1.20E-04 |
| HAVCR2          | 0.83  | 8.58E-10 | 0.65  | 5.74E-05 |
| SF3B2           | -0.38 | 8.63E-10 | -0.35 | 1.26E-09 |
| C1QBP           | -0.78 | 8.78E-10 | -0.69 | 3.48E-13 |
| RNF44           | -0.47 | 8.83E-10 | -0.43 | 1.22E-07 |
| IER3            | -1.14 | 8.92E-10 | -1.20 | 4.79E-09 |
| SIKE1           | -0.46 | 9.04E-10 | -0.43 | 1.33E-10 |
| RAB3A           | -0.87 | 9.14E-10 | -0.83 | 1.99E-06 |
| GPR39           | -1.08 | 9.21E-10 | -0.64 | 2.22E-04 |
| C5orf30         | -0.84 | 9.33E-10 | -0.56 | 2.80E-05 |
| ENO2            | -0.99 | 9.58E-10 | -0.54 | 1.22E-03 |
| HECTD3          | -0.40 | 9.67E-10 | -0.31 | 1.23E-05 |
| DNM1            | -1.16 | 9.76E-10 | -1.24 | 5.35E-10 |
| BBC3            | -0.77 | 9.79E-10 | -0.53 | 3.52E-06 |
| CDK8            | -0.67 | 9.87E-10 | -0.64 | 1.66E-17 |
| MOSPD2          | 0.51  | 9.88E-10 | 0.34  | 2.39E-05 |
| CSNK1D          | -0.37 | 9.89E-10 | -0.30 | 5.99E-06 |
| NUP93           | -0.41 | 9.92E-10 | -0.48 | 8.83E-11 |
| SRP72           | -0.50 | 1.01E-09 | -0.54 | 3.24E-15 |
| TM4SF5          | -8.01 | 1.02E-09 | -1.90 | 8.40E-04 |
| EPS15           | 0.31  | 1.03E-09 | 0.22  | 1.49E-05 |
| PLCL2           | 0.74  | 1.05E-09 | 0.63  | 5.70E-07 |
| COG1            | -0.48 | 1.06E-09 | -0.51 | 4.75E-14 |
| GALR2           | -2.26 | 1.06E-09 | -1.38 | 1.15E-05 |
| TNFRSF9         | -1.54 | 1.06E-09 | -1.64 | 2.30E-11 |
| PDS5A           | -0.43 | 1.09E-09 | -0.36 | 9.69E-11 |
| CENPJ           | -0.78 | 1.12E-09 | -0.47 | 5.61E-05 |
| DVL1            | -0.69 | 1.13E-09 | -0.41 | 4.89E-05 |
| SLC6A17         | -2.45 | 1.14E-09 | -2.66 | 1.28E-09 |
| CYSLTR2         | 0.93  | 1.16E-09 | 0.79  | 3.04E-05 |
| RIT1            | -0.67 | 1.16E-09 | -0.37 | 1.68E-04 |
| TTC8            | -0.55 | 1.16E-09 | -0.47 | 5.17E-09 |
| MCL1            | 0.51  | 1.18E-09 | 0.37  | 5.16E-05 |
| RCAN3           | -0.55 | 1.18E-09 | -0.68 | 7.73E-13 |
| SETD3           | 0.36  | 1.18E-09 | 0.46  | 5.22E-16 |
| TNFSF12-TNFSF13 | 1.03  | 1.19E-09 | 1.21  | 7.11E-08 |
| ARPC2           | 0.36  | 1.20E-09 | 0.17  | 1.62E-02 |
| FCGR2A          | 0.75  | 1.20E-09 | 0.63  | 2.48E-05 |

|          |       |          |       |          |
|----------|-------|----------|-------|----------|
| RAB10    | -0.51 | 1.20E-09 | -0.54 | 1.67E-13 |
| TARDBP   | -0.30 | 1.21E-09 | -0.29 | 2.68E-09 |
| POU6F2   | -4.05 | 1.22E-09 | -2.20 | 1.06E-03 |
| TRPC3    | 1.34  | 1.22E-09 | 1.57  | 8.83E-13 |
| IL12RB2  | -1.92 | 1.27E-09 | -1.23 | 1.51E-06 |
| SREBF2   | 0.53  | 1.27E-09 | 0.70  | 2.51E-14 |
| PPP2R5D  | -0.42 | 1.29E-09 | -0.39 | 2.03E-10 |
| SNX10    | 0.83  | 1.29E-09 | 0.76  | 7.73E-08 |
| OXA1L    | -0.45 | 1.30E-09 | -0.36 | 2.51E-07 |
| SERPINE2 | -1.22 | 1.31E-09 | -1.48 | 2.23E-11 |
| GSR      | -1.06 | 1.32E-09 | -0.70 | 3.70E-06 |
| APBB1IP  | 0.75  | 1.33E-09 | 0.67  | 4.57E-06 |
| MEIS2    | 0.73  | 1.33E-09 | 0.78  | 5.12E-08 |
| MUC16    | -2.88 | 1.34E-09 | -3.31 | 3.01E-07 |
| APC2     | -1.49 | 1.35E-09 | -0.77 | 4.35E-04 |
| C15orf41 | -0.68 | 1.36E-09 | -0.78 | 5.77E-13 |
| NUP133   | -0.41 | 1.36E-09 | -0.45 | 2.66E-09 |
| RAB38    | -1.02 | 1.36E-09 | -0.73 | 1.36E-05 |
| MSRA     | 0.66  | 1.38E-09 | 0.67  | 2.38E-08 |
| CPPED1   | 0.65  | 1.41E-09 | 0.62  | 1.14E-10 |
| FAM184A  | 1.11  | 1.41E-09 | 1.97  | 1.51E-20 |
| STYX     | -0.48 | 1.42E-09 | -0.51 | 3.10E-16 |
| TNFRSF6B | -1.90 | 1.43E-09 | -1.30 | 5.51E-08 |
| TRAF6    | 0.39  | 1.45E-09 | 0.39  | 1.57E-07 |
| DYSF     | 0.76  | 1.46E-09 | 0.50  | 2.68E-03 |
| SETD1A   | -0.49 | 1.46E-09 | -0.43 | 1.41E-06 |
| CA2      | 1.35  | 1.50E-09 | 2.40  | 9.67E-31 |
| PIP5K1A  | -0.52 | 1.53E-09 | -0.51 | 1.44E-07 |
| OPA1     | -0.52 | 1.56E-09 | -0.57 | 7.17E-15 |
| PACS1    | -0.58 | 1.56E-09 | -0.51 | 9.35E-11 |
| SIAH2    | -0.52 | 1.57E-09 | -0.47 | 2.01E-09 |
| IL17RD   | -1.31 | 1.58E-09 | -1.44 | 6.10E-12 |
| SLC39A14 | -0.87 | 1.60E-09 | -1.05 | 1.36E-13 |
| SNRPD3   | -0.47 | 1.66E-09 | -0.31 | 2.28E-05 |
| PTK7     | -0.81 | 1.67E-09 | -0.57 | 6.37E-08 |
| STAT1    | -0.83 | 1.69E-09 | -0.79 | 3.31E-10 |
| ST3GAL6  | 0.83  | 1.70E-09 | 1.07  | 2.72E-14 |
| RPGRIP1  | -1.07 | 1.71E-09 | -0.33 | 3.99E-02 |
| SUN1     | -0.52 | 1.71E-09 | -0.42 | 3.07E-07 |
| CPNE1    | -0.74 | 1.72E-09 | -0.49 | 7.60E-08 |
| OSMR     | -0.97 | 1.72E-09 | -1.00 | 1.86E-11 |
| POLR2I   | -0.75 | 1.72E-09 | -0.59 | 2.39E-10 |
| TXLNA    | -0.38 | 1.72E-09 | -0.40 | 1.12E-10 |

|          |       |          |       |          |
|----------|-------|----------|-------|----------|
| DENND1B  | -0.70 | 1.75E-09 | -0.70 | 4.85E-09 |
| SLC2A3   | 1.02  | 1.76E-09 | 1.14  | 8.76E-12 |
| ELK1     | -0.42 | 1.77E-09 | -0.57 | 8.45E-18 |
| PELP1    | -0.55 | 1.79E-09 | -0.42 | 3.18E-07 |
| KDSR     | 0.39  | 1.80E-09 | 0.33  | 7.04E-08 |
| ATP13A2  | -0.56 | 1.84E-09 | -0.61 | 1.42E-11 |
| THEM4    | -0.66 | 1.84E-09 | -0.50 | 3.15E-06 |
| ZNF282   | -0.47 | 1.84E-09 | -0.41 | 3.67E-07 |
| MAGEA3   | -8.08 | 1.85E-09 | -4.40 | 1.10E-08 |
| RAI14    | -0.80 | 1.87E-09 | -0.50 | 1.66E-05 |
| PON2     | -0.83 | 1.88E-09 | -0.58 | 1.14E-05 |
| HSPA1B   | -0.92 | 1.93E-09 | -0.61 | 9.45E-08 |
| TEX10    | -0.57 | 1.93E-09 | -0.59 | 2.08E-13 |
| TOP1     | -0.54 | 1.96E-09 | -0.64 | 7.49E-10 |
| BACE1    | 0.52  | 1.99E-09 | 0.44  | 3.23E-05 |
| HSPA6    | -1.43 | 1.99E-09 | -0.47 | 1.71E-02 |
| RASSF5   | 0.61  | 2.01E-09 | 0.54  | 7.95E-07 |
| TRPM1    | 2.23  | 2.02E-09 | 3.09  | 4.83E-21 |
| HIST1H3E | -1.71 | 2.04E-09 | -1.04 | 3.23E-04 |
| SNAI3    | 0.76  | 2.04E-09 | 0.76  | 1.76E-06 |
| PLN      | 1.09  | 2.09E-09 | 0.57  | 3.65E-02 |
| AGA      | -0.88 | 2.10E-09 | -0.65 | 1.62E-08 |
| HOXA13   | -6.27 | 2.10E-09 | -3.76 | 2.90E-12 |
| ETV7     | -1.00 | 2.11E-09 | -0.61 | 1.74E-05 |
| SUMO2    | -0.51 | 2.12E-09 | -0.49 | 2.87E-12 |
| PEX6     | -0.80 | 2.14E-09 | -0.44 | 8.12E-06 |
| ABCF3    | -0.39 | 2.18E-09 | -0.36 | 1.43E-09 |
| NCKAP1   | -0.45 | 2.19E-09 | -0.46 | 3.16E-10 |
| STEAP3   | -0.92 | 2.22E-09 | -0.93 | 3.98E-12 |
| PSPC1    | -0.44 | 2.25E-09 | -0.29 | 2.74E-04 |
| MAGEA6   | -7.84 | 2.42E-09 | -4.54 | 8.23E-10 |
| DERL2    | -0.56 | 2.43E-09 | -0.44 | 1.71E-06 |
| PVALB    | 1.44  | 2.43E-09 | 1.28  | 2.39E-05 |
| CITED2   | 0.85  | 2.47E-09 | 1.11  | 3.35E-19 |
| SLC46A2  | 1.52  | 2.47E-09 | 3.29  | 3.48E-31 |
| LEF1     | -0.91 | 2.50E-09 | -0.93 | 3.84E-11 |
| NUAK2    | -0.83 | 2.52E-09 | -0.65 | 4.04E-06 |
| C3AR1    | 0.81  | 2.61E-09 | 0.56  | 4.26E-04 |
| MAGEA12  | -7.40 | 2.66E-09 | -3.35 | 1.34E-06 |
| MAK      | 1.18  | 2.72E-09 | 1.33  | 1.22E-08 |
| ABCC9    | 0.99  | 2.74E-09 | 0.96  | 3.14E-13 |
| WWTR1    | 0.68  | 2.74E-09 | 0.68  | 1.89E-09 |
| BANK1    | 0.86  | 2.78E-09 | 0.86  | 8.34E-09 |

|          |       |          |       |          |
|----------|-------|----------|-------|----------|
| USP5     | -0.47 | 2.82E-09 | -0.45 | 8.14E-10 |
| COL4A3BP | 0.49  | 2.84E-09 | 0.46  | 1.92E-10 |
| SCIN     | -1.74 | 2.84E-09 | -0.64 | 2.68E-02 |
| FCGRT    | 0.64  | 2.91E-09 | 0.83  | 1.91E-15 |
| TALDO1   | -0.87 | 2.91E-09 | -0.60 | 1.04E-05 |
| TGDS     | -0.56 | 2.97E-09 | -0.56 | 2.65E-08 |
| HABP2    | -2.33 | 3.03E-09 | -1.03 | 2.09E-02 |
| MGAT2    | -0.52 | 3.03E-09 | -0.56 | 2.98E-17 |
| SMARCA5  | 0.40  | 3.07E-09 | 0.27  | 2.32E-06 |
| GUCY2C   | -3.05 | 3.15E-09 | -1.05 | 1.07E-04 |
| MMP7     | -1.94 | 3.15E-09 | -1.48 | 4.61E-07 |
| PSME2    | -0.67 | 3.16E-09 | -0.53 | 1.79E-10 |
| UTP18    | -0.45 | 3.17E-09 | -0.55 | 6.18E-14 |
| KLRG1    | 0.76  | 3.20E-09 | 0.73  | 5.15E-06 |
| SUGT1    | -0.49 | 3.24E-09 | -0.45 | 8.33E-09 |
| S100A4   | 1.07  | 3.26E-09 | 1.56  | 3.76E-16 |
| LAMB3    | -1.10 | 3.27E-09 | -0.89 | 6.11E-06 |
| MAP7     | -0.70 | 3.28E-09 | -0.64 | 1.64E-11 |
| TRIM65   | -0.52 | 3.31E-09 | -0.38 | 5.95E-08 |
| PI15     | -1.82 | 3.34E-09 | -1.91 | 5.90E-11 |
| EPHB1    | -1.93 | 3.42E-09 | -1.54 | 2.94E-09 |
| GTF3A    | -0.78 | 3.48E-09 | -0.54 | 2.28E-10 |
| PTK2B    | 0.59  | 3.48E-09 | 0.72  | 5.79E-13 |
| VHL      | -0.46 | 3.53E-09 | -0.50 | 2.81E-11 |
| PPP2R5A  | 0.57  | 3.58E-09 | 0.81  | 1.70E-16 |
| KRT1     | 1.78  | 3.59E-09 | 2.56  | 6.27E-31 |
| PCSK9    | 1.63  | 3.63E-09 | 3.27  | 2.53E-28 |
| SETX     | 0.38  | 3.64E-09 | 0.27  | 1.07E-05 |
| NR1I3    | -0.87 | 3.70E-09 | -0.58 | 5.01E-04 |
| ADORA2B  | -0.98 | 3.74E-09 | -0.78 | 1.22E-06 |
| CDKN2C   | -0.81 | 3.74E-09 | -0.72 | 1.25E-09 |
| KCMF1    | -0.45 | 3.77E-09 | -0.43 | 2.81E-12 |
| NCF1C    | 1.00  | 3.79E-09 | 1.04  | 6.40E-10 |
| CCBE1    | 1.57  | 3.82E-09 | 2.71  | 4.76E-26 |
| CLCN4    | 0.85  | 3.87E-09 | 0.77  | 5.90E-08 |
| IL12RB1  | 0.87  | 3.87E-09 | 1.05  | 3.65E-10 |
| COL4A3   | 1.30  | 3.97E-09 | 3.19  | 9.69E-28 |
| CLEC4A   | 0.88  | 4.07E-09 | 0.71  | 7.01E-06 |
| STRADA   | -0.38 | 4.20E-09 | -0.24 | 3.56E-05 |
| GRIN3B   | 1.65  | 4.23E-09 | 1.32  | 5.74E-03 |
| MGP      | 0.90  | 4.23E-09 | 1.17  | 1.27E-13 |
| INCA1    | 0.73  | 4.26E-09 | 1.32  | 5.13E-28 |
| RP9      | -0.55 | 4.27E-09 | -0.46 | 2.42E-06 |

|           |       |          |       |          |
|-----------|-------|----------|-------|----------|
| HIST2H2BE | -1.17 | 4.41E-09 | -0.44 | 1.37E-02 |
| MAP1LC3C  | 1.36  | 4.44E-09 | 1.84  | 4.11E-13 |
| HIST1H3G  | -2.89 | 4.48E-09 | -1.80 | 5.90E-05 |
| EZHI      | 0.45  | 4.56E-09 | 0.68  | 1.81E-19 |
| CYCS      | -0.69 | 4.61E-09 | -0.73 | 3.34E-13 |
| KCNE2     | -1.32 | 4.62E-09 | -0.95 | 2.00E-05 |
| TMEM131   | -0.42 | 4.71E-09 | -0.44 | 9.32E-10 |
| ABCC5     | -0.89 | 4.79E-09 | -0.43 | 8.08E-04 |
| ADIPOR2   | 0.51  | 4.99E-09 | 0.56  | 4.28E-10 |
| SOD3      | 0.90  | 5.13E-09 | 1.21  | 2.38E-16 |
| FGF5      | -4.30 | 5.14E-09 | -3.47 | 7.16E-10 |
| SYTL1     | -0.95 | 5.18E-09 | -0.42 | 2.37E-03 |
| PDPN      | 1.11  | 5.25E-09 | 1.22  | 6.32E-11 |
| PNKD      | -0.71 | 5.25E-09 | -0.33 | 8.86E-03 |
| MTF2      | -0.51 | 5.28E-09 | -0.36 | 5.42E-07 |
| CTBP1     | -0.42 | 5.49E-09 | -0.28 | 2.28E-05 |
| EXOSC3    | -0.53 | 5.63E-09 | -0.49 | 1.16E-08 |
| GM2A      | 0.57  | 5.63E-09 | 0.24  | 4.38E-02 |
| RPLP0     | -0.78 | 5.64E-09 | -0.60 | 3.60E-09 |
| TSC22D3   | 0.87  | 5.68E-09 | 0.95  | 6.05E-13 |
| NFKBIE    | -0.66 | 5.71E-09 | -0.63 | 1.67E-09 |
| SATB1     | 0.76  | 5.71E-09 | 0.81  | 6.94E-10 |
| PARK2     | 1.06  | 5.73E-09 | 1.27  | 5.84E-26 |
| EDNRA     | 0.80  | 5.76E-09 | 0.55  | 2.15E-04 |
| GALNT3    | -1.02 | 5.82E-09 | -0.70 | 9.61E-05 |
| ID2       | 0.77  | 5.83E-09 | 1.03  | 5.92E-12 |
| GABRD     | -1.33 | 5.84E-09 | -1.36 | 4.51E-09 |
| TRIM25    | 0.51  | 5.85E-09 | 0.74  | 1.11E-17 |
| VDR       | -0.81 | 5.92E-09 | -0.90 | 7.38E-13 |
| DHX8      | -0.35 | 5.93E-09 | -0.51 | 6.26E-15 |
| INPP1     | 0.59  | 6.00E-09 | 0.59  | 1.44E-08 |
| DSG3      | -4.81 | 6.05E-09 | -2.07 | 3.14E-03 |
| CALML5    | -6.52 | 6.14E-09 | -1.97 | 1.25E-03 |
| GGH       | -1.34 | 6.34E-09 | -1.04 | 1.61E-08 |
| NFIA      | 0.70  | 6.40E-09 | 0.92  | 7.22E-10 |
| B4GALT1   | -0.61 | 6.58E-09 | -0.60 | 1.75E-10 |
| MPHOSPH8  | 0.44  | 6.72E-09 | 0.48  | 2.01E-13 |
| FOXQ1     | -1.72 | 6.79E-09 | -0.76 | 1.81E-02 |
| SPEF2     | 0.96  | 6.82E-09 | 1.10  | 4.70E-08 |
| DEDD      | -0.34 | 6.85E-09 | -0.31 | 5.38E-05 |
| NR1D1     | -0.93 | 6.95E-09 | -0.76 | 2.04E-08 |
| TIGIT     | -1.12 | 7.03E-09 | -1.29 | 6.60E-14 |
| CDCP1     | -1.02 | 7.06E-09 | -1.15 | 2.63E-15 |

|          |       |          |       |          |
|----------|-------|----------|-------|----------|
| SCHIP1   | 0.72  | 7.10E-09 | 0.87  | 3.92E-14 |
| PDE3B    | 0.93  | 7.14E-09 | 1.27  | 5.88E-18 |
| CBS      | -1.32 | 7.29E-09 | -0.78 | 4.18E-05 |
| IL10RA   | 0.71  | 7.34E-09 | 0.57  | 6.33E-05 |
| BECN1    | -0.35 | 7.40E-09 | -0.32 | 1.18E-08 |
| SLC2A11  | -0.61 | 7.90E-09 | -0.28 | 1.97E-02 |
| TMEM39A  | -0.45 | 7.91E-09 | -0.48 | 1.15E-10 |
| SCD      | 0.80  | 7.95E-09 | 1.04  | 5.45E-12 |
| PELI3    | 0.51  | 8.10E-09 | 0.53  | 2.71E-08 |
| LILRB1   | 0.80  | 8.11E-09 | 0.72  | 6.70E-06 |
| SLC28A1  | -2.18 | 8.13E-09 | -2.00 | 2.55E-06 |
| TGM2     | 0.76  | 8.15E-09 | 0.71  | 2.15E-06 |
| PLP2     | -0.78 | 8.31E-09 | -0.78 | 1.51E-11 |
| BAZ1B    | -0.47 | 8.41E-09 | -0.57 | 5.69E-15 |
| PRNP     | 0.59  | 8.58E-09 | 0.44  | 3.81E-07 |
| TSN      | -0.48 | 8.83E-09 | -0.53 | 3.80E-10 |
| SERPINB6 | 0.50  | 8.87E-09 | 0.53  | 1.74E-08 |
| PGAM1    | -0.52 | 8.96E-09 | -0.67 | 8.57E-18 |
| SLC18A3  | -7.05 | 8.96E-09 | -2.17 | 2.84E-05 |
| CLCF1    | -1.11 | 9.02E-09 | -1.02 | 4.28E-06 |
| RAI1     | -0.65 | 9.09E-09 | -0.37 | 2.00E-04 |
| IVNS1ABP | -0.48 | 9.27E-09 | -0.43 | 1.25E-07 |
| KCNQ1OT1 | -1.00 | 9.42E-09 | -0.53 | 2.61E-05 |
| STK36    | -0.67 | 9.44E-09 | -0.36 | 1.54E-04 |
| SFN      | -1.08 | 9.56E-09 | -1.22 | 1.06E-07 |
| RNF213   | -0.70 | 9.59E-09 | -0.53 | 3.89E-06 |
| ELMO1    | 0.83  | 9.70E-09 | 1.11  | 1.51E-20 |
| ACTBL2   | -1.97 | 9.99E-09 | -1.76 | 4.91E-06 |
| OTUB1    | -0.43 | 9.99E-09 | -0.29 | 3.55E-06 |
| CYP26A1  | -2.84 | 1.01E-08 | -1.55 | 1.08E-02 |
| MPG      | -0.70 | 1.01E-08 | -0.54 | 1.12E-09 |
| COX10    | -0.44 | 1.02E-08 | -0.39 | 2.59E-08 |
| PARN     | -0.52 | 1.05E-08 | -0.38 | 1.31E-07 |
| PKD2     | 0.54  | 1.06E-08 | 0.45  | 2.28E-07 |
| PSMA6    | -0.88 | 1.07E-08 | -0.63 | 2.62E-08 |
| OGT      | -0.74 | 1.09E-08 | -0.31 | 2.66E-03 |
| GNAS     | -0.59 | 1.10E-08 | -0.43 | 3.68E-07 |
| MAMSTR   | -1.25 | 1.10E-08 | -0.55 | 7.32E-03 |
| MAP2K6   | -1.35 | 1.13E-08 | -0.69 | 9.83E-04 |
| RPS6KA1  | 0.47  | 1.15E-08 | 0.50  | 5.97E-10 |
| PIK3AP1  | 0.76  | 1.18E-08 | 0.50  | 1.14E-03 |
| KCTD1    | -0.86 | 1.21E-08 | -0.75 | 8.73E-07 |
| MDC1     | -0.59 | 1.21E-08 | -0.48 | 6.26E-08 |



|          |       |          |       |          |
|----------|-------|----------|-------|----------|
| AIMP1    | -0.37 | 1.23E-08 | -0.29 | 4.40E-06 |
| ZMPSTE24 | -0.45 | 1.25E-08 | -0.53 | 2.51E-12 |
| CCL18    | 1.23  | 1.35E-08 | 0.74  | 8.84E-03 |
| CLEC9A   | 1.28  | 1.35E-08 | 1.35  | 5.86E-08 |
| HLA-DRB1 | 0.97  | 1.36E-08 | 1.21  | 2.90E-13 |
| SGCD     | 0.92  | 1.37E-08 | 0.77  | 2.52E-05 |
| USO1     | -0.38 | 1.39E-08 | -0.38 | 2.97E-08 |
| PRKACA   | 0.29  | 1.41E-08 | 0.23  | 6.37E-05 |
| XPC      | 0.43  | 1.42E-08 | 0.45  | 8.73E-11 |
| ACVR2B   | -0.72 | 1.43E-08 | -0.47 | 1.99E-05 |
| ZNF521   | 0.83  | 1.45E-08 | 0.46  | 3.52E-03 |
| HTATSF1  | -0.43 | 1.47E-08 | -0.40 | 1.42E-11 |
| ARG2     | -0.95 | 1.50E-08 | -0.66 | 5.28E-08 |
| EDARADD  | -1.27 | 1.50E-08 | -1.03 | 3.70E-08 |
| HERC3    | 0.53  | 1.52E-08 | 0.56  | 1.85E-12 |
| RGS16    | 0.88  | 1.52E-08 | 0.88  | 9.42E-07 |
| CCL7     | -2.05 | 1.56E-08 | -2.86 | 1.91E-16 |
| DDX47    | -0.48 | 1.56E-08 | -0.39 | 2.02E-07 |
| FNTB     | -0.39 | 1.56E-08 | -0.45 | 6.42E-14 |
| HTRA2    | -0.43 | 1.56E-08 | -0.32 | 6.31E-07 |
| PRKAA2   | -1.28 | 1.56E-08 | -0.95 | 6.06E-07 |
| MAG      | 1.99  | 1.59E-08 | 3.40  | 8.39E-31 |
| PAWR     | -0.62 | 1.60E-08 | -0.49 | 1.86E-05 |
| GDF15    | -1.47 | 1.62E-08 | -0.72 | 3.50E-03 |
| POFUT1   | -0.46 | 1.62E-08 | -0.51 | 2.73E-14 |
| 9-Mar    | -0.70 | 1.66E-08 | -0.43 | 1.86E-04 |
| TRUB1    | -0.56 | 1.67E-08 | -0.67 | 3.05E-14 |
| DEAF1    | -0.60 | 1.68E-08 | -0.43 | 1.98E-06 |
| TRAF1    | -0.74 | 1.68E-08 | -0.74 | 3.25E-09 |
| CCDC47   | -0.44 | 1.70E-08 | -0.40 | 2.58E-10 |
| NUBP2    | -0.60 | 1.70E-08 | -0.44 | 2.46E-08 |
| CGA      | -8.26 | 1.71E-08 | -1.25 | 4.65E-02 |
| MAGEA8   | -5.64 | 1.71E-08 | -1.24 | 2.43E-02 |
| DMD      | 0.88  | 1.76E-08 | 1.34  | 3.25E-16 |
| NR3C1    | 0.54  | 1.78E-08 | 0.34  | 6.60E-05 |
| STX4     | -0.43 | 1.79E-08 | -0.34 | 8.18E-06 |
| KLC1     | 0.39  | 1.83E-08 | 0.42  | 8.23E-10 |
| FMO1     | -1.38 | 1.87E-08 | -1.74 | 1.31E-11 |
| MAPK6    | -0.65 | 1.88E-08 | -0.70 | 1.38E-13 |
| FKTN     | -0.44 | 1.89E-08 | -0.52 | 1.96E-11 |
| MACROD2  | 1.39  | 1.89E-08 | 2.31  | 2.10E-18 |
| EGLN2    | 0.45  | 1.92E-08 | 0.64  | 3.97E-15 |
| DOK3     | 0.65  | 2.02E-08 | 0.65  | 3.73E-06 |

|          |       |          |       |          |
|----------|-------|----------|-------|----------|
| RPIA     | -0.50 | 2.02E-08 | -0.34 | 2.94E-06 |
| SPATS2L  | -0.67 | 2.02E-08 | -0.67 | 1.35E-09 |
| DDX3X    | 0.36  | 2.05E-08 | 0.21  | 5.71E-03 |
| C5orf42  | -0.72 | 2.10E-08 | -0.58 | 8.31E-07 |
| FXR1     | -0.44 | 2.12E-08 | -0.46 | 5.38E-10 |
| PRDX3    | -0.56 | 2.14E-08 | -0.58 | 6.19E-12 |
| CYS1     | 1.31  | 2.19E-08 | 2.32  | 1.19E-28 |
| XRCC6    | -0.40 | 2.24E-08 | -0.41 | 8.16E-10 |
| PRDM6    | 0.80  | 2.26E-08 | 0.62  | 1.36E-04 |
| SERPINA5 | -2.42 | 2.26E-08 | -1.15 | 5.82E-05 |
| C1orf43  | -0.57 | 2.28E-08 | -0.51 | 2.70E-07 |
| CDC73    | -0.36 | 2.29E-08 | -0.43 | 2.37E-10 |
| KRT14    | -3.85 | 2.30E-08 | -3.12 | 7.82E-07 |
| GPR143   | -1.26 | 2.34E-08 | -0.87 | 7.41E-05 |
| PEX10    | -0.49 | 2.34E-08 | -0.36 | 5.07E-07 |
| COX5A    | -0.61 | 2.39E-08 | -0.53 | 2.53E-09 |
| TRIM22   | 0.68  | 2.40E-08 | 0.84  | 5.93E-11 |
| A2ML1    | -4.89 | 2.50E-08 | -1.68 | 1.13E-03 |
| CKLF     | -0.73 | 2.55E-08 | -0.81 | 4.22E-12 |
| TGIF1    | -0.60 | 2.56E-08 | -0.53 | 6.58E-08 |
| DEK      | -0.50 | 2.57E-08 | -0.55 | 4.47E-11 |
| FSCN2    | -1.20 | 2.64E-08 | -0.38 | 3.55E-02 |
| VAV2     | -0.57 | 2.64E-08 | -0.43 | 4.83E-05 |
| TRPA1    | -2.44 | 2.67E-08 | -1.94 | 1.73E-07 |
| GLMN     | -0.65 | 2.76E-08 | -0.61 | 1.81E-08 |
| HSD11B1  | 0.90  | 2.76E-08 | 0.86  | 7.66E-08 |
| NTRK2    | 1.65  | 2.78E-08 | 2.66  | 3.28E-22 |
| CTAGE5   | -0.68 | 2.81E-08 | -0.47 | 1.49E-05 |
| EDN2     | -1.99 | 2.81E-08 | -2.38 | 5.28E-16 |
| PSMA3    | -0.60 | 2.82E-08 | -0.46 | 9.07E-07 |
| TIMP2    | 0.65  | 2.84E-08 | 0.36  | 1.81E-03 |
| RRP9     | -0.50 | 2.90E-08 | -0.49 | 3.78E-07 |
| ATP6V1C1 | -0.42 | 2.92E-08 | -0.33 | 2.47E-06 |
| FANCM    | -0.66 | 2.92E-08 | -0.54 | 1.89E-07 |
| PEA15    | 0.40  | 2.94E-08 | 0.18  | 2.41E-02 |
| G3BP1    | -0.44 | 2.95E-08 | -0.67 | 4.85E-24 |
| NACA     | -0.50 | 2.97E-08 | -0.36 | 4.04E-06 |
| BRAP     | -0.33 | 3.01E-08 | -0.26 | 6.05E-05 |
| CHD4     | -0.42 | 3.02E-08 | -0.49 | 2.57E-10 |
| SOX9     | -1.53 | 3.02E-08 | -1.00 | 3.44E-04 |
| PRDX2    | -0.68 | 3.08E-08 | -0.58 | 6.14E-09 |
| ANGPTL4  | -1.67 | 3.10E-08 | -1.43 | 3.96E-08 |
| OASL     | 0.99  | 3.12E-08 | 1.43  | 5.12E-15 |

|          |       |          |       |          |
|----------|-------|----------|-------|----------|
| PRSS8    | -0.82 | 3.20E-08 | -0.29 | 1.66E-02 |
| SCO2     | -0.65 | 3.21E-08 | -0.30 | 1.73E-03 |
| UBE2J2   | -0.43 | 3.21E-08 | -0.34 | 2.13E-06 |
| ZNRF2    | -0.53 | 3.23E-08 | -0.56 | 7.37E-12 |
| PCCB     | -0.50 | 3.40E-08 | -0.43 | 2.46E-09 |
| ITGA5    | 0.78  | 3.41E-08 | 0.49  | 1.02E-03 |
| AKAP12   | 1.35  | 3.42E-08 | 1.30  | 1.57E-08 |
| RAPGEF3  | 0.78  | 3.43E-08 | 1.24  | 2.44E-21 |
| NR3C2    | 0.88  | 3.44E-08 | 1.33  | 6.50E-15 |
| DEF6     | -0.55 | 3.48E-08 | -0.46 | 2.55E-05 |
| CACNA1C  | 0.79  | 3.53E-08 | 0.62  | 4.77E-04 |
| SMARCA1  | -0.75 | 3.54E-08 | -0.43 | 9.10E-04 |
| HIC1     | 0.70  | 3.56E-08 | 0.56  | 1.48E-04 |
| B4GALNT3 | -1.08 | 3.57E-08 | -0.50 | 5.66E-03 |
| IRF6     | -0.64 | 3.57E-08 | -0.66 | 3.74E-08 |
| FBXO2    | -1.37 | 3.58E-08 | -0.60 | 5.10E-03 |
| MEF2B    | -1.23 | 3.64E-08 | -1.17 | 1.38E-05 |
| FBXW5    | -0.58 | 3.67E-08 | -0.41 | 5.09E-06 |
| ANAPC5   | -0.40 | 3.68E-08 | -0.30 | 4.39E-05 |
| P2RX2    | 1.66  | 3.68E-08 | 2.92  | 8.74E-22 |
| NACAP1   | -0.51 | 3.69E-08 | -0.24 | 1.81E-02 |
| LCP2     | 0.64  | 3.75E-08 | 0.51  | 2.03E-04 |
| CRNKL1   | -0.39 | 3.81E-08 | -0.43 | 4.07E-08 |
| FAM161A  | -0.71 | 3.84E-08 | -0.59 | 6.36E-05 |
| PRMT1    | -0.49 | 3.85E-08 | -0.41 | 1.34E-07 |
| ZNF76    | -0.49 | 3.87E-08 | -0.18 | 2.41E-02 |
| ARID3A   | -0.90 | 3.94E-08 | -0.47 | 1.07E-03 |
| NR1H2    | -2.33 | 3.97E-08 | -0.52 | 4.36E-02 |
| HLA-DRB5 | 1.17  | 4.02E-08 | 1.23  | 9.93E-13 |
| NCF4     | 0.68  | 4.08E-08 | 0.69  | 1.30E-06 |
| WNT9B    | 1.23  | 4.08E-08 | 0.76  | 5.46E-03 |
| FURIN    | -1.19 | 4.11E-08 | -0.48 | 4.08E-03 |
| MAPK10   | 1.06  | 4.11E-08 | 1.76  | 3.60E-18 |
| DGAT2    | -0.97 | 4.16E-08 | -0.68 | 4.21E-05 |
| ISL1     | -4.00 | 4.20E-08 | -1.40 | 3.25E-02 |
| XIAP     | -0.36 | 4.21E-08 | -0.37 | 2.48E-11 |
| TRADD    | -0.58 | 4.24E-08 | -0.43 | 2.72E-05 |
| CHD7     | -0.84 | 4.31E-08 | -0.64 | 7.78E-07 |
| PSMA2    | -0.51 | 4.31E-08 | -0.58 | 3.81E-12 |
| RBM14    | -0.31 | 4.37E-08 | -0.25 | 1.19E-05 |
| CDK2     | -0.58 | 4.40E-08 | -0.52 | 5.13E-07 |
| MET      | -1.42 | 4.40E-08 | -0.77 | 3.24E-04 |
| ODF2     | -0.48 | 4.51E-08 | -0.40 | 1.84E-06 |

|         |       |          |       |          |
|---------|-------|----------|-------|----------|
| XPNPEP1 | -0.36 | 4.59E-08 | -0.47 | 4.24E-11 |
| HSD3B7  | -0.70 | 4.62E-08 | -0.76 | 9.40E-12 |
| COL4A4  | 0.98  | 4.65E-08 | 1.99  | 2.90E-19 |
| UBE2D1  | -0.47 | 4.84E-08 | -0.50 | 4.89E-12 |
| USF1    | -0.42 | 4.84E-08 | -0.35 | 4.57E-05 |
| IGFBP2  | -1.66 | 4.85E-08 | -0.91 | 2.95E-04 |
| POLR3G  | -0.95 | 4.92E-08 | -0.71 | 6.63E-06 |
| IPO7    | -0.46 | 4.94E-08 | -0.54 | 4.29E-11 |
| RIF1    | -0.60 | 4.95E-08 | -0.73 | 4.08E-15 |
| MEP1A   | -2.08 | 5.00E-08 | -0.95 | 1.47E-03 |
| ARHGAP1 | -0.41 | 5.09E-08 | -0.45 | 3.51E-10 |
| GSK3A   | -0.38 | 5.09E-08 | -0.45 | 1.17E-09 |
| CANX    | -0.45 | 5.23E-08 | -0.56 | 1.42E-13 |
| COL9A1  | -2.46 | 5.23E-08 | -1.51 | 7.23E-04 |
| KCTD6   | -0.56 | 5.24E-08 | -0.33 | 5.69E-04 |
| LAMA2   | 0.79  | 5.26E-08 | 0.68  | 5.44E-07 |
| PLIN2   | 0.76  | 5.28E-08 | 0.73  | 3.81E-07 |
| UNC13D  | 0.84  | 5.38E-08 | 1.25  | 4.39E-17 |
| KRR1    | -0.46 | 5.67E-08 | -0.41 | 1.18E-07 |
| SRCAP   | -0.36 | 5.67E-08 | -0.30 | 1.96E-07 |
| RBM15   | -0.37 | 5.70E-08 | -0.28 | 7.29E-05 |
| 2-Mar   | 0.45  | 5.76E-08 | 0.45  | 1.13E-09 |
| HAUS6   | -0.57 | 5.83E-08 | -0.46 | 6.60E-05 |
| RNF2    | -0.48 | 5.92E-08 | -0.55 | 6.32E-10 |
| NFE2L2  | 0.41  | 6.14E-08 | 0.43  | 9.20E-10 |
| NFKBIL1 | -0.53 | 6.17E-08 | -0.30 | 5.05E-04 |
| SPPL2B  | -0.61 | 6.19E-08 | -0.31 | 4.11E-04 |
| TGFB2   | 1.01  | 6.36E-08 | 1.27  | 4.36E-08 |
| WDR19   | 0.49  | 6.38E-08 | 0.69  | 3.81E-11 |
| HSPA1A  | -0.87 | 6.40E-08 | -0.48 | 2.66E-05 |
| LHX1    | -5.92 | 6.46E-08 | -3.61 | 2.31E-09 |
| CRHR1   | -3.99 | 6.52E-08 | -2.05 | 1.63E-03 |
| GSTZ1   | -0.77 | 6.61E-08 | -0.53 | 7.82E-06 |
| PDHX    | -0.45 | 6.65E-08 | -0.31 | 1.62E-05 |
| PLA2G3  | 1.55  | 6.74E-08 | 3.42  | 1.19E-21 |
| CDAN1   | -0.48 | 6.91E-08 | -0.24 | 1.55E-02 |
| CYLD    | 0.40  | 6.93E-08 | 0.27  | 8.93E-04 |
| ACIN1   | -0.45 | 7.02E-08 | -0.27 | 1.64E-04 |
| DLL4    | 0.67  | 7.15E-08 | 0.79  | 1.32E-08 |
| COPS5   | -0.56 | 7.18E-08 | -0.33 | 6.44E-05 |
| PTP4A2  | -0.39 | 7.38E-08 | -0.51 | 4.73E-12 |
| NEU1    | -0.64 | 7.60E-08 | -0.30 | 3.48E-03 |
| SCO1    | -0.42 | 7.67E-08 | -0.46 | 2.05E-10 |

|           |       |          |       |          |
|-----------|-------|----------|-------|----------|
| HDAC3     | -0.37 | 7.69E-08 | -0.47 | 2.35E-12 |
| CEP152    | -0.72 | 7.71E-08 | -0.33 | 1.17E-02 |
| PXK       | 0.49  | 7.78E-08 | 0.31  | 2.57E-04 |
| PMCH      | -1.74 | 7.87E-08 | -1.98 | 4.99E-08 |
| OSBP      | -0.33 | 7.92E-08 | -0.33 | 5.91E-09 |
| CCDC110   | -1.04 | 8.01E-08 | -0.80 | 7.11E-06 |
| GALNT1    | -0.52 | 8.04E-08 | -0.67 | 1.12E-13 |
| UBE2R2    | -0.37 | 8.38E-08 | -0.36 | 7.24E-09 |
| RAB3D     | -0.61 | 8.49E-08 | -0.32 | 7.43E-04 |
| PRPF31    | -0.36 | 8.73E-08 | -0.24 | 2.30E-04 |
| TNFRSF1B  | 0.56  | 8.88E-08 | 0.47  | 1.55E-05 |
| CLDN11    | 1.18  | 9.12E-08 | 1.98  | 2.00E-24 |
| RHOG      | 0.36  | 9.14E-08 | 0.29  | 7.90E-05 |
| TRNT1     | -0.42 | 9.25E-08 | -0.42 | 2.19E-06 |
| MOBP      | 1.33  | 9.28E-08 | 1.32  | 1.65E-04 |
| PRG2      | -1.37 | 9.29E-08 | -0.59 | 7.54E-03 |
| RPL38     | -0.68 | 9.34E-08 | -0.52 | 3.08E-08 |
| GFI1B     | 1.82  | 9.52E-08 | 2.37  | 2.32E-19 |
| CLEC12B   | 1.24  | 9.64E-08 | 1.67  | 1.23E-07 |
| MSX2      | -1.41 | 9.67E-08 | -1.17 | 4.22E-07 |
| TAGAP     | 0.72  | 9.67E-08 | 0.51  | 5.48E-04 |
| TRAF3IP2  | 0.42  | 9.71E-08 | 0.20  | 1.49E-02 |
| PCGF2     | -0.63 | 9.78E-08 | -0.31 | 2.36E-03 |
| UBE2E2    | 0.57  | 9.78E-08 | 0.56  | 2.45E-09 |
| HNRNPA1L2 | -0.39 | 9.86E-08 | -0.37 | 6.42E-07 |
| HPSE      | -0.83 | 9.95E-08 | -0.93 | 1.86E-15 |
| IGFL1     | -4.21 | 1.01E-07 | -2.09 | 6.46E-04 |
| TUB       | 0.89  | 1.01E-07 | 0.98  | 4.26E-07 |
| CD79A     | -1.41 | 1.02E-07 | -2.11 | 1.80E-14 |
| PLAT      | -1.61 | 1.02E-07 | -0.72 | 6.41E-03 |
| SGK3      | 0.47  | 1.02E-07 | 0.49  | 5.32E-08 |
| TLK2      | -0.32 | 1.07E-07 | -0.28 | 7.99E-06 |
| HPS4      | -0.38 | 1.08E-07 | -0.18 | 6.59E-03 |
| KHSRP     | -0.38 | 1.09E-07 | -0.38 | 1.29E-06 |
| ESRRA     | -0.52 | 1.10E-07 | -0.23 | 9.93E-03 |
| IFIT2     | 0.74  | 1.11E-07 | 0.81  | 4.64E-09 |
| ELAVL4    | -1.88 | 1.12E-07 | -1.63 | 6.06E-06 |
| PLEKHA5   | -0.65 | 1.14E-07 | -0.32 | 1.59E-02 |
| PNOC      | -1.35 | 1.15E-07 | -1.99 | 1.35E-14 |
| ATP8B1    | -0.78 | 1.16E-07 | -0.52 | 1.29E-06 |
| GSC       | -2.51 | 1.17E-07 | -1.15 | 4.13E-03 |
| RNF113A   | -0.42 | 1.17E-07 | -0.38 | 3.84E-07 |
| SNAP23    | 0.32  | 1.17E-07 | 0.29  | 8.40E-06 |

|         |       |          |       |          |
|---------|-------|----------|-------|----------|
| WNT10B  | -1.22 | 1.18E-07 | -0.69 | 4.08E-03 |
| ANKLE2  | -0.43 | 1.19E-07 | -0.25 | 1.95E-03 |
| ITPR1   | 0.72  | 1.23E-07 | 0.74  | 1.11E-08 |
| PPIC    | -0.51 | 1.26E-07 | -0.69 | 2.37E-15 |
| VPS33B  | -0.37 | 1.30E-07 | -0.42 | 5.49E-10 |
| DGCR8   | -0.37 | 1.32E-07 | -0.26 | 2.06E-04 |
| NSDHL   | -0.46 | 1.32E-07 | -0.42 | 1.75E-07 |
| CLEC10A | 0.90  | 1.33E-07 | 1.04  | 1.67E-07 |
| CEP120  | 0.38  | 1.34E-07 | 0.26  | 6.40E-04 |
| LEPROT  | 0.54  | 1.34E-07 | 0.29  | 3.81E-03 |
| LILRB2  | 0.77  | 1.34E-07 | 0.69  | 2.42E-05 |
| STK4    | 0.37  | 1.34E-07 | 0.21  | 2.90E-03 |
| RNF130  | 0.41  | 1.38E-07 | 0.33  | 1.89E-06 |
| SEH1L   | -0.50 | 1.40E-07 | -0.43 | 8.33E-07 |
| TP53BP1 | -0.47 | 1.40E-07 | -0.49 | 2.16E-09 |
| PSENFEN | -0.70 | 1.41E-07 | -0.57 | 5.21E-07 |
| SLFN11  | 0.67  | 1.42E-07 | 0.89  | 3.85E-13 |
| SLAMF7  | -1.06 | 1.45E-07 | -1.23 | 1.65E-08 |
| GNB4    | 0.59  | 1.48E-07 | 0.41  | 1.07E-03 |
| AKT1S1  | -0.42 | 1.50E-07 | -0.35 | 1.14E-05 |
| IL6R    | 0.74  | 1.52E-07 | 1.08  | 7.52E-11 |
| TP53    | -0.67 | 1.53E-07 | -0.63 | 9.66E-10 |
| RPS19   | -0.72 | 1.54E-07 | -0.51 | 4.99E-06 |
| OXT     | -2.74 | 1.59E-07 | -1.42 | 1.31E-03 |
| DOK7    | 1.07  | 1.61E-07 | 2.14  | 8.87E-24 |
| PLCG2   | 0.58  | 1.63E-07 | 0.44  | 1.13E-04 |
| RNF31   | -0.36 | 1.63E-07 | -0.28 | 9.53E-06 |
| GATAD1  | -0.42 | 1.69E-07 | -0.22 | 2.23E-03 |
| HCFC1   | -0.43 | 1.69E-07 | -0.49 | 2.86E-10 |
| MAPK4   | 1.72  | 1.69E-07 | 3.88  | 5.66E-28 |
| TPTE    | -3.35 | 1.71E-07 | -1.42 | 8.40E-04 |
| PSMD5   | -0.37 | 1.74E-07 | -0.39 | 1.76E-10 |
| MRC2    | 0.66  | 1.77E-07 | 0.61  | 2.44E-05 |
| EMG1    | -0.66 | 1.80E-07 | -0.45 | 3.85E-05 |
| GCNT4   | 1.02  | 1.82E-07 | 1.36  | 5.00E-12 |
| TROVE2  | -0.35 | 1.82E-07 | -0.34 | 2.58E-07 |
| OFD1    | -0.48 | 1.86E-07 | -0.33 | 2.23E-05 |
| RAD17   | -0.34 | 1.86E-07 | -0.35 | 7.23E-07 |
| CC2D1A  | -0.42 | 1.88E-07 | -0.28 | 2.78E-04 |
| SLC26A3 | 2.41  | 1.90E-07 | 1.37  | 6.82E-03 |
| IRAK3   | 0.85  | 1.92E-07 | 0.81  | 3.09E-06 |
| ZFAT    | -0.66 | 1.93E-07 | -0.40 | 4.41E-08 |
| SLC6A12 | 0.99  | 1.95E-07 | 1.32  | 2.93E-12 |

|         |       |          |       |          |
|---------|-------|----------|-------|----------|
| DCLRE1C | -0.43 | 1.99E-07 | -0.47 | 5.12E-09 |
| NUP50   | -0.36 | 2.00E-07 | -0.39 | 8.35E-09 |
| TNPO1   | -0.38 | 2.01E-07 | -0.51 | 5.45E-15 |
| ICOS    | 0.85  | 2.03E-07 | 0.97  | 1.35E-06 |
| NDP     | -2.53 | 2.05E-07 | -1.56 | 4.46E-05 |
| FBXO6   | -0.66 | 2.06E-07 | -0.45 | 4.51E-05 |
| SAA1    | -2.15 | 2.09E-07 | -1.57 | 3.64E-05 |
| GABPB1  | -0.35 | 2.14E-07 | -0.38 | 1.83E-06 |
| XPNPEP3 | -0.50 | 2.15E-07 | -0.47 | 1.97E-08 |
| MMP25   | 0.79  | 2.16E-07 | 0.64  | 3.20E-04 |
| RARA    | 0.47  | 2.16E-07 | 0.60  | 9.69E-09 |
| PTPN2   | -0.37 | 2.17E-07 | -0.27 | 5.93E-04 |
| PSAP    | 0.41  | 2.18E-07 | 0.24  | 4.18E-03 |
| AGRN    | -0.71 | 2.24E-07 | -0.49 | 1.36E-04 |
| BTD     | 0.47  | 2.24E-07 | 0.41  | 4.27E-05 |
| PEPD    | 0.45  | 2.24E-07 | 0.39  | 3.81E-07 |
| PTCH1   | 0.71  | 2.24E-07 | 0.93  | 7.05E-11 |
| TMC6    | -0.58 | 2.24E-07 | -0.33 | 3.41E-03 |
| 1-Mar   | 0.67  | 2.30E-07 | 0.34  | 4.40E-02 |
| ZNRF1   | -0.46 | 2.30E-07 | -0.41 | 1.08E-07 |
| GBX2    | -3.06 | 2.35E-07 | -1.79 | 5.77E-04 |
| CLGN    | -1.87 | 2.36E-07 | -0.91 | 1.33E-02 |
| CYP26B1 | 0.98  | 2.38E-07 | 0.85  | 3.33E-04 |
| EIF4A1  | -0.44 | 2.60E-07 | -0.43 | 1.29E-06 |
| IL1R1   | 0.60  | 2.66E-07 | 0.64  | 1.48E-06 |
| ERCC8   | -0.46 | 2.69E-07 | -0.56 | 8.36E-10 |
| PATL1   | -0.42 | 2.73E-07 | -0.44 | 1.52E-09 |
| ZNF565  | -0.50 | 2.76E-07 | -0.34 | 4.75E-04 |
| NCSTN   | -0.40 | 2.82E-07 | -0.46 | 2.07E-10 |
| NCOA1   | 0.44  | 2.83E-07 | 0.48  | 1.25E-07 |
| GJB4    | -2.54 | 2.85E-07 | -1.52 | 1.00E-03 |
| CBFA2T2 | -0.51 | 2.92E-07 | -0.27 | 4.84E-03 |
| ASCC1   | -0.42 | 2.98E-07 | -0.41 | 9.25E-09 |
| SOX13   | 0.65  | 3.01E-07 | 0.87  | 9.08E-11 |
| ITCH    | -0.34 | 3.03E-07 | -0.40 | 3.42E-13 |
| IL18RAP | 0.93  | 3.04E-07 | 1.37  | 3.62E-12 |
| RC3H1   | 0.34  | 3.05E-07 | 0.49  | 2.49E-13 |
| SLCO4C1 | 1.15  | 3.05E-07 | 2.22  | 1.94E-20 |
| TIAM1   | 0.73  | 3.09E-07 | 0.40  | 2.78E-02 |
| ACTR3   | -0.40 | 3.10E-07 | -0.59 | 2.87E-15 |
| RAP2B   | -0.52 | 3.14E-07 | -0.69 | 1.15E-14 |
| ACTG1   | -0.42 | 3.16E-07 | -0.53 | 2.37E-12 |
| IKZF1   | 0.69  | 3.16E-07 | 0.60  | 1.68E-05 |

|          |       |          |       |          |
|----------|-------|----------|-------|----------|
| KPNA3    | 0.39  | 3.16E-07 | 0.31  | 1.97E-06 |
| OBSL1    | -0.94 | 3.28E-07 | -0.40 | 2.09E-03 |
| IFRD2    | -0.45 | 3.29E-07 | -0.40 | 1.34E-05 |
| ZNF638   | -0.37 | 3.33E-07 | -0.31 | 4.01E-06 |
| DSCR3    | 0.31  | 3.34E-07 | 0.24  | 3.39E-05 |
| KIR3DL1  | 1.61  | 3.37E-07 | 2.36  | 6.07E-13 |
| RPS7     | -0.78 | 3.43E-07 | -0.50 | 1.26E-06 |
| PTPRF    | -0.51 | 3.47E-07 | -0.54 | 3.08E-09 |
| PPARD    | -0.48 | 3.48E-07 | -0.47 | 3.93E-06 |
| LRBA     | -0.49 | 3.50E-07 | -0.47 | 5.86E-10 |
| RBM38    | -0.68 | 3.51E-07 | -0.44 | 3.64E-04 |
| SESTD1   | 0.55  | 3.51E-07 | 0.68  | 1.94E-11 |
| ADSL     | -0.53 | 3.54E-07 | -0.56 | 2.30E-11 |
| RGS10    | -0.73 | 3.59E-07 | -0.77 | 1.14E-11 |
| AHSG     | -3.63 | 3.62E-07 | -2.35 | 7.14E-05 |
| SLPI     | 1.29  | 3.66E-07 | 2.20  | 2.39E-12 |
| ZNF746   | -0.37 | 3.86E-07 | -0.37 | 1.94E-08 |
| JAK1     | 0.35  | 3.87E-07 | 0.19  | 8.47E-03 |
| EGFL7    | 0.78  | 3.89E-07 | 1.36  | 3.08E-15 |
| PRDM10   | -0.37 | 3.93E-07 | -0.28 | 2.69E-05 |
| SIRT6    | -0.45 | 3.94E-07 | -0.35 | 8.97E-06 |
| S100A11  | -0.60 | 3.98E-07 | -0.57 | 4.21E-08 |
| CALCOCO2 | 0.32  | 3.99E-07 | 0.35  | 1.47E-08 |
| PANK1    | -0.74 | 4.00E-07 | -0.51 | 1.19E-04 |
| BSCL2    | -0.50 | 4.06E-07 | -0.31 | 3.00E-03 |
| HNRNPA1  | -0.39 | 4.07E-07 | -0.33 | 2.60E-05 |
| SEC23A   | -0.63 | 4.14E-07 | -0.67 | 2.22E-13 |
| CRY1     | 0.45  | 4.17E-07 | 0.55  | 1.00E-07 |
| PSMC1    | -0.51 | 4.21E-07 | -0.39 | 3.06E-07 |
| TBXAS1   | 0.66  | 4.21E-07 | 0.68  | 6.48E-10 |
| LTBP2    | 0.73  | 4.29E-07 | 0.54  | 4.71E-04 |
| MSX1     | 0.91  | 4.30E-07 | 1.29  | 4.94E-12 |
| SPG7     | -0.44 | 4.32E-07 | -0.24 | 9.22E-04 |
| ZNF175   | 0.50  | 4.36E-07 | 0.52  | 4.79E-07 |
| ATP6V0E2 | -0.67 | 4.46E-07 | -0.45 | 3.39E-05 |
| NOS1     | 2.08  | 4.48E-07 | 4.21  | 1.63E-23 |
| RPL39    | -0.87 | 4.52E-07 | -0.63 | 6.52E-09 |
| PCSK5    | 0.87  | 4.55E-07 | 0.83  | 1.84E-08 |
| MCAT     | -0.45 | 4.56E-07 | -0.31 | 2.87E-04 |
| CD82     | 0.64  | 4.62E-07 | 0.49  | 2.22E-05 |
| DEPDC5   | -0.39 | 4.67E-07 | -0.40 | 3.64E-05 |
| ACAN     | -1.39 | 4.72E-07 | -1.79 | 1.42E-09 |
| LITAF    | 0.40  | 4.76E-07 | 0.22  | 2.84E-03 |



|          |       |          |       |          |
|----------|-------|----------|-------|----------|
| GHRL     | 0.99  | 4.77E-07 | 0.98  | 1.30E-04 |
| FZR1     | -0.36 | 4.79E-07 | -0.35 | 3.77E-07 |
| UBE3C    | -0.36 | 4.85E-07 | -0.46 | 1.79E-11 |
| UQCRCQ   | -0.72 | 4.94E-07 | -0.66 | 1.23E-10 |
| DHX33    | -0.56 | 4.97E-07 | -0.60 | 8.08E-10 |
| ADAMTS18 | -1.76 | 4.98E-07 | -2.49 | 1.16E-12 |
| KRIT1    | -0.38 | 5.17E-07 | -0.23 | 6.93E-04 |
| NDUFAF2  | -0.64 | 5.17E-07 | -0.63 | 3.89E-09 |
| APOBEC3A | 1.00  | 5.18E-07 | 1.09  | 1.34E-07 |
| HLCS     | -0.40 | 5.22E-07 | -0.45 | 9.14E-11 |
| FANCE    | -0.57 | 5.25E-07 | -0.39 | 9.63E-04 |
| MAGEA11  | -6.85 | 5.25E-07 | -2.63 | 1.08E-07 |
| CD320    | -0.62 | 5.44E-07 | -0.44 | 1.17E-04 |
| PLAC8    | 1.09  | 5.51E-07 | 1.96  | 1.94E-14 |
| PSMD13   | -0.44 | 5.58E-07 | -0.41 | 6.37E-08 |
| SNX6     | -0.59 | 5.58E-07 | -0.53 | 7.29E-11 |
| ZMYND11  | 0.35  | 5.70E-07 | 0.31  | 5.23E-06 |
| AKR1A1   | -0.44 | 5.78E-07 | -0.45 | 2.34E-08 |
| BCR      | -0.49 | 6.00E-07 | -0.38 | 1.62E-04 |
| EDC3     | -0.38 | 6.04E-07 | -0.35 | 9.05E-10 |
| CCDC114  | 1.20  | 6.08E-07 | 1.56  | 8.94E-07 |
| GNB1L    | -0.65 | 6.08E-07 | -0.40 | 3.10E-03 |
| RFX5     | -0.41 | 6.11E-07 | -0.37 | 5.24E-06 |
| ZBTB46   | 0.56  | 6.18E-07 | 0.60  | 3.02E-06 |
| CLNK     | -1.55 | 6.24E-07 | -1.43 | 2.31E-07 |
| HDC      | 1.03  | 6.24E-07 | 1.60  | 9.57E-16 |
| IRAK2    | -0.81 | 6.36E-07 | -1.04 | 3.08E-10 |
| OLFM4    | -4.63 | 6.47E-07 | -1.62 | 6.66E-04 |
| RAB6B    | -0.92 | 6.53E-07 | -0.56 | 1.76E-03 |
| IFT20    | -0.52 | 6.59E-07 | -0.31 | 1.69E-03 |
| WDR36    | -0.34 | 6.64E-07 | -0.46 | 8.02E-10 |
| MAP4K3   | -0.38 | 6.70E-07 | -0.31 | 2.31E-05 |
| HUWE1    | -0.45 | 6.72E-07 | -0.59 | 1.41E-12 |
| PLCB3    | -0.46 | 6.76E-07 | -0.36 | 7.01E-05 |
| SLC35C1  | -0.63 | 6.76E-07 | -0.50 | 6.59E-06 |
| IRAK1BP1 | 0.58  | 6.95E-07 | 0.48  | 3.64E-04 |
| CDK13    | -0.31 | 6.98E-07 | -0.34 | 9.84E-10 |
| RBM25    | -0.37 | 7.06E-07 | -0.25 | 1.59E-04 |
| RUVBL2   | -0.47 | 7.13E-07 | -0.48 | 3.41E-07 |
| POLR2F   | -0.63 | 7.15E-07 | -0.39 | 8.65E-08 |
| HES1     | -0.76 | 7.17E-07 | -0.46 | 3.22E-03 |
| UBE2E3   | -0.49 | 7.24E-07 | -0.55 | 1.21E-11 |
| RRP8     | -0.36 | 7.46E-07 | -0.26 | 6.05E-04 |

|          |       |          |       |          |
|----------|-------|----------|-------|----------|
| TRAF3    | -0.41 | 7.48E-07 | -0.44 | 2.29E-07 |
| TSC2     | -0.43 | 7.48E-07 | -0.26 | 1.52E-04 |
| ALDOC    | -0.87 | 7.84E-07 | -0.52 | 2.59E-03 |
| RPS18    | -0.85 | 7.89E-07 | -0.64 | 7.30E-08 |
| YWHAQ    | -0.44 | 7.99E-07 | -0.52 | 5.31E-10 |
| PPM1K    | 0.56  | 8.05E-07 | 0.53  | 2.67E-07 |
| C8orf33  | -0.52 | 8.11E-07 | -0.51 | 4.97E-10 |
| MAGEA2   | -6.98 | 8.11E-07 | -2.71 | 3.55E-04 |
| PHEX     | 1.12  | 8.21E-07 | 1.33  | 7.06E-07 |
| FCAR     | 1.42  | 8.38E-07 | 1.01  | 1.28E-04 |
| HSPA4L   | -1.01 | 8.46E-07 | -1.21 | 4.71E-10 |
| ING1     | -0.51 | 8.49E-07 | -0.37 | 1.81E-05 |
| EYA4     | 1.40  | 8.52E-07 | 2.04  | 5.01E-15 |
| SLC30A10 | -5.64 | 8.54E-07 | -2.16 | 1.31E-04 |
| ATL3     | -0.52 | 8.67E-07 | -0.63 | 8.21E-20 |
| KLRD1    | 0.97  | 8.68E-07 | 1.28  | 9.03E-10 |
| COG7     | -0.39 | 8.69E-07 | -0.30 | 1.70E-04 |
| DGKQ     | -0.55 | 8.75E-07 | -0.28 | 5.14E-03 |
| S100A7   | -5.78 | 8.76E-07 | -2.87 | 4.48E-05 |
| AFP      | -6.15 | 8.83E-07 | -2.23 | 2.23E-05 |
| PAQR3    | -0.65 | 9.18E-07 | -0.58 | 4.86E-07 |
| CYSLTR1  | 0.84  | 9.25E-07 | 0.85  | 1.76E-08 |
| CDH2     | -1.87 | 9.30E-07 | -1.30 | 2.91E-04 |
| TREM2    | 0.84  | 9.31E-07 | 0.69  | 7.53E-04 |
| SERPINB4 | -3.61 | 9.51E-07 | -2.86 | 6.74E-05 |
| LIME1    | -0.89 | 9.73E-07 | -0.67 | 6.72E-05 |
| C2       | 0.83  | 9.90E-07 | 1.43  | 7.00E-15 |
| CFTR     | 1.28  | 1.01E-06 | 2.20  | 1.62E-10 |
| DDX1     | -0.35 | 1.01E-06 | -0.35 | 3.85E-07 |
| CYP17A1  | 1.80  | 1.02E-06 | 3.25  | 2.14E-27 |
| ITGB2    | 0.71  | 1.02E-06 | 0.55  | 9.10E-04 |
| NDUFV2   | -0.53 | 1.02E-06 | -0.35 | 7.62E-05 |
| PRDX1    | -0.62 | 1.02E-06 | -0.57 | 5.67E-07 |
| SDHAF2   | -0.35 | 1.02E-06 | -0.33 | 6.16E-07 |
| CD74     | 0.71  | 1.03E-06 | 0.89  | 3.96E-08 |
| CTLA4    | -0.97 | 1.03E-06 | -1.04 | 4.15E-07 |
| SWAP70   | 0.41  | 1.03E-06 | 0.33  | 5.28E-05 |
| LRFN2    | -2.92 | 1.04E-06 | -1.17 | 9.61E-03 |
| MYH1     | 1.83  | 1.04E-06 | 2.87  | 2.30E-16 |
| SFRP4    | -1.22 | 1.05E-06 | -1.40 | 1.92E-07 |
| ERMAP    | 0.44  | 1.07E-06 | 0.48  | 1.70E-08 |
| MC5R     | -2.71 | 1.07E-06 | -2.34 | 6.81E-07 |
| UBE4A    | -0.34 | 1.07E-06 | -0.33 | 2.75E-07 |

|          |       |          |       |          |
|----------|-------|----------|-------|----------|
| COG4     | -0.35 | 1.09E-06 | -0.25 | 2.40E-05 |
| XBP1     | -0.62 | 1.10E-06 | -0.40 | 8.95E-04 |
| CUL2     | -0.35 | 1.11E-06 | -0.39 | 1.05E-07 |
| HGSNAT   | -0.61 | 1.11E-06 | -0.53 | 5.61E-06 |
| PRKCB    | 0.72  | 1.11E-06 | 0.69  | 8.68E-07 |
| TMEM64   | 0.68  | 1.12E-06 | 0.65  | 8.01E-08 |
| ESYT2    | -0.45 | 1.13E-06 | -0.44 | 1.47E-07 |
| KPNA5    | 0.53  | 1.14E-06 | 0.45  | 6.96E-05 |
| USP42    | -0.39 | 1.14E-06 | -0.38 | 6.50E-06 |
| CCL28    | -1.18 | 1.16E-06 | -0.58 | 6.24E-03 |
| UBE2M    | -0.40 | 1.16E-06 | -0.30 | 1.59E-04 |
| SKA2     | -0.54 | 1.18E-06 | -0.50 | 3.64E-06 |
| FSTL3    | 0.80  | 1.19E-06 | 0.96  | 9.49E-10 |
| SIDT1    | -0.92 | 1.19E-06 | -0.69 | 7.74E-04 |
| SMARCA4  | -0.59 | 1.19E-06 | -0.45 | 7.66E-05 |
| INHBB    | -1.22 | 1.22E-06 | -0.83 | 1.94E-04 |
| EXOC6    | 0.37  | 1.23E-06 | 0.30  | 2.30E-04 |
| SLC25A1  | -0.47 | 1.23E-06 | -0.33 | 1.92E-04 |
| UBTF     | -0.28 | 1.25E-06 | -0.34 | 3.51E-08 |
| FBXO4    | -0.56 | 1.26E-06 | -0.42 | 1.50E-04 |
| KCNJ2    | 0.80  | 1.27E-06 | 0.77  | 1.66E-06 |
| RPGRIP1L | -0.59 | 1.27E-06 | -0.95 | 1.13E-09 |
| COG6     | -0.43 | 1.32E-06 | -0.44 | 5.08E-07 |
| SMURF1   | -0.48 | 1.32E-06 | -0.38 | 1.35E-04 |
| WFDC6    | 2.21  | 1.32E-06 | 4.12  | 2.20E-14 |
| PFKL     | -0.41 | 1.33E-06 | -0.38 | 4.63E-07 |
| NLRP7    | -1.57 | 1.38E-06 | -1.04 | 3.34E-05 |
| PIK3CG   | 0.74  | 1.39E-06 | 0.48  | 4.45E-03 |
| DLEC1    | 1.32  | 1.41E-06 | 2.10  | 5.91E-11 |
| LCAT     | 0.67  | 1.41E-06 | 1.20  | 1.66E-16 |
| ATP10A   | 0.81  | 1.43E-06 | 1.25  | 4.69E-11 |
| VMA21    | -0.40 | 1.43E-06 | -0.40 | 4.07E-12 |
| ITGB8    | -1.34 | 1.44E-06 | -0.96 | 5.21E-04 |
| PDE6A    | 1.13  | 1.45E-06 | 1.61  | 1.73E-10 |
| PSMA4    | -0.45 | 1.45E-06 | -0.40 | 8.27E-06 |
| CDR2     | -0.47 | 1.47E-06 | -0.57 | 1.24E-09 |
| ATG9A    | -0.32 | 1.48E-06 | -0.34 | 1.16E-07 |
| OMA1     | -0.43 | 1.48E-06 | -0.19 | 2.72E-02 |
| SMN2     | -0.45 | 1.49E-06 | -0.49 | 2.38E-10 |
| SLC9A2   | -2.06 | 1.54E-06 | -1.03 | 5.72E-03 |
| CD47     | 0.52  | 1.56E-06 | 0.65  | 1.10E-10 |
| SYNC     | 0.93  | 1.58E-06 | 1.73  | 1.04E-22 |
| TYMP     | -0.67 | 1.58E-06 | -0.45 | 3.89E-04 |

|          |       |          |       |          |
|----------|-------|----------|-------|----------|
| SIL1     | -0.57 | 1.60E-06 | -0.50 | 5.67E-07 |
| PLP1     | 1.83  | 1.61E-06 | 2.85  | 1.11E-16 |
| WDR37    | 0.36  | 1.61E-06 | 0.42  | 1.81E-09 |
| CHST4    | -1.73 | 1.62E-06 | -1.28 | 3.76E-04 |
| PPP2R1B  | -0.56 | 1.62E-06 | -0.44 | 1.76E-07 |
| DRD4     | -1.28 | 1.63E-06 | -0.80 | 2.29E-03 |
| BTBD6    | -0.46 | 1.68E-06 | -0.23 | 4.68E-03 |
| LACTB    | 0.39  | 1.70E-06 | 0.26  | 1.65E-03 |
| PIH1D2   | 0.74  | 1.71E-06 | 0.63  | 4.66E-03 |
| PSMC3    | -0.38 | 1.73E-06 | -0.36 | 9.92E-10 |
| RPL23    | -0.57 | 1.73E-06 | -0.32 | 1.28E-03 |
| AOAH     | 0.77  | 1.74E-06 | 0.62  | 4.35E-04 |
| GSN      | 0.57  | 1.75E-06 | 0.64  | 4.32E-09 |
| ORAI2    | -0.52 | 1.75E-06 | -0.61 | 2.76E-09 |
| RAP1GAP2 | -0.76 | 1.75E-06 | -0.35 | 3.54E-02 |
| RGS12    | 0.44  | 1.76E-06 | 0.57  | 7.48E-09 |
| NNT      | -0.53 | 1.77E-06 | -0.45 | 2.14E-05 |
| SLC40A1  | 0.72  | 1.78E-06 | 0.81  | 6.70E-07 |
| HLA-DQA1 | 0.93  | 1.79E-06 | 0.98  | 1.10E-07 |
| STK3     | -0.40 | 1.83E-06 | -0.40 | 7.84E-08 |
| RYR2     | 1.00  | 1.84E-06 | 1.74  | 1.94E-23 |
| FOLH1    | -1.12 | 1.85E-06 | -0.96 | 1.37E-04 |
| RPS6KA2  | 0.61  | 1.88E-06 | 0.85  | 2.82E-12 |
| MTDH     | -0.38 | 1.89E-06 | -0.44 | 2.08E-08 |
| TSPO     | 0.55  | 1.89E-06 | 0.58  | 6.51E-08 |
| TAT      | -1.58 | 1.90E-06 | -0.96 | 6.08E-03 |
| IFNE     | -2.70 | 1.95E-06 | -2.16 | 9.38E-07 |
| LRRC4C   | 0.78  | 1.96E-06 | 0.75  | 1.49E-04 |
| IGBP1    | -0.41 | 1.97E-06 | -0.42 | 6.01E-07 |
| DSC2     | -0.83 | 1.98E-06 | -0.92 | 2.75E-09 |
| CXCL9    | -1.37 | 2.04E-06 | -0.88 | 2.18E-03 |
| KCNA3    | 0.92  | 2.04E-06 | 1.22  | 2.89E-06 |
| GGT5     | -0.76 | 2.05E-06 | -0.84 | 1.35E-08 |
| RAD52    | -0.55 | 2.06E-06 | -0.29 | 4.73E-03 |
| TRIB1    | 0.57  | 2.07E-06 | 0.51  | 1.63E-03 |
| ULK4     | 0.60  | 2.11E-06 | 0.59  | 1.79E-04 |
| OGDH     | 0.35  | 2.15E-06 | 0.23  | 2.49E-03 |
| DNM1L    | -0.44 | 2.16E-06 | -0.47 | 7.79E-08 |
| CCL20    | -1.68 | 2.17E-06 | -1.25 | 9.21E-04 |
| CR1      | 0.85  | 2.17E-06 | 0.48  | 1.52E-02 |
| PTGFR    | 1.24  | 2.19E-06 | 2.18  | 6.32E-25 |
| TRIM69   | -0.81 | 2.19E-06 | -0.59 | 9.91E-04 |
| UBE2V1   | -0.30 | 2.19E-06 | -0.32 | 1.62E-08 |

|           |       |          |       |          |
|-----------|-------|----------|-------|----------|
| CFL1      | -0.33 | 2.20E-06 | -0.44 | 2.09E-10 |
| DOT1L     | 0.48  | 2.24E-06 | 0.64  | 3.17E-09 |
| RPS16     | -0.69 | 2.24E-06 | -0.54 | 1.16E-05 |
| POP4      | -0.53 | 2.26E-06 | -0.44 | 8.19E-07 |
| MAGEA4    | -8.92 | 2.27E-06 | -1.47 | 1.64E-02 |
| IRS1      | -0.81 | 2.33E-06 | -0.85 | 6.31E-07 |
| WBP2      | 0.33  | 2.34E-06 | 0.36  | 1.26E-07 |
| APTX      | -0.37 | 2.41E-06 | -0.20 | 6.42E-03 |
| CCL4      | 0.82  | 2.47E-06 | 0.56  | 8.33E-03 |
| RPS6KA4   | -0.42 | 2.48E-06 | -0.41 | 4.27E-07 |
| MYLK2     | -0.99 | 2.52E-06 | -0.88 | 1.72E-03 |
| AKAP5     | 0.65  | 2.54E-06 | 0.92  | 2.96E-12 |
| TYRP1     | 1.13  | 2.56E-06 | 2.02  | 5.98E-17 |
| PSMB7     | -0.44 | 2.60E-06 | -0.43 | 2.48E-08 |
| RPP30     | -0.34 | 2.60E-06 | -0.30 | 5.15E-05 |
| CXCL13    | -1.51 | 2.62E-06 | -3.90 | 7.13E-18 |
| CDC25B    | -0.63 | 2.64E-06 | -0.39 | 1.42E-03 |
| TLR9      | -0.89 | 2.64E-06 | -0.93 | 7.39E-09 |
| CSF3R     | 0.96  | 2.67E-06 | 1.96  | 3.12E-23 |
| TOB2      | 0.37  | 2.67E-06 | 0.37  | 2.16E-06 |
| IBSP      | -2.33 | 2.74E-06 | -4.33 | 1.21E-18 |
| TIPARP    | 0.73  | 2.74E-06 | 0.71  | 3.34E-05 |
| HLA-DQA2  | 0.94  | 2.81E-06 | 0.85  | 9.26E-06 |
| CCNK      | -0.32 | 2.83E-06 | -0.29 | 1.55E-05 |
| KLHL5     | -0.62 | 2.84E-06 | -0.61 | 7.81E-08 |
| GP6       | 1.09  | 2.88E-06 | 1.73  | 1.32E-12 |
| TNFRSF10B | -0.53 | 2.88E-06 | -0.31 | 1.56E-02 |
| EVC       | 0.51  | 2.93E-06 | 0.45  | 2.33E-04 |
| CYP20A1   | 0.29  | 2.94E-06 | 0.21  | 8.17E-04 |
| TH        | -2.70 | 2.95E-06 | -1.03 | 3.54E-02 |
| FBXL18    | -0.64 | 2.99E-06 | -0.41 | 1.59E-03 |
| PDE11A    | -1.50 | 3.00E-06 | -0.93 | 1.58E-03 |
| GLRB      | -0.86 | 3.02E-06 | -0.64 | 1.65E-04 |
| PKP1      | -2.12 | 3.02E-06 | -0.96 | 9.70E-03 |
| SEC16A    | -0.40 | 3.02E-06 | -0.36 | 2.04E-05 |
| HARS      | -0.30 | 3.04E-06 | -0.40 | 1.52E-11 |
| SNX27     | -0.39 | 3.06E-06 | -0.38 | 4.70E-07 |
| FYN       | 0.51  | 3.12E-06 | 0.54  | 1.86E-05 |
| LHCGR     | -2.65 | 3.19E-06 | -1.30 | 3.75E-02 |
| TXNDC2    | -1.69 | 3.21E-06 | -0.65 | 7.44E-03 |
| KCNK2     | -2.19 | 3.22E-06 | -1.28 | 1.40E-03 |
| PPP2R5B   | 0.42  | 3.22E-06 | 0.42  | 2.59E-07 |
| DCDC2     | 1.13  | 3.23E-06 | 2.32  | 3.41E-16 |

|          |       |          |       |          |
|----------|-------|----------|-------|----------|
| CRLF2    | -2.04 | 3.32E-06 | -1.55 | 4.40E-04 |
| PEX16    | -0.43 | 3.33E-06 | -0.29 | 5.49E-05 |
| PLCB1    | -0.91 | 3.33E-06 | -0.57 | 1.41E-03 |
| IL12B    | -1.12 | 3.36E-06 | -0.52 | 3.34E-02 |
| IL27     | 0.97  | 3.36E-06 | 1.05  | 1.18E-05 |
| PDCD1    | -1.00 | 3.40E-06 | -1.07 | 2.01E-09 |
| LARS     | -0.34 | 3.43E-06 | -0.45 | 1.74E-11 |
| MAP3K14  | 0.52  | 3.50E-06 | 0.66  | 1.54E-06 |
| HHEX     | 0.60  | 3.52E-06 | 0.52  | 2.16E-05 |
| FAM19A3  | -2.08 | 3.55E-06 | -1.59 | 8.25E-05 |
| RPA2     | -0.38 | 3.71E-06 | -0.50 | 1.48E-11 |
| MAGEA1   | -6.89 | 3.80E-06 | -3.99 | 6.28E-11 |
| SNX20    | 0.64  | 3.80E-06 | 0.54  | 4.27E-04 |
| TCP1     | -0.40 | 3.87E-06 | -0.55 | 2.41E-12 |
| SLAIN2   | 0.28  | 3.88E-06 | 0.29  | 3.59E-08 |
| KRT20    | -5.30 | 3.99E-06 | -1.92 | 1.27E-03 |
| TOR1AIP1 | 0.28  | 4.02E-06 | 0.18  | 6.45E-03 |
| SAMSN1   | 0.64  | 4.14E-06 | 0.46  | 5.26E-03 |
| TFF2     | -7.55 | 4.18E-06 | -2.97 | 5.93E-06 |
| ZFP36L2  | 0.46  | 4.26E-06 | 0.34  | 3.31E-04 |
| ARHGAP17 | 0.27  | 4.38E-06 | 0.22  | 2.05E-03 |
| ZFC3H1   | -0.43 | 4.53E-06 | -0.31 | 1.01E-03 |
| EPB41    | -0.41 | 4.62E-06 | -0.31 | 2.25E-04 |
| PRLR     | -1.51 | 4.63E-06 | -0.75 | 2.72E-02 |
| KCNH4    | -1.16 | 4.66E-06 | -0.99 | 1.54E-04 |
| LTA      | -0.92 | 4.74E-06 | -1.26 | 1.28E-10 |
| PSMD8    | -0.44 | 4.74E-06 | -0.50 | 2.66E-09 |
| SLC3A2   | -0.48 | 4.86E-06 | -0.33 | 1.66E-04 |
| PRKCDBP  | 0.64  | 4.89E-06 | 0.48  | 4.74E-05 |
| DAZAP2   | 0.28  | 4.90E-06 | 0.30  | 9.93E-07 |
| IRF1     | 0.58  | 4.98E-06 | 0.65  | 4.27E-07 |
| MAL      | 0.97  | 5.04E-06 | 1.70  | 9.12E-15 |
| ID1      | 0.85  | 5.06E-06 | 1.27  | 1.00E-09 |
| PXDN     | -0.85 | 5.22E-06 | -1.19 | 4.73E-09 |
| NLK      | -0.35 | 5.28E-06 | -0.15 | 2.30E-02 |
| UNC13B   | 0.61  | 5.28E-06 | 1.33  | 4.35E-19 |
| S100B    | -1.26 | 5.30E-06 | -0.81 | 3.22E-03 |
| RNASET2  | -0.63 | 5.32E-06 | -0.48 | 1.42E-05 |
| SMAD1    | -0.55 | 5.32E-06 | -0.78 | 8.78E-16 |
| SCRN3    | -0.36 | 5.33E-06 | -0.23 | 6.86E-04 |
| TRIP12   | -0.32 | 5.33E-06 | -0.49 | 2.85E-13 |
| GSTA4    | 0.69  | 5.39E-06 | 1.26  | 7.77E-15 |
| RNF216   | -0.32 | 5.44E-06 | -0.34 | 3.15E-06 |

|          |       |          |       |          |
|----------|-------|----------|-------|----------|
| RNF25    | -0.32 | 5.44E-06 | -0.21 | 8.06E-04 |
| VEZF1    | 0.30  | 5.46E-06 | 0.21  | 7.19E-03 |
| ARHGAP15 | 0.62  | 5.47E-06 | 0.58  | 4.17E-05 |
| PARD3    | -0.47 | 5.47E-06 | -0.39 | 5.06E-05 |
| EDC4     | -0.35 | 5.53E-06 | -0.26 | 8.80E-05 |
| FZD5     | 0.52  | 5.53E-06 | 0.83  | 7.40E-12 |
| NRG1     | 1.13  | 5.54E-06 | 1.88  | 8.19E-17 |
| IQGAP2   | 0.74  | 5.56E-06 | 0.68  | 3.09E-05 |
| SMG1     | -0.44 | 5.60E-06 | -0.40 | 2.65E-06 |
| CSNK1E   | -0.44 | 5.62E-06 | -0.33 | 7.67E-05 |
| CD22     | 0.87  | 5.64E-06 | 0.90  | 2.36E-04 |
| MAP2K5   | 0.33  | 5.64E-06 | 0.30  | 3.38E-05 |
| CACNA1B  | -2.82 | 5.67E-06 | -1.60 | 1.20E-02 |
| CHAT     | -6.18 | 5.70E-06 | -1.15 | 7.33E-03 |
| AP1M1    | 0.28  | 5.88E-06 | 0.28  | 6.82E-06 |
| SEMA7A   | -0.88 | 5.88E-06 | -1.02 | 3.00E-09 |
| PRKRA    | -0.33 | 5.89E-06 | -0.28 | 3.75E-05 |
| ALPL     | 1.10  | 5.90E-06 | 2.18  | 3.59E-13 |
| CTSK     | -0.81 | 5.91E-06 | -1.18 | 2.10E-10 |
| CD58     | 0.45  | 5.95E-06 | 0.45  | 2.85E-04 |
| PSMA7    | -0.47 | 6.18E-06 | -0.44 | 4.22E-07 |
| SPON1    | 0.74  | 6.26E-06 | 0.40  | 8.52E-03 |
| VCP      | -0.28 | 6.31E-06 | -0.34 | 7.57E-08 |
| SCYL2    | -0.35 | 6.34E-06 | -0.32 | 2.36E-06 |
| TUBA3C   | -6.17 | 6.40E-06 | -1.53 | 6.80E-03 |
| CEBPZ    | -0.30 | 6.44E-06 | -0.28 | 2.97E-05 |
| IL6ST    | 0.69  | 6.50E-06 | 0.65  | 1.31E-07 |
| DYX1C1   | 0.57  | 6.59E-06 | 0.67  | 6.37E-05 |
| SMARCAD1 | -0.31 | 6.63E-06 | -0.46 | 5.55E-12 |
| CNPY3    | -0.34 | 6.64E-06 | -0.26 | 3.01E-04 |
| CAPN3    | 0.87  | 6.70E-06 | 2.16  | 9.00E-26 |
| ANXA5    | 0.37  | 6.83E-06 | 0.20  | 1.15E-02 |
| POM121   | -0.35 | 6.85E-06 | -0.45 | 7.12E-08 |
| UQCRC1   | -0.38 | 6.94E-06 | -0.36 | 6.54E-07 |
| PBX1     | 0.63  | 6.98E-06 | 0.62  | 1.74E-04 |
| PWP1     | -0.33 | 7.03E-06 | -0.30 | 4.85E-05 |
| NOL9     | -0.39 | 7.17E-06 | -0.52 | 2.60E-11 |
| CLDN1    | -1.11 | 7.22E-06 | -0.91 | 4.66E-04 |
| SMAD4    | 0.32  | 7.25E-06 | 0.34  | 1.41E-05 |
| BCL11A   | -0.94 | 7.28E-06 | -0.62 | 2.60E-03 |
| EPHA6    | -2.21 | 7.30E-06 | -1.21 | 3.70E-03 |
| SQSTM1   | -0.58 | 7.47E-06 | -0.35 | 1.19E-03 |
| KIF6     | 1.06  | 7.74E-06 | 1.35  | 2.28E-08 |

|          |       |          |       |          |
|----------|-------|----------|-------|----------|
| POT1     | -0.44 | 8.04E-06 | -0.55 | 3.67E-10 |
| YTHDF2   | -0.27 | 8.05E-06 | -0.27 | 1.07E-05 |
| CX3CL1   | 0.87  | 8.10E-06 | 1.33  | 3.40E-09 |
| ADK      | -0.56 | 8.31E-06 | -0.51 | 1.61E-05 |
| UBE4B    | -0.35 | 8.31E-06 | -0.34 | 2.31E-07 |
| SBF1     | -0.45 | 8.33E-06 | -0.33 | 2.58E-04 |
| PLRG1    | -0.39 | 8.45E-06 | -0.41 | 9.91E-11 |
| KLB      | 1.37  | 8.58E-06 | 3.41  | 4.03E-51 |
| GDI2     | -0.35 | 8.80E-06 | -0.47 | 1.05E-07 |
| NMT1     | -0.25 | 8.85E-06 | -0.25 | 1.25E-06 |
| CD177    | -2.27 | 8.87E-06 | -0.89 | 9.93E-03 |
| SETDB2   | 0.34  | 8.87E-06 | 0.42  | 1.37E-07 |
| CYP7B1   | -0.71 | 8.93E-06 | -0.73 | 7.44E-08 |
| PRPF6    | -0.37 | 9.00E-06 | -0.29 | 1.29E-06 |
| MORF4L1  | 0.30  | 9.08E-06 | 0.19  | 2.52E-02 |
| CSPG4    | 0.66  | 9.11E-06 | 0.74  | 4.70E-07 |
| PDLIM7   | -0.54 | 9.11E-06 | -0.68 | 5.95E-08 |
| SHC3     | 0.92  | 9.16E-06 | 1.61  | 8.12E-10 |
| POLR2K   | -0.49 | 9.17E-06 | -0.37 | 1.03E-04 |
| CTSW     | 0.81  | 9.21E-06 | 1.34  | 4.05E-17 |
| SLC27A2  | -1.05 | 9.44E-06 | -1.06 | 3.27E-04 |
| MYPN     | -2.86 | 9.46E-06 | -1.40 | 1.03E-02 |
| IFT140   | 0.54  | 9.53E-06 | 0.87  | 1.36E-12 |
| NARS     | -0.36 | 9.56E-06 | -0.33 | 1.55E-06 |
| GUSB     | -0.43 | 9.60E-06 | -0.34 | 3.53E-04 |
| TAGLN    | 0.65  | 9.67E-06 | 0.36  | 3.91E-02 |
| MPL      | 0.54  | 9.70E-06 | 0.47  | 3.70E-04 |
| AP2A1    | -0.32 | 9.73E-06 | -0.39 | 9.64E-08 |
| SMARCE1  | -0.33 | 9.79E-06 | -0.25 | 5.82E-06 |
| HLA-DMB  | 0.65  | 9.80E-06 | 0.80  | 1.87E-06 |
| APBA3    | -0.38 | 1.01E-05 | -0.39 | 1.12E-07 |
| DYNLT1   | -0.51 | 1.01E-05 | -0.38 | 1.25E-04 |
| ORAI1    | 0.35  | 1.01E-05 | 0.37  | 4.83E-06 |
| COL4A5   | 0.94  | 1.02E-05 | 1.60  | 1.82E-17 |
| COTL1    | 0.51  | 1.02E-05 | 0.31  | 7.07E-03 |
| TNFRSF4  | -0.68 | 1.02E-05 | -0.80 | 1.13E-06 |
| ASS1     | -0.85 | 1.03E-05 | -0.46 | 4.89E-03 |
| USP36    | -0.33 | 1.03E-05 | -0.22 | 1.82E-03 |
| ZHX2     | 0.35  | 1.03E-05 | 0.25  | 1.88E-03 |
| GNAZ     | 0.92  | 1.04E-05 | 1.32  | 1.00E-06 |
| KIAA0895 | -0.60 | 1.05E-05 | -0.49 | 1.47E-05 |
| TBC1D20  | 0.27  | 1.05E-05 | 0.33  | 5.38E-09 |
| KIF7     | -0.79 | 1.06E-05 | -0.66 | 3.75E-04 |



|           |       |          |       |          |
|-----------|-------|----------|-------|----------|
| DTX3L     | -0.39 | 1.07E-05 | -0.42 | 1.56E-09 |
| LILRA3    | 1.05  | 1.07E-05 | 0.87  | 4.00E-04 |
| PPP2R1A   | -0.28 | 1.09E-05 | -0.23 | 8.97E-04 |
| GPR89B    | -0.81 | 1.11E-05 | -0.65 | 1.14E-03 |
| NMT2      | 0.42  | 1.11E-05 | 0.28  | 5.51E-03 |
| SIM1      | -3.78 | 1.11E-05 | -1.72 | 1.55E-03 |
| MCRS1     | -0.34 | 1.12E-05 | -0.19 | 2.31E-03 |
| OPRD1     | -4.23 | 1.13E-05 | -2.24 | 4.13E-06 |
| BCL7C     | -0.51 | 1.14E-05 | -0.39 | 1.61E-06 |
| AFAP1     | -0.47 | 1.15E-05 | -0.65 | 3.20E-09 |
| CCL21     | 0.85  | 1.15E-05 | 0.78  | 6.72E-04 |
| CLEC2B    | 0.66  | 1.18E-05 | 0.59  | 4.84E-04 |
| TNIP2     | -0.35 | 1.18E-05 | -0.25 | 2.58E-04 |
| TSPAN33   | -0.70 | 1.19E-05 | -0.73 | 7.88E-08 |
| ANK1      | -1.22 | 1.20E-05 | -0.81 | 6.30E-03 |
| PYGL      | -0.69 | 1.20E-05 | -0.39 | 5.61E-03 |
| ADAM19    | -0.71 | 1.21E-05 | -1.13 | 4.40E-14 |
| RMND1     | -0.39 | 1.21E-05 | -0.41 | 1.63E-06 |
| AXIN2     | 0.73  | 1.23E-05 | 1.16  | 1.05E-16 |
| IQCB1     | -0.43 | 1.23E-05 | -0.26 | 5.76E-03 |
| SAE1      | -0.33 | 1.23E-05 | -0.40 | 2.59E-09 |
| SAT2      | 0.46  | 1.23E-05 | 0.72  | 1.01E-13 |
| PTGDR     | 0.74  | 1.26E-05 | 0.95  | 1.63E-06 |
| SBNO2     | -0.52 | 1.26E-05 | -0.59 | 2.28E-08 |
| BACH2     | 0.65  | 1.27E-05 | 0.45  | 6.42E-03 |
| HAAO      | 0.53  | 1.28E-05 | 0.54  | 6.92E-06 |
| TNFRSF10D | 0.63  | 1.28E-05 | 0.85  | 3.30E-08 |
| ATP2C1    | 0.37  | 1.29E-05 | 0.31  | 1.43E-04 |
| TRIM68    | -0.58 | 1.29E-05 | -0.27 | 3.69E-02 |
| IFIT3     | 0.61  | 1.33E-05 | 0.75  | 1.26E-08 |
| PRKAB2    | -0.48 | 1.33E-05 | -0.31 | 4.38E-03 |
| POM121C   | -0.35 | 1.34E-05 | -0.49 | 3.01E-10 |
| SART3     | -0.28 | 1.34E-05 | -0.23 | 1.06E-03 |
| ARID4B    | -0.32 | 1.35E-05 | -0.28 | 1.46E-05 |
| ERCC6     | -0.41 | 1.37E-05 | -0.33 | 1.61E-04 |
| DNM3      | 0.81  | 1.38E-05 | 1.12  | 1.26E-08 |
| ERRFI1    | -0.81 | 1.38E-05 | -0.71 | 3.25E-05 |
| RAD21     | -0.44 | 1.39E-05 | -0.34 | 2.56E-04 |
| DKKL1     | -1.28 | 1.41E-05 | -0.66 | 6.01E-03 |
| PRKAR1A   | 0.30  | 1.41E-05 | 0.25  | 4.79E-04 |
| PPA1      | -0.43 | 1.43E-05 | -0.28 | 1.19E-03 |
| SAGE1     | -4.80 | 1.44E-05 | -1.31 | 1.23E-02 |
| MAPK12    | -0.73 | 1.46E-05 | -0.60 | 5.57E-05 |

|          |       |          |       |          |
|----------|-------|----------|-------|----------|
| PEBP1    | 0.40  | 1.47E-05 | 0.65  | 7.70E-12 |
| CLEC7A   | 0.66  | 1.48E-05 | 0.63  | 3.71E-04 |
| CSTA     | 0.90  | 1.48E-05 | 1.28  | 5.02E-16 |
| KCNH1    | -1.14 | 1.48E-05 | -0.63 | 1.46E-02 |
| TXLNB    | 0.73  | 1.48E-05 | 0.73  | 7.40E-04 |
| FTL      | 0.60  | 1.49E-05 | 0.69  | 1.55E-07 |
| LSP1     | 0.55  | 1.51E-05 | 0.38  | 1.59E-02 |
| IPP      | -0.37 | 1.56E-05 | -0.52 | 1.55E-09 |
| PIK3C2A  | 0.31  | 1.59E-05 | 0.32  | 9.71E-06 |
| SNRNP27  | -0.29 | 1.59E-05 | -0.27 | 9.41E-05 |
| FBXW4    | 0.42  | 1.61E-05 | 0.63  | 1.43E-15 |
| MED18    | -0.38 | 1.61E-05 | -0.39 | 9.41E-05 |
| SSX4     | -4.29 | 1.62E-05 | -1.69 | 4.29E-04 |
| APOBEC3F | -0.56 | 1.63E-05 | -0.46 | 2.40E-04 |
| RETNLB   | -3.54 | 1.64E-05 | -1.71 | 5.68E-05 |
| SEPSECS  | -0.39 | 1.64E-05 | -0.23 | 2.18E-02 |
| LPA      | 1.86  | 1.65E-05 | 3.15  | 5.33E-13 |
| SLC45A2  | -1.73 | 1.65E-05 | -1.14 | 1.79E-03 |
| KLK3     | 3.86  | 1.70E-05 | 1.60  | 3.66E-03 |
| AHSP     | 1.51  | 1.71E-05 | 1.40  | 5.51E-06 |
| CD70     | -1.07 | 1.72E-05 | -1.12 | 5.95E-05 |
| SLC16A1  | -1.14 | 1.72E-05 | -0.70 | 1.25E-03 |
| NKAP     | -0.28 | 1.75E-05 | -0.28 | 2.75E-07 |
| PFKFB2   | 0.55  | 1.75E-05 | 0.90  | 1.25E-14 |
| CTSH     | 0.82  | 1.76E-05 | 1.65  | 1.02E-16 |
| DHODH    | -0.44 | 1.76E-05 | -0.30 | 3.28E-04 |
| UROS     | -0.39 | 1.77E-05 | -0.31 | 1.25E-04 |
| CHI3L1   | -1.21 | 1.78E-05 | -0.90 | 1.94E-04 |
| SPTBN4   | -1.08 | 1.78E-05 | -0.58 | 7.69E-03 |
| LMX1B    | -1.90 | 1.81E-05 | -1.34 | 3.64E-03 |
| FSCN1    | -0.88 | 1.85E-05 | -1.15 | 5.52E-09 |
| MLLT1    | 0.34  | 1.87E-05 | 0.37  | 1.16E-05 |
| ZNF395   | 0.39  | 1.87E-05 | 0.47  | 1.35E-08 |
| CRIP3    | -1.67 | 1.89E-05 | -0.72 | 1.64E-02 |
| PLCD1    | 0.52  | 1.91E-05 | 0.80  | 1.59E-15 |
| RFXANK   | -0.42 | 1.91E-05 | -0.24 | 1.83E-03 |
| LONRF3   | 0.56  | 1.98E-05 | 0.78  | 1.35E-06 |
| POMP     | -0.44 | 1.98E-05 | -0.30 | 3.02E-04 |
| MAN2A1   | -0.58 | 1.99E-05 | -0.89 | 2.34E-14 |
| SAA2     | -1.82 | 1.99E-05 | -1.63 | 5.04E-04 |
| ITGB3    | -1.17 | 2.01E-05 | -0.72 | 2.02E-03 |
| SCN5A    | -1.51 | 2.03E-05 | -1.11 | 1.33E-04 |
| MLH3     | -0.33 | 2.05E-05 | -0.27 | 1.06E-04 |

|         |       |          |       |          |
|---------|-------|----------|-------|----------|
| GPR34   | 0.67  | 2.07E-05 | 0.46  | 1.03E-02 |
| AICDA   | 1.11  | 2.09E-05 | 0.81  | 7.70E-03 |
| MMP8    | -1.65 | 2.11E-05 | -2.17 | 4.60E-08 |
| YPEL5   | 0.35  | 2.11E-05 | 0.36  | 3.16E-05 |
| DSCR8   | -6.85 | 2.12E-05 | -3.88 | 1.27E-12 |
| HAMP    | -1.30 | 2.15E-05 | -2.17 | 6.85E-10 |
| NOV     | 0.73  | 2.15E-05 | 0.57  | 3.09E-03 |
| RBMXL1  | 0.28  | 2.15E-05 | 0.18  | 2.64E-03 |
| SEC61B  | -0.41 | 2.15E-05 | -0.31 | 7.58E-05 |
| CSAG2   | -7.52 | 2.16E-05 | -2.92 | 3.14E-09 |
| PDE6D   | -0.34 | 2.16E-05 | -0.42 | 2.12E-09 |
| CARD9   | 0.69  | 2.18E-05 | 1.16  | 1.52E-12 |
| PSMD10  | -0.37 | 2.19E-05 | -0.45 | 9.46E-10 |
| SMC3    | -0.39 | 2.22E-05 | -0.46 | 1.44E-07 |
| ITGAE   | 0.51  | 2.27E-05 | 0.48  | 9.45E-04 |
| SH2D2A  | -0.67 | 2.27E-05 | -0.84 | 9.93E-07 |
| LARS2   | -0.29 | 2.28E-05 | -0.46 | 7.27E-12 |
| MAGEA10 | -6.82 | 2.30E-05 | -2.62 | 8.65E-08 |
| TAP1    | -0.67 | 2.32E-05 | -0.40 | 8.51E-04 |
| ALG12   | -0.36 | 2.34E-05 | -0.19 | 1.21E-02 |
| CLC     | 1.94  | 2.34E-05 | 1.14  | 5.90E-03 |
| FLOT1   | -0.40 | 2.34E-05 | -0.17 | 2.13E-02 |
| SLC9A4  | -3.82 | 2.35E-05 | -2.09 | 8.14E-04 |
| LRG1    | -0.85 | 2.37E-05 | -0.51 | 9.84E-03 |
| MYL4    | 0.92  | 2.41E-05 | 0.90  | 3.36E-04 |
| WFDC12  | 2.03  | 2.44E-05 | 4.78  | 2.92E-21 |
| NRXN1   | 1.54  | 2.51E-05 | 2.58  | 5.89E-13 |
| PDE4C   | 0.87  | 2.56E-05 | 1.99  | 1.70E-14 |
| TLR10   | -1.05 | 2.61E-05 | -1.26 | 7.92E-09 |
| TPM3    | -0.29 | 2.67E-05 | -0.42 | 5.03E-08 |
| ELF1    | 0.29  | 2.71E-05 | 0.21  | 5.23E-03 |
| LILRB5  | 0.77  | 2.72E-05 | 0.63  | 3.80E-03 |
| DENND5B | -0.65 | 2.75E-05 | -0.83 | 3.34E-08 |
| PIN1    | 0.34  | 2.81E-05 | 0.36  | 1.08E-07 |
| GDF11   | -0.57 | 2.86E-05 | -0.37 | 1.15E-02 |
| JMJD1C  | 0.34  | 2.86E-05 | 0.25  | 4.64E-03 |
| RBL2    | 0.34  | 2.88E-05 | 0.40  | 4.78E-08 |
| WASL    | -0.33 | 2.88E-05 | -0.33 | 7.79E-07 |
| MAPK3   | 0.33  | 2.89E-05 | 0.32  | 6.18E-05 |
| RYR3    | 0.86  | 2.90E-05 | 0.72  | 2.04E-04 |
| TMBIM1  | 0.39  | 2.90E-05 | 0.41  | 2.95E-05 |
| DNAJC3  | -0.35 | 2.91E-05 | -0.38 | 9.65E-06 |
| ARID1A  | -0.36 | 2.93E-05 | -0.44 | 4.34E-09 |

|         |       |          |       |          |
|---------|-------|----------|-------|----------|
| KRT7    | -0.78 | 2.93E-05 | -0.41 | 3.51E-02 |
| PINK1   | 0.33  | 2.97E-05 | 0.32  | 1.80E-05 |
| PPP1CC  | -0.34 | 2.98E-05 | -0.31 | 3.56E-05 |
| ZNF142  | -0.31 | 3.01E-05 | -0.33 | 7.08E-06 |
| MPV17   | -0.37 | 3.04E-05 | -0.27 | 2.31E-03 |
| CLEC11A | -0.58 | 3.08E-05 | -0.78 | 1.84E-08 |
| EBI3    | -0.74 | 3.09E-05 | -0.68 | 4.49E-06 |
| CBX5    | -0.43 | 3.10E-05 | -0.46 | 1.58E-07 |
| CD9     | 0.51  | 3.11E-05 | 0.79  | 1.24E-11 |
| VPS54   | -0.30 | 3.11E-05 | -0.24 | 7.71E-05 |
| RPS24   | -0.52 | 3.14E-05 | -0.27 | 1.34E-02 |
| LBP     | -3.24 | 3.15E-05 | -2.21 | 1.48E-04 |
| ADAMTS9 | 0.74  | 3.24E-05 | 0.42  | 3.93E-02 |
| GNMT    | 0.93  | 3.24E-05 | 1.97  | 2.93E-16 |
| IFNAR2  | -0.40 | 3.24E-05 | -0.35 | 3.04E-06 |
| DUSP7   | 0.41  | 3.26E-05 | 0.36  | 1.31E-03 |
| RPL7    | -0.51 | 3.27E-05 | -0.28 | 8.45E-03 |
| ZNF318  | -0.38 | 3.28E-05 | -0.24 | 1.58E-03 |
| CPT1C   | -0.99 | 3.35E-05 | -0.74 | 8.88E-04 |
| G6PC3   | -0.38 | 3.49E-05 | -0.35 | 2.03E-05 |
| DOK1    | 0.36  | 3.54E-05 | 0.41  | 1.61E-07 |
| ZBTB17  | -0.34 | 3.54E-05 | -0.23 | 4.78E-03 |
| EGLN1   | -0.43 | 3.61E-05 | -0.41 | 2.69E-06 |
| PGD     | -0.71 | 3.61E-05 | -0.53 | 3.19E-04 |
| WIPF3   | -1.11 | 3.64E-05 | -1.15 | 5.88E-04 |
| FLT1    | 0.51  | 3.73E-05 | 0.41  | 1.59E-03 |
| TRIM10  | -2.17 | 3.74E-05 | -1.25 | 2.33E-03 |
| CDC23   | -0.25 | 3.80E-05 | -0.31 | 5.25E-07 |
| EPHX2   | 0.64  | 3.80E-05 | 1.22  | 9.57E-11 |
| KLRB1   | 0.71  | 3.89E-05 | 0.68  | 1.88E-04 |
| MID2    | 0.41  | 3.89E-05 | 0.26  | 4.22E-03 |
| RGS2    | 0.73  | 3.89E-05 | 0.68  | 1.43E-05 |
| MRPL40  | -0.42 | 3.92E-05 | -0.30 | 1.81E-03 |
| LIMK2   | 0.40  | 4.02E-05 | 0.39  | 1.64E-05 |
| NCEH1   | 0.52  | 4.08E-05 | 0.55  | 4.47E-06 |
| BTF3    | -0.40 | 4.13E-05 | -0.41 | 8.34E-07 |
| FAM110B | 0.69  | 4.17E-05 | 0.76  | 1.97E-07 |
| RAC1    | -0.33 | 4.20E-05 | -0.34 | 2.71E-06 |
| METRNL  | 0.50  | 4.24E-05 | 0.46  | 1.08E-06 |
| PTMS    | 0.46  | 4.24E-05 | 0.66  | 1.99E-09 |
| GIP     | -3.42 | 4.27E-05 | -2.15 | 3.61E-06 |
| SOAT1   | -0.38 | 4.27E-05 | -0.46 | 2.75E-07 |
| HEXB    | 0.36  | 4.30E-05 | 0.21  | 2.80E-02 |

|          |       |          |       |          |
|----------|-------|----------|-------|----------|
| USP25    | 0.34  | 4.30E-05 | 0.41  | 3.32E-08 |
| UBE2A    | -0.34 | 4.32E-05 | -0.36 | 7.67E-07 |
| CAPZA1   | -0.30 | 4.33E-05 | -0.47 | 1.28E-11 |
| ZNF574   | -0.33 | 4.35E-05 | -0.28 | 3.56E-03 |
| NUP160   | -0.33 | 4.39E-05 | -0.40 | 1.36E-08 |
| TRIM3    | 0.39  | 4.39E-05 | 0.53  | 1.22E-08 |
| DAD1     | -0.39 | 4.41E-05 | -0.40 | 4.53E-07 |
| GNPTAB   | 0.31  | 4.47E-05 | 0.31  | 3.44E-05 |
| ADORA1   | -1.16 | 4.57E-05 | -0.68 | 6.23E-03 |
| ACOT8    | -0.37 | 4.58E-05 | -0.16 | 4.69E-02 |
| AGBL5    | -0.37 | 4.60E-05 | -0.32 | 2.92E-03 |
| KAT5     | 0.24  | 4.61E-05 | 0.34  | 4.27E-09 |
| MPZL2    | -0.68 | 4.70E-05 | -0.36 | 2.48E-02 |
| SPACA3   | -2.15 | 4.70E-05 | -1.18 | 6.49E-03 |
| APEH     | -0.30 | 4.76E-05 | -0.29 | 1.63E-04 |
| ZBTB7A   | 0.31  | 4.76E-05 | 0.26  | 8.86E-04 |
| MPV17L2  | -0.38 | 4.78E-05 | -0.33 | 1.05E-04 |
| APOBEC3D | -0.59 | 4.82E-05 | -0.56 | 4.60E-05 |
| UBA1     | -0.30 | 4.85E-05 | -0.41 | 1.68E-09 |
| CD19     | -1.24 | 4.91E-05 | -2.38 | 1.53E-11 |
| FOXG1    | -4.13 | 4.91E-05 | -1.95 | 5.80E-04 |
| ARPC3    | -0.38 | 5.04E-05 | -0.27 | 7.18E-04 |
| CCNDBP1  | 0.33  | 5.04E-05 | 0.34  | 4.88E-04 |
| ADAM33   | 0.94  | 5.13E-05 | 1.69  | 1.66E-16 |
| SSX2     | -4.47 | 5.15E-05 | -3.62 | 4.80E-13 |
| IL27RA   | -0.58 | 5.21E-05 | -0.46 | 3.05E-04 |
| RHOBTB3  | -0.64 | 5.24E-05 | -0.51 | 1.29E-03 |
| SEC23B   | -0.35 | 5.31E-05 | -0.36 | 9.94E-05 |
| PHC2     | -0.32 | 5.37E-05 | -0.45 | 2.63E-08 |
| XRCC1    | -0.32 | 5.46E-05 | -0.22 | 6.40E-03 |
| BCL7A    | -0.42 | 5.49E-05 | -0.29 | 1.69E-02 |
| IGFL3    | -3.01 | 5.53E-05 | -2.20 | 2.20E-05 |
| MYL12A   | 0.34  | 5.61E-05 | 0.32  | 1.94E-04 |
| IRAK4    | -0.30 | 5.63E-05 | -0.22 | 5.64E-03 |
| MMP16    | -1.07 | 5.72E-05 | -1.27 | 2.09E-06 |
| FUT1     | 0.53  | 5.83E-05 | 0.88  | 4.78E-13 |
| PKP4     | -0.35 | 5.88E-05 | -0.27 | 1.11E-03 |
| DMBT1    | 1.32  | 5.90E-05 | 2.11  | 3.92E-07 |
| KIF21A   | -0.57 | 5.95E-05 | -0.59 | 2.49E-05 |
| USP7     | -0.25 | 5.95E-05 | -0.30 | 3.67E-08 |
| MEF2C    | 0.50  | 6.02E-05 | 0.50  | 2.14E-05 |
| SAA4     | -1.81 | 6.15E-05 | -1.97 | 7.55E-04 |
| ST8SIA1  | 0.68  | 6.16E-05 | 0.86  | 1.18E-08 |

|          |       |          |       |          |
|----------|-------|----------|-------|----------|
| STK17B   | 0.39  | 6.17E-05 | 0.25  | 2.39E-02 |
| CDON     | 0.72  | 6.21E-05 | 1.36  | 5.42E-14 |
| NIPAL3   | 0.39  | 6.22E-05 | 0.55  | 3.24E-10 |
| P2RX5    | -0.78 | 6.23E-05 | -0.74 | 1.55E-05 |
| TRIM71   | 1.57  | 6.23E-05 | 3.44  | 1.77E-22 |
| MAP3K10  | -0.48 | 6.30E-05 | -0.39 | 4.66E-04 |
| NKX2-5   | -4.67 | 6.38E-05 | -2.15 | 2.39E-05 |
| SKIV2L2  | -0.31 | 6.48E-05 | -0.36 | 1.04E-06 |
| ZIC3     | -5.71 | 6.49E-05 | -1.60 | 8.87E-04 |
| HIVEP3   | 0.46  | 6.50E-05 | 0.31  | 1.42E-02 |
| RAP2C    | -0.32 | 6.50E-05 | -0.36 | 4.25E-07 |
| AKT2     | -0.30 | 6.51E-05 | -0.34 | 1.91E-06 |
| CDSN     | -1.10 | 6.61E-05 | -0.56 | 1.33E-02 |
| EIF2AK3  | -0.33 | 6.61E-05 | -0.30 | 3.79E-05 |
| CLOCK    | -0.47 | 6.73E-05 | -0.48 | 1.88E-07 |
| UBR4     | -0.32 | 6.74E-05 | -0.31 | 5.68E-05 |
| API5     | -0.25 | 6.91E-05 | -0.29 | 9.29E-06 |
| GRAP2    | 0.64  | 6.99E-05 | 0.96  | 2.56E-10 |
| NPHP1    | 0.52  | 6.99E-05 | 0.67  | 6.65E-05 |
| KPTN     | -0.48 | 7.08E-05 | -0.25 | 4.21E-02 |
| FGF13    | -0.91 | 7.11E-05 | -0.79 | 8.42E-05 |
| C21orf59 | -0.35 | 7.17E-05 | -0.26 | 2.49E-03 |
| GABPB2   | -0.43 | 7.19E-05 | -0.45 | 1.79E-04 |
| TCTN3    | -0.27 | 7.28E-05 | -0.44 | 1.10E-09 |
| JARID2   | -0.41 | 7.37E-05 | -0.33 | 7.46E-05 |
| NUCKS1   | -0.33 | 7.45E-05 | -0.45 | 1.25E-08 |
| SLC1A2   | 0.92  | 7.45E-05 | 1.48  | 7.59E-13 |
| MYO1D    | -0.47 | 7.52E-05 | -0.37 | 1.88E-04 |
| MECP2    | 0.27  | 7.55E-05 | 0.35  | 5.24E-06 |
| DPM1     | -0.36 | 7.60E-05 | -0.32 | 2.71E-04 |
| SLC23A1  | 1.06  | 7.70E-05 | 1.17  | 2.62E-03 |
| EPHA4    | -0.78 | 7.78E-05 | -0.49 | 2.01E-03 |
| HCLS1    | 0.49  | 7.80E-05 | 0.52  | 9.66E-05 |
| GBF1     | -0.29 | 7.86E-05 | -0.36 | 2.31E-06 |
| BLNK     | -0.55 | 7.97E-05 | -0.62 | 6.89E-06 |
| RARB     | 0.55  | 7.98E-05 | 0.30  | 3.55E-02 |
| FGL2     | 0.64  | 8.01E-05 | 0.65  | 8.86E-06 |
| UCP2     | -0.51 | 8.01E-05 | -0.31 | 2.74E-02 |
| SRA1     | -0.37 | 8.03E-05 | -0.42 | 2.76E-07 |
| HSP90AA1 | -0.38 | 8.06E-05 | -0.48 | 9.79E-09 |
| RASGRP1  | -0.66 | 8.12E-05 | -0.42 | 8.01E-03 |
| ESF1     | -0.38 | 8.15E-05 | -0.31 | 2.81E-04 |
| CPE      | -1.02 | 8.19E-05 | -0.47 | 2.57E-02 |

|           |       |          |       |          |
|-----------|-------|----------|-------|----------|
| ATG12     | -0.29 | 8.35E-05 | -0.36 | 9.75E-07 |
| CLEC4F    | 0.96  | 8.37E-05 | 1.63  | 2.90E-12 |
| HSD17B11  | 0.49  | 8.37E-05 | 0.76  | 5.35E-10 |
| YIPF5     | -0.28 | 8.41E-05 | -0.54 | 9.99E-15 |
| EMD       | -0.31 | 8.46E-05 | -0.20 | 1.85E-03 |
| RGS6      | 1.26  | 8.46E-05 | 2.70  | 4.15E-15 |
| RAB21     | 0.29  | 8.47E-05 | 0.24  | 6.63E-04 |
| CTSF      | 0.48  | 8.53E-05 | 0.44  | 6.54E-05 |
| MAT1A     | -1.41 | 8.55E-05 | -0.90 | 4.72E-03 |
| B9D2      | 0.42  | 8.60E-05 | 0.42  | 1.16E-03 |
| RB1       | 0.33  | 8.67E-05 | 0.25  | 2.07E-03 |
| TBK1      | -0.28 | 8.95E-05 | -0.22 | 2.09E-03 |
| CSNK1G2   | -0.31 | 9.00E-05 | -0.28 | 2.66E-05 |
| TRIM21    | 0.32  | 9.05E-05 | 0.41  | 8.17E-07 |
| IL15      | 0.55  | 9.09E-05 | 0.68  | 2.28E-06 |
| CREB3     | -0.33 | 9.25E-05 | -0.30 | 2.06E-04 |
| TBX19     | -0.50 | 9.34E-05 | -0.30 | 2.77E-02 |
| CCL26     | -1.38 | 9.43E-05 | -1.75 | 1.01E-06 |
| VDAC2     | -0.38 | 9.43E-05 | -0.44 | 3.13E-07 |
| PSIP1     | 0.39  | 9.55E-05 | 0.42  | 5.58E-05 |
| CLP1      | -0.27 | 9.69E-05 | -0.30 | 2.00E-05 |
| NGDN      | -0.36 | 9.71E-05 | -0.20 | 7.00E-03 |
| PLA2G2A   | 1.33  | 9.71E-05 | 1.13  | 4.49E-03 |
| ZNF644    | -0.29 | 9.78E-05 | -0.35 | 1.04E-07 |
| ALDH3B1   | 0.68  | 9.83E-05 | 1.37  | 2.05E-11 |
| GABARAPL2 | 0.33  | 9.84E-05 | 0.26  | 3.60E-03 |
| DYNC1LI1  | 0.23  | 9.98E-05 | 0.17  | 1.01E-02 |
| MYL6      | 0.40  | 9.99E-05 | 0.35  | 4.54E-05 |
| FBXL12    | 0.22  | 1.01E-04 | 0.36  | 2.69E-08 |
| TERF2     | -0.24 | 1.02E-04 | -0.37 | 1.12E-08 |
| FLNA      | 0.48  | 1.02E-04 | 0.40  | 7.97E-04 |
| RAET1L    | -2.59 | 1.04E-04 | -2.98 | 1.10E-08 |
| SEMA4D    | -0.37 | 1.04E-04 | -0.37 | 3.86E-06 |
| GSDMA     | -1.01 | 1.05E-04 | -0.75 | 8.48E-04 |
| ACP2      | -0.27 | 1.06E-04 | -0.45 | 3.52E-08 |
| TEP1      | -0.39 | 1.06E-04 | -0.36 | 9.21E-05 |
| PRKAA1    | -0.34 | 1.09E-04 | -0.24 | 6.41E-03 |
| NFAT5     | 0.35  | 1.10E-04 | 0.46  | 3.85E-08 |
| CD40LG    | 0.71  | 1.11E-04 | 0.55  | 6.00E-03 |
| UGT1A1    | -4.51 | 1.11E-04 | -2.24 | 5.90E-04 |
| MUT       | -0.32 | 1.12E-04 | -0.23 | 9.38E-04 |
| VLDLR     | 0.55  | 1.12E-04 | 0.57  | 1.55E-05 |
| SIGLEC12  | 0.98  | 1.13E-04 | 0.67  | 1.05E-03 |

|          |       |          |       |          |
|----------|-------|----------|-------|----------|
| NUP188   | -0.34 | 1.14E-04 | -0.30 | 2.19E-04 |
| APOA1    | 1.54  | 1.15E-04 | 3.17  | 1.32E-37 |
| TRIM32   | -0.26 | 1.16E-04 | -0.38 | 1.05E-06 |
| SOX3     | -3.32 | 1.16E-04 | -1.35 | 1.37E-02 |
| DUSP5    | -0.68 | 1.17E-04 | -0.64 | 7.92E-05 |
| RAB31    | 0.45  | 1.18E-04 | 0.32  | 5.98E-03 |
| RTN4R    | -0.59 | 1.19E-04 | -0.42 | 6.23E-04 |
| LPP      | -0.51 | 1.20E-04 | -0.56 | 1.25E-05 |
| NLRP5    | -6.06 | 1.20E-04 | -2.97 | 7.37E-11 |
| DPEP1    | -1.40 | 1.20E-04 | -2.70 | 2.92E-17 |
| ARHGAP26 | -0.65 | 1.20E-04 | -0.47 | 1.76E-03 |
| GADD45A  | -0.62 | 1.20E-04 | -0.63 | 6.33E-05 |
| GPX7     | -0.62 | 1.21E-04 | -0.80 | 3.24E-11 |
| GPSM3    | 0.44  | 1.23E-04 | 0.47  | 1.36E-04 |
| NDUFC2   | -0.36 | 1.23E-04 | -0.36 | 6.25E-06 |
| TMEM199  | -0.29 | 1.26E-04 | -0.26 | 3.79E-05 |
| BIRC6    | -0.31 | 1.28E-04 | -0.36 | 1.83E-07 |
| FAM19A2  | 0.79  | 1.29E-04 | 0.95  | 1.17E-07 |
| DGCR14   | -0.30 | 1.29E-04 | -0.14 | 4.93E-02 |
| ROCK1    | 0.31  | 1.29E-04 | 0.22  | 1.36E-03 |
| MAPK11   | 0.50  | 1.29E-04 | 0.44  | 2.51E-04 |
| MAP3K7   | -0.27 | 1.30E-04 | -0.42 | 2.16E-11 |
| HLA-DQB1 | 0.74  | 1.31E-04 | 1.05  | 2.24E-09 |
| NIPAL4   | -1.23 | 1.31E-04 | -1.64 | 2.05E-07 |
| BMPR1A   | 0.29  | 1.32E-04 | 0.20  | 1.42E-02 |
| ENPP4    | 0.42  | 1.36E-04 | 0.76  | 7.12E-10 |
| MMP28    | 1.01  | 1.37E-04 | 2.65  | 3.01E-21 |
| FAS      | 0.52  | 1.39E-04 | 0.35  | 1.28E-02 |
| IGSF8    | -0.45 | 1.41E-04 | -0.31 | 3.21E-03 |
| GRWD1    | -0.28 | 1.42E-04 | -0.33 | 2.99E-05 |
| HMOX2    | -0.35 | 1.44E-04 | -0.23 | 3.81E-03 |
| BTN3A2   | 0.45  | 1.44E-04 | 0.43  | 4.76E-06 |
| LAX1     | -0.82 | 1.45E-04 | -0.74 | 1.19E-04 |
| SP2      | 0.22  | 1.46E-04 | 0.16  | 8.84E-03 |
| IL1A     | 1.20  | 1.47E-04 | 2.25  | 9.00E-15 |
| CYP19A1  | -0.99 | 1.51E-04 | -0.69 | 2.97E-03 |
| L1CAM    | -1.47 | 1.51E-04 | -0.68 | 3.30E-02 |
| SYNGR1   | 0.64  | 1.53E-04 | 0.74  | 9.63E-06 |
| MBD4     | -0.27 | 1.54E-04 | -0.26 | 1.16E-04 |
| RPS6KA5  | 0.48  | 1.54E-04 | 0.60  | 3.03E-06 |
| MYSM1    | -0.51 | 1.55E-04 | -0.36 | 1.13E-02 |
| ZBTB32   | -0.71 | 1.55E-04 | -0.68 | 9.21E-05 |
| ERCC1    | -0.35 | 1.58E-04 | -0.36 | 2.75E-07 |



|          |       |          |       |          |
|----------|-------|----------|-------|----------|
| PDGFA    | 0.55  | 1.59E-04 | 0.66  | 1.84E-05 |
| WDR18    | -0.40 | 1.59E-04 | -0.36 | 1.37E-05 |
| SART1    | -0.32 | 1.63E-04 | -0.20 | 5.95E-03 |
| PSMD9    | -0.30 | 1.64E-04 | -0.20 | 9.54E-03 |
| NSFL1C   | -0.26 | 1.67E-04 | -0.22 | 3.49E-03 |
| PRPS1    | -0.30 | 1.67E-04 | -0.43 | 5.06E-11 |
| MAP3K2   | -0.32 | 1.67E-04 | -0.43 | 3.02E-09 |
| ATP6V0A1 | 0.33  | 1.68E-04 | 0.42  | 2.01E-07 |
| CNOT1    | -0.27 | 1.70E-04 | -0.38 | 1.30E-08 |
| PROM1    | -1.56 | 1.72E-04 | -0.86 | 4.87E-02 |
| AGL      | -0.47 | 1.76E-04 | -0.31 | 3.71E-04 |
| CTTNBP2  | 0.75  | 1.77E-04 | 0.93  | 7.73E-06 |
| FBXW7    | -0.35 | 1.77E-04 | -0.22 | 5.37E-03 |
| PTGS1    | 0.53  | 1.79E-04 | 0.41  | 4.32E-03 |
| LYN      | -0.39 | 1.82E-04 | -0.38 | 2.46E-05 |
| ZC3H12A  | 0.56  | 1.84E-04 | 0.39  | 4.69E-02 |
| RPL27A   | -0.49 | 1.84E-04 | -0.31 | 3.16E-03 |
| KIAA1109 | 0.38  | 1.84E-04 | 0.40  | 2.41E-06 |
| TAOK3    | 0.28  | 1.85E-04 | 0.26  | 2.23E-03 |
| H2AFY    | -0.27 | 1.86E-04 | -0.39 | 1.09E-08 |
| CYTIP    | 0.52  | 1.86E-04 | 0.39  | 1.09E-02 |
| ATP2B4   | 0.46  | 1.87E-04 | 0.44  | 2.02E-05 |
| KLHL7    | -0.36 | 1.87E-04 | -0.35 | 2.97E-04 |
| ABL2     | -0.33 | 1.87E-04 | -0.43 | 2.24E-06 |
| SERPINF1 | -0.66 | 1.88E-04 | -0.64 | 2.23E-04 |
| HDAC7    | 0.29  | 1.88E-04 | 0.41  | 6.29E-09 |
| IRF4     | -0.84 | 1.92E-04 | -0.61 | 5.19E-03 |
| HNRNPUL1 | -0.25 | 1.92E-04 | -0.32 | 5.54E-06 |
| TMEM173  | 0.46  | 1.93E-04 | 0.52  | 2.19E-07 |
| SRRM1    | -0.22 | 1.93E-04 | -0.24 | 8.21E-05 |
| SMC1A    | -0.35 | 1.95E-04 | -0.50 | 3.52E-12 |
| CCL19    | -1.01 | 1.97E-04 | -1.57 | 7.15E-09 |
| USMG5    | -0.44 | 1.98E-04 | -0.36 | 2.35E-04 |
| PRKCZ    | 0.54  | 1.98E-04 | 1.25  | 5.82E-22 |
| ZC3H12D  | -0.64 | 2.02E-04 | -0.70 | 1.69E-05 |
| MUL1     | 0.24  | 2.03E-04 | 0.12  | 3.28E-02 |
| AKNA     | 0.38  | 2.03E-04 | 0.35  | 4.93E-04 |
| DNAH1    | 0.63  | 2.09E-04 | 1.13  | 1.13E-08 |
| UBE2L3   | -0.27 | 2.09E-04 | -0.14 | 3.22E-02 |
| CD80     | 0.56  | 2.10E-04 | 0.55  | 5.26E-03 |
| MAOA     | 0.69  | 2.10E-04 | 1.46  | 1.79E-10 |
| PNMT     | 1.04  | 2.11E-04 | 2.28  | 9.90E-10 |
| HLA-DMA  | 0.53  | 2.12E-04 | 0.92  | 6.29E-09 |

|          |       |          |       |          |
|----------|-------|----------|-------|----------|
| SPON2    | -0.70 | 2.13E-04 | -0.46 | 1.10E-02 |
| POLA1    | -0.35 | 2.14E-04 | -0.53 | 7.91E-10 |
| CCL22    | -0.83 | 2.15E-04 | -0.94 | 1.67E-04 |
| SGMS1    | 0.45  | 2.17E-04 | 0.83  | 4.53E-19 |
| LYPLAL1  | -0.40 | 2.18E-04 | -0.26 | 1.80E-02 |
| CFLAR    | 0.37  | 2.18E-04 | 0.48  | 8.67E-07 |
| MIR155HG | -0.69 | 2.18E-04 | -0.51 | 5.36E-03 |
| LAMA3    | 0.88  | 2.20E-04 | 1.59  | 1.03E-08 |
| RPL18A   | -0.53 | 2.26E-04 | -0.29 | 1.13E-02 |
| ACSL3    | -0.38 | 2.26E-04 | -0.33 | 1.32E-04 |
| LIF      | -0.91 | 2.27E-04 | -0.83 | 2.78E-04 |
| PKIA     | 0.76  | 2.29E-04 | 0.90  | 1.24E-05 |
| ARHGEF2  | 0.40  | 2.31E-04 | 0.50  | 1.43E-08 |
| LTB      | -0.70 | 2.35E-04 | -0.81 | 6.86E-05 |
| IMPAD1   | -0.32 | 2.35E-04 | -0.29 | 7.16E-05 |
| OXGR1    | 1.27  | 2.37E-04 | 1.95  | 1.02E-07 |
| TGFB1    | 0.39  | 2.41E-04 | 0.40  | 2.87E-04 |
| CRH      | 2.71  | 2.42E-04 | 2.86  | 9.70E-13 |
| NR1H2    | 0.27  | 2.45E-04 | 0.41  | 1.07E-08 |
| TNRC6A   | -0.31 | 2.45E-04 | -0.22 | 8.77E-03 |
| EEA1     | 0.28  | 2.45E-04 | 0.28  | 6.19E-05 |
| ITPKB    | 0.44  | 2.48E-04 | 0.63  | 5.41E-12 |
| ALDH1L1  | -1.40 | 2.48E-04 | -1.02 | 5.58E-03 |
| PRKAG1   | -0.30 | 2.48E-04 | -0.28 | 6.18E-05 |
| UBA7     | 0.39  | 2.49E-04 | 0.66  | 1.67E-12 |
| GPNMB    | 0.60  | 2.52E-04 | 0.47  | 1.50E-02 |
| ICAM1    | 0.61  | 2.59E-04 | 0.88  | 4.29E-05 |
| MEX3C    | -0.28 | 2.60E-04 | -0.36 | 9.22E-06 |
| IMPDH1   | -0.46 | 2.69E-04 | -0.33 | 2.08E-03 |
| CUL3     | -0.21 | 2.70E-04 | -0.17 | 1.14E-03 |
| IGFBP5   | -0.75 | 2.73E-04 | -0.66 | 8.03E-04 |
| ITGA4    | 0.48  | 2.74E-04 | 0.31  | 1.89E-02 |
| RNF7     | -0.34 | 2.76E-04 | -0.30 | 2.11E-05 |
| GLE1     | -0.26 | 2.82E-04 | -0.25 | 3.72E-04 |
| REG1A    | -7.05 | 2.82E-04 | -2.33 | 8.26E-04 |
| MYLIP    | 0.39  | 2.83E-04 | 0.66  | 1.12E-08 |
| TMX1     | -0.34 | 2.83E-04 | -0.37 | 3.60E-06 |
| HMSD     | 0.89  | 2.84E-04 | 1.42  | 8.06E-06 |
| ASH1L    | -0.36 | 2.85E-04 | -0.36 | 1.42E-04 |
| CYTL1    | 0.90  | 2.87E-04 | 0.68  | 3.39E-03 |
| RNF41    | 0.27  | 2.90E-04 | 0.16  | 1.68E-02 |
| IFT172   | 0.41  | 2.93E-04 | 0.48  | 2.41E-04 |
| DOCK7    | -0.32 | 2.97E-04 | -0.57 | 2.91E-14 |

|           |       |          |       |          |
|-----------|-------|----------|-------|----------|
| RFXAP     | 0.31  | 2.99E-04 | 0.50  | 1.73E-07 |
| GABPA     | 0.24  | 3.03E-04 | 0.20  | 4.70E-04 |
| FBN2      | -1.55 | 3.14E-04 | -1.09 | 3.14E-05 |
| RPL24     | -0.50 | 3.14E-04 | -0.23 | 3.62E-02 |
| SLC25A5   | -0.38 | 3.14E-04 | -0.37 | 2.84E-05 |
| LILRA2    | 0.94  | 3.14E-04 | 1.67  | 1.17E-28 |
| SPNS2     | 0.67  | 3.19E-04 | 1.21  | 6.44E-12 |
| MMP23B    | 0.59  | 3.19E-04 | 0.82  | 3.30E-09 |
| CUL4A     | -0.53 | 3.25E-04 | -0.25 | 3.24E-04 |
| BSG       | -0.34 | 3.29E-04 | -0.23 | 3.01E-03 |
| TNFRSF13C | -0.93 | 3.31E-04 | -1.91 | 1.27E-09 |
| RPS10     | -0.55 | 3.38E-04 | -0.39 | 7.62E-04 |
| PSMB8     | -0.46 | 3.41E-04 | -0.29 | 1.23E-03 |
| SVIP      | -0.32 | 3.45E-04 | -0.38 | 5.53E-04 |
| NIPBL     | -0.37 | 3.46E-04 | -0.27 | 9.10E-04 |
| ITGB5     | -0.38 | 3.48E-04 | -0.54 | 7.42E-08 |
| RNASE2    | -0.77 | 3.51E-04 | -1.07 | 6.03E-08 |
| EIF4E     | -0.30 | 3.60E-04 | -0.38 | 1.30E-05 |
| CDC27     | -0.23 | 3.60E-04 | -0.45 | 8.36E-12 |
| MYOZ2     | 1.07  | 3.62E-04 | 1.78  | 1.41E-06 |
| TNF       | 0.72  | 3.62E-04 | 0.96  | 1.57E-04 |
| CD274     | 0.74  | 3.65E-04 | 0.84  | 4.24E-04 |
| TGFBI     | -0.78 | 3.65E-04 | -0.77 | 5.20E-05 |
| UBE2B     | 0.27  | 3.68E-04 | 0.25  | 1.73E-03 |
| SDC4      | 0.42  | 3.69E-04 | 0.54  | 1.73E-04 |
| CORT      | -0.68 | 3.74E-04 | -0.47 | 3.07E-02 |
| GNA12     | -0.33 | 3.77E-04 | -0.49 | 2.45E-10 |
| UBE2G1    | -0.24 | 3.81E-04 | -0.25 | 2.61E-05 |
| MPO       | 0.67  | 3.81E-04 | 0.40  | 4.27E-02 |
| EPHB6     | 0.84  | 3.83E-04 | 1.56  | 1.04E-21 |
| MGA       | -0.32 | 3.87E-04 | -0.21 | 6.22E-03 |
| TNFRSF8   | 0.65  | 3.88E-04 | 0.71  | 6.11E-06 |
| ATP11C    | -0.39 | 3.90E-04 | -0.49 | 6.13E-06 |
| PDGFC     | -0.47 | 3.90E-04 | -0.60 | 2.41E-07 |
| FCRL6     | 0.72  | 3.91E-04 | 1.23  | 1.85E-11 |
| PLEKHM2   | 0.22  | 3.92E-04 | 0.16  | 1.29E-02 |
| RPS19BP1  | -0.37 | 3.96E-04 | -0.19 | 3.71E-02 |
| RNF135    | -0.30 | 3.99E-04 | -0.20 | 2.04E-02 |
| BCOR      | -0.36 | 4.04E-04 | -0.30 | 5.40E-04 |
| VAPB      | -0.31 | 4.04E-04 | -0.22 | 1.09E-03 |
| SP100     | 0.27  | 4.06E-04 | 0.29  | 4.05E-05 |
| RAD50     | -0.29 | 4.08E-04 | -0.43 | 1.58E-11 |
| IFIT5     | 0.35  | 4.09E-04 | 0.35  | 1.14E-04 |

|         |       |          |       |          |
|---------|-------|----------|-------|----------|
| PHLPP2  | 0.35  | 4.17E-04 | 0.35  | 1.92E-03 |
| FCRLA   | -1.00 | 4.18E-04 | -2.14 | 4.07E-15 |
| TRAPPC9 | -0.37 | 4.19E-04 | -0.36 | 1.99E-04 |
| CD1A    | -1.33 | 4.23E-04 | -0.91 | 9.79E-03 |
| RFTN1   | 0.50  | 4.23E-04 | 0.83  | 2.51E-10 |
| TOLLIP  | 0.25  | 4.25E-04 | 0.38  | 2.26E-09 |
| RIPK2   | -0.41 | 4.31E-04 | -0.37 | 3.43E-03 |
| ZNF426  | 0.36  | 4.33E-04 | 0.21  | 3.76E-02 |
| CXCL10  | -0.91 | 4.37E-04 | -0.84 | 3.50E-03 |
| SLC2A10 | -0.71 | 4.40E-04 | -0.60 | 1.24E-03 |
| ATP8A1  | 0.61  | 4.42E-04 | 1.51  | 2.08E-16 |
| ZNF346  | -0.26 | 4.49E-04 | -0.24 | 1.88E-03 |
| MAPK8   | -0.33 | 4.52E-04 | -0.43 | 1.34E-07 |
| CNTN2   | -1.32 | 4.53E-04 | -0.85 | 2.34E-02 |
| ABCB7   | -0.25 | 4.57E-04 | -0.32 | 3.92E-06 |
| NCOA3   | -0.31 | 4.67E-04 | -0.36 | 2.50E-06 |
| VPREB3  | -0.96 | 4.68E-04 | -2.48 | 4.87E-16 |
| ATF2    | -0.30 | 4.72E-04 | -0.40 | 1.41E-08 |
| IL21R   | -0.61 | 4.72E-04 | -0.75 | 3.34E-06 |
| CLPTM1  | -0.25 | 4.73E-04 | -0.35 | 2.11E-05 |
| IBTK    | -0.27 | 4.73E-04 | -0.26 | 1.55E-03 |
| MCM3AP  | -0.24 | 4.78E-04 | -0.18 | 8.26E-04 |
| FOXC2   | 0.77  | 4.87E-04 | 1.01  | 4.19E-06 |
| RPSA    | -0.48 | 4.89E-04 | -0.31 | 3.90E-03 |
| CTAG1B  | -5.66 | 4.90E-04 | -1.91 | 3.72E-04 |
| CD247   | 0.54  | 4.90E-04 | 0.65  | 9.48E-05 |
| PPARA   | -0.33 | 4.97E-04 | -0.25 | 2.99E-03 |
| GPR132  | -0.52 | 4.99E-04 | -0.65 | 6.08E-06 |
| ARSA    | -0.42 | 5.02E-04 | -0.29 | 2.64E-03 |
| MAN2B1  | 0.28  | 5.06E-04 | 0.23  | 1.24E-02 |
| FLT3LG  | 0.42  | 5.13E-04 | 0.54  | 1.11E-06 |
| DHX36   | -0.28 | 5.14E-04 | -0.33 | 5.23E-06 |
| DUSP10  | -0.47 | 5.16E-04 | -0.43 | 9.89E-04 |
| CACNA1A | -1.26 | 5.17E-04 | -0.55 | 1.86E-02 |
| DLG4    | 0.41  | 5.19E-04 | 0.50  | 5.99E-06 |
| KLF12   | 0.44  | 5.27E-04 | 0.26  | 4.11E-02 |
| TMEM37  | 0.60  | 5.28E-04 | 1.09  | 1.46E-11 |
| MAP2K2  | -0.27 | 5.29E-04 | -0.28 | 5.23E-06 |
| PURA    | 0.29  | 5.42E-04 | 0.29  | 1.36E-04 |
| PIP5K1C | 0.26  | 5.44E-04 | 0.18  | 1.92E-02 |
| POLK    | 0.27  | 5.48E-04 | 0.16  | 3.71E-02 |
| FKBP1A  | 0.23  | 5.48E-04 | 0.22  | 6.74E-04 |
| NDUFA1  | -0.37 | 5.51E-04 | -0.29 | 3.68E-04 |

|           |       |          |       |          |
|-----------|-------|----------|-------|----------|
| NID2      | -0.63 | 5.55E-04 | -0.92 | 3.40E-06 |
| RASD2     | -0.69 | 5.73E-04 | -0.49 | 2.64E-02 |
| IRGQ      | -0.32 | 5.74E-04 | -0.24 | 6.08E-03 |
| LAMC2     | -0.79 | 5.77E-04 | -0.60 | 8.21E-03 |
| MT2A      | 0.67  | 5.77E-04 | 0.47  | 9.76E-03 |
| PARL      | -0.31 | 5.77E-04 | -0.26 | 5.22E-05 |
| WRN       | -0.32 | 5.82E-04 | -0.35 | 1.81E-04 |
| MASP2     | 0.57  | 5.86E-04 | 1.20  | 5.16E-11 |
| CCNA1     | 1.09  | 5.86E-04 | 1.68  | 1.66E-05 |
| ITFG2     | 0.30  | 5.89E-04 | 0.44  | 1.67E-07 |
| AFF1      | 0.29  | 6.03E-04 | 0.27  | 3.35E-04 |
| PSMB6     | -0.35 | 6.08E-04 | -0.26 | 1.31E-03 |
| NUP54     | -0.28 | 6.11E-04 | -0.31 | 1.19E-05 |
| PGLS      | -0.37 | 6.15E-04 | -0.25 | 6.30E-03 |
| TLR6      | -0.53 | 6.27E-04 | -0.79 | 1.87E-08 |
| GDAP1     | -0.56 | 6.27E-04 | -0.37 | 8.04E-03 |
| CCND3     | 0.44  | 6.31E-04 | 0.80  | 1.28E-12 |
| TNFSF10   | 0.58  | 6.36E-04 | 0.72  | 7.03E-05 |
| LRP5      | -0.39 | 6.37E-04 | -0.22 | 4.54E-02 |
| SCG2      | -1.42 | 6.44E-04 | -0.58 | 3.96E-02 |
| RPS17     | -0.46 | 6.46E-04 | -0.33 | 5.48E-03 |
| TNFRSF12A | -0.62 | 6.50E-04 | -0.64 | 8.49E-04 |
| DGKZ      | -0.29 | 6.52E-04 | -0.32 | 4.09E-05 |
| EXOC4     | -0.23 | 6.60E-04 | -0.38 | 3.69E-09 |
| CSTB      | -0.46 | 6.63E-04 | -0.32 | 2.17E-02 |
| SLC39A3   | -0.28 | 6.63E-04 | -0.39 | 5.87E-09 |
| LRRC17    | -0.67 | 6.79E-04 | -0.53 | 3.30E-03 |
| ACTC1     | 0.92  | 6.83E-04 | 1.02  | 1.74E-03 |
| NR4A2     | 0.71  | 6.88E-04 | 1.02  | 1.73E-07 |
| MAGT1     | -0.30 | 6.88E-04 | -0.30 | 3.39E-04 |
| PLA2G2D   | -1.01 | 6.89E-04 | -1.35 | 2.86E-05 |
| CEP57     | -0.24 | 7.02E-04 | -0.25 | 1.38E-03 |
| RTN4      | 0.25  | 7.03E-04 | 0.21  | 3.37E-03 |
| BAX       | -0.29 | 7.05E-04 | -0.26 | 5.97E-04 |
| SSX1      | -5.70 | 7.06E-04 | -1.30 | 4.61E-03 |
| ROS1      | 0.81  | 7.08E-04 | 1.39  | 2.09E-06 |
| ANO5      | 0.76  | 7.22E-04 | 1.53  | 2.00E-13 |
| UPF1      | -0.29 | 7.26E-04 | -0.19 | 1.94E-02 |
| KPNA1     | -0.25 | 7.27E-04 | -0.32 | 1.10E-09 |
| PLCB2     | 0.49  | 7.35E-04 | 0.87  | 1.08E-08 |
| RCHY1     | 0.27  | 7.47E-04 | 0.27  | 1.69E-03 |
| PER3      | 0.54  | 7.53E-04 | 0.58  | 8.34E-05 |
| MAP1LC3B  | 0.25  | 7.60E-04 | 0.18  | 2.05E-02 |

|          |       |          |       |          |
|----------|-------|----------|-------|----------|
| TNIK     | 0.61  | 7.65E-04 | 1.03  | 1.45E-08 |
| CSF1     | 0.50  | 7.69E-04 | 0.46  | 5.00E-03 |
| EPHB4    | -0.41 | 7.69E-04 | -0.40 | 1.31E-03 |
| SLC9A1   | 0.33  | 7.71E-04 | 0.24  | 4.32E-02 |
| MTAP     | -0.47 | 7.73E-04 | -0.41 | 4.09E-04 |
| LINS1    | -0.26 | 7.75E-04 | -0.19 | 1.55E-02 |
| ADIPOR1  | -0.25 | 7.87E-04 | -0.25 | 1.55E-03 |
| DUSP22   | 0.27  | 7.88E-04 | 0.39  | 3.83E-07 |
| LIG4     | 0.32  | 7.96E-04 | 0.41  | 2.28E-05 |
| DSTN     | 0.34  | 8.09E-04 | 0.50  | 1.49E-05 |
| GPC6     | -0.75 | 8.09E-04 | -1.10 | 2.79E-05 |
| PLCD3    | 0.56  | 8.10E-04 | 0.62  | 1.20E-04 |
| TNFSF15  | -0.72 | 8.10E-04 | -0.49 | 1.08E-02 |
| TREML2   | 0.75  | 8.20E-04 | 0.38  | 3.34E-02 |
| ASB3     | -0.27 | 8.25E-04 | -0.19 | 1.05E-02 |
| GNAO1    | -0.69 | 8.31E-04 | -0.42 | 4.72E-02 |
| MRAP2    | 0.93  | 8.40E-04 | 1.67  | 2.27E-09 |
| CEBPA    | 0.65  | 8.41E-04 | 1.36  | 9.41E-14 |
| EHMT1    | -0.25 | 8.53E-04 | -0.18 | 1.07E-02 |
| PEX26    | -0.27 | 8.53E-04 | -0.34 | 1.45E-05 |
| RPL35A   | -0.42 | 8.58E-04 | -0.30 | 3.70E-03 |
| UTS2     | -1.49 | 8.80E-04 | -1.07 | 1.62E-03 |
| PPP1R12B | 0.45  | 8.96E-04 | 0.89  | 3.96E-14 |
| BRI3     | 0.37  | 9.19E-04 | 0.52  | 3.65E-10 |
| AFG3L2   | -0.27 | 9.33E-04 | -0.21 | 2.46E-03 |
| PDGFD    | -0.60 | 9.33E-04 | -0.75 | 5.90E-05 |
| CAMKK2   | 0.18  | 9.49E-04 | 0.22  | 2.97E-03 |
| ZFP36L1  | -0.40 | 9.55E-04 | -0.27 | 2.28E-02 |
| SLC4A2   | -0.30 | 9.66E-04 | -0.18 | 2.14E-02 |
| C10orf11 | 0.45  | 9.68E-04 | 0.44  | 3.40E-04 |
| SMPD1    | 0.28  | 9.70E-04 | 0.27  | 3.81E-03 |
| SERPINI2 | 1.06  | 9.77E-04 | 1.84  | 1.61E-06 |
| RPLP2    | -0.37 | 9.80E-04 | -0.24 | 8.54E-03 |
| EDIL3    | 0.70  | 9.88E-04 | 0.55  | 1.36E-02 |
| DLL1     | 0.61  | 1.00E-03 | 1.08  | 3.20E-07 |
| PDXK     | 0.32  | 1.01E-03 | 0.57  | 3.73E-10 |
| SEN3     | -0.25 | 1.02E-03 | -0.15 | 2.69E-02 |
| BGN      | -0.48 | 1.02E-03 | -0.71 | 4.16E-05 |
| HSPH1    | -0.35 | 1.03E-03 | -0.37 | 1.62E-04 |
| TAGLN2   | -0.37 | 1.05E-03 | -0.32 | 2.83E-03 |
| NRG2     | 0.82  | 1.08E-03 | 1.40  | 1.99E-09 |
| ICAM4    | 0.78  | 1.08E-03 | 1.95  | 1.09E-09 |
| RAB8A    | 0.18  | 1.11E-03 | 0.13  | 2.50E-02 |

|         |       |          |       |          |
|---------|-------|----------|-------|----------|
| KDR     | 0.57  | 1.12E-03 | 0.95  | 4.02E-10 |
| FAM20C  | -0.46 | 1.12E-03 | -0.70 | 2.29E-09 |
| IL19    | -2.30 | 1.12E-03 | -1.87 | 1.40E-04 |
| SYP     | 0.78  | 1.12E-03 | 1.80  | 1.88E-20 |
| ARHGEF5 | -0.34 | 1.13E-03 | -0.24 | 2.37E-02 |
| POLDIP3 | 0.20  | 1.14E-03 | 0.25  | 1.50E-05 |
| BAG3    | -0.35 | 1.15E-03 | -0.33 | 9.46E-03 |
| C1QTNF3 | -0.84 | 1.17E-03 | -0.64 | 8.57E-03 |
| TRPS1   | -0.49 | 1.17E-03 | -0.75 | 7.10E-07 |
| DOLK    | -0.23 | 1.18E-03 | -0.22 | 2.28E-03 |
| PIGN    | -0.28 | 1.19E-03 | -0.39 | 4.62E-06 |
| PRKCD   | 0.27  | 1.20E-03 | 0.46  | 8.17E-07 |
| PIGV    | -0.29 | 1.20E-03 | -0.25 | 7.28E-03 |
| DCTN3   | 0.29  | 1.22E-03 | 0.27  | 4.87E-04 |
| DHRS4   | 0.29  | 1.24E-03 | 0.38  | 1.47E-07 |
| RPS3    | -0.47 | 1.24E-03 | -0.30 | 2.97E-03 |
| CEP164  | -0.31 | 1.25E-03 | -0.18 | 4.95E-02 |
| RPS26   | -0.52 | 1.26E-03 | -0.51 | 1.09E-05 |
| MAML1   | -0.24 | 1.26E-03 | -0.31 | 1.86E-06 |
| NMI     | -0.33 | 1.27E-03 | -0.32 | 2.91E-04 |
| PDCD10  | -0.35 | 1.28E-03 | -0.27 | 6.38E-03 |
| FAM83G  | -0.46 | 1.29E-03 | -0.45 | 4.65E-03 |
| KLHL9   | 0.31  | 1.31E-03 | 0.24  | 2.34E-03 |
| PLEKHA3 | -0.20 | 1.31E-03 | -0.22 | 2.73E-04 |
| ABCD1   | -0.35 | 1.31E-03 | -0.32 | 8.72E-04 |
| FCER1A  | 0.88  | 1.32E-03 | 1.98  | 1.23E-11 |
| DPYD    | 0.47  | 1.32E-03 | 0.57  | 2.65E-05 |
| HS2ST1  | -0.33 | 1.34E-03 | -0.47 | 1.03E-08 |
| GTPBP1  | 0.23  | 1.36E-03 | 0.24  | 7.77E-04 |
| NFKB2   | -0.33 | 1.37E-03 | -0.30 | 7.70E-03 |
| PIAS4   | -0.24 | 1.38E-03 | -0.26 | 4.31E-04 |
| TLR2    | 0.52  | 1.40E-03 | 0.70  | 4.67E-06 |
| TBRG1   | 0.20  | 1.40E-03 | 0.38  | 1.32E-09 |
| ARF3    | -0.20 | 1.41E-03 | -0.19 | 1.99E-02 |
| IRF2BP2 | -0.24 | 1.43E-03 | -0.18 | 3.59E-02 |
| IL24    | -0.94 | 1.44E-03 | -0.76 | 2.21E-03 |
| PLEC    | -0.47 | 1.44E-03 | -0.44 | 1.39E-03 |
| CDC26   | -0.28 | 1.45E-03 | -0.33 | 5.06E-05 |
| BRWD1   | -0.25 | 1.46E-03 | -0.14 | 3.13E-02 |
| IFT27   | -0.36 | 1.47E-03 | -0.28 | 1.97E-02 |
| SOX1    | -3.42 | 1.51E-03 | -1.42 | 1.86E-02 |
| SSBP2   | 0.40  | 1.53E-03 | 0.59  | 5.12E-07 |
| TGM3    | 1.06  | 1.55E-03 | 1.44  | 3.53E-03 |

|          |       |          |       |          |
|----------|-------|----------|-------|----------|
| PTCHD1   | 0.93  | 1.57E-03 | 2.34  | 1.97E-11 |
| SPAG1    | -0.46 | 1.57E-03 | -0.32 | 2.86E-02 |
| ALDH7A1  | -0.33 | 1.59E-03 | -0.46 | 3.80E-08 |
| DZIP3    | 0.35  | 1.63E-03 | 0.32  | 1.10E-02 |
| HSPA1L   | 0.29  | 1.68E-03 | 0.38  | 2.06E-04 |
| FUCA2    | -0.29 | 1.70E-03 | -0.43 | 2.32E-07 |
| BID      | -0.39 | 1.71E-03 | -0.35 | 1.00E-03 |
| IKZF3    | -0.64 | 1.74E-03 | -0.75 | 2.08E-05 |
| DDX24    | 0.19  | 1.75E-03 | 0.16  | 1.30E-02 |
| TRIM8    | -0.32 | 1.76E-03 | -0.25 | 7.57E-03 |
| FAM26F   | -0.70 | 1.76E-03 | -0.61 | 1.45E-03 |
| ITGA1    | 0.45  | 1.77E-03 | 0.45  | 2.67E-03 |
| MTHFR    | 0.33  | 1.77E-03 | 0.74  | 2.17E-13 |
| NCR1     | 0.84  | 1.77E-03 | 0.85  | 3.72E-03 |
| DCTN6    | 0.27  | 1.77E-03 | 0.29  | 1.69E-03 |
| DHX29    | -0.27 | 1.77E-03 | -0.34 | 9.56E-06 |
| IL7      | 0.47  | 1.77E-03 | 0.44  | 4.78E-03 |
| WEE1     | -0.37 | 1.80E-03 | -0.37 | 3.70E-03 |
| ROR2     | -0.56 | 1.81E-03 | -0.85 | 3.36E-07 |
| ZNF592   | 0.24  | 1.84E-03 | 0.27  | 1.52E-03 |
| PRKAR1B  | 0.40  | 1.85E-03 | 0.42  | 1.04E-03 |
| IFT122   | 0.26  | 1.85E-03 | 0.26  | 4.67E-03 |
| EIF2B3   | -0.24 | 1.87E-03 | -0.33 | 5.86E-05 |
| MAPKAPK2 | -0.21 | 1.88E-03 | -0.26 | 1.59E-04 |
| RAB5B    | 0.20  | 1.89E-03 | 0.24  | 8.14E-05 |
| SEMA5B   | -0.79 | 1.90E-03 | -0.56 | 4.40E-02 |
| BDKRB2   | -0.62 | 1.96E-03 | -0.52 | 4.91E-03 |
| PRSS12   | 0.82  | 1.97E-03 | 2.02  | 3.79E-12 |
| ITFG1    | -0.25 | 1.97E-03 | -0.31 | 1.04E-05 |
| ABCC1    | -0.37 | 1.99E-03 | -0.33 | 8.70E-04 |
| CTNNB1   | -0.29 | 1.99E-03 | -0.36 | 7.80E-05 |
| STT3B    | -0.26 | 2.00E-03 | -0.39 | 9.87E-07 |
| AP2S1    | -0.29 | 2.01E-03 | -0.44 | 1.01E-08 |
| CYP4F22  | 0.71  | 2.01E-03 | 1.19  | 3.64E-07 |
| A4GNT    | 0.90  | 2.01E-03 | 1.23  | 9.09E-05 |
| UBB      | 0.25  | 2.02E-03 | 0.22  | 4.22E-03 |
| CEBPD    | 0.48  | 2.02E-03 | 0.88  | 5.38E-08 |
| DSCR4    | -5.32 | 2.03E-03 | -2.38 | 3.68E-08 |
| PPT1     | 0.29  | 2.03E-03 | 0.19  | 2.89E-02 |
| VTN      | 1.30  | 2.05E-03 | 2.07  | 2.17E-17 |
| TSG101   | -0.21 | 2.06E-03 | -0.17 | 2.64E-02 |
| UBA5     | -0.20 | 2.06E-03 | -0.17 | 1.32E-02 |
| FXR2     | 0.23  | 2.07E-03 | 0.36  | 6.31E-07 |



|           |       |          |       |          |
|-----------|-------|----------|-------|----------|
| NRIP1     | -0.36 | 2.08E-03 | -0.39 | 3.52E-04 |
| TCAP      | 0.59  | 2.09E-03 | 1.46  | 1.14E-15 |
| SNURF     | 0.61  | 2.11E-03 | 0.54  | 1.24E-02 |
| TPP2      | -0.24 | 2.15E-03 | -0.22 | 2.50E-03 |
| RNF19B    | -0.27 | 2.17E-03 | -0.22 | 1.65E-03 |
| RFX4      | 1.30  | 2.19E-03 | 1.92  | 2.76E-06 |
| SPATA2    | -0.24 | 2.21E-03 | -0.15 | 3.48E-02 |
| AGGF1     | -0.19 | 2.22E-03 | -0.33 | 6.56E-08 |
| RGS1      | -0.62 | 2.23E-03 | -0.65 | 3.94E-04 |
| NCOA5     | -0.20 | 2.25E-03 | -0.24 | 2.24E-04 |
| ARF6      | -0.22 | 2.26E-03 | -0.24 | 3.85E-04 |
| SLFN12L   | -0.53 | 2.27E-03 | -0.42 | 6.42E-03 |
| ELN       | 0.59  | 2.33E-03 | 0.79  | 3.44E-04 |
| MED23     | -0.21 | 2.34E-03 | -0.28 | 4.01E-04 |
| SPRED1    | 0.32  | 2.37E-03 | 0.34  | 1.13E-03 |
| SCNN1G    | 0.74  | 2.38E-03 | 2.21  | 1.52E-17 |
| EIF2S1    | -0.26 | 2.42E-03 | -0.40 | 3.76E-08 |
| GPKOW     | -0.26 | 2.45E-03 | -0.28 | 1.51E-06 |
| CRIP1     | 0.52  | 2.46E-03 | 0.87  | 7.61E-06 |
| POU2F1    | -0.42 | 2.48E-03 | -0.47 | 3.09E-05 |
| CSNK1G1   | -0.24 | 2.52E-03 | -0.30 | 7.51E-05 |
| TNFRSF10C | -0.54 | 2.53E-03 | -0.44 | 3.99E-02 |
| HNRNPH1   | -0.23 | 2.53E-03 | -0.18 | 1.21E-02 |
| KLHL3     | 0.40  | 2.54E-03 | 0.37  | 1.57E-02 |
| AR        | 0.73  | 2.54E-03 | 0.97  | 2.23E-05 |
| NQO2      | -0.40 | 2.56E-03 | -0.30 | 2.06E-03 |
| DCTN2     | -0.23 | 2.56E-03 | -0.26 | 1.37E-03 |
| SMURF2    | -0.36 | 2.58E-03 | -0.29 | 2.06E-02 |
| PTN       | 0.73  | 2.58E-03 | 1.76  | 3.52E-10 |
| ARPC1B    | -0.33 | 2.59E-03 | -0.30 | 1.08E-03 |
| MMAB      | 0.30  | 2.59E-03 | 0.56  | 7.55E-09 |
| BTN1A1    | -0.88 | 2.59E-03 | -1.57 | 2.62E-07 |
| SDHB      | -0.25 | 2.60E-03 | -0.25 | 1.66E-04 |
| CBL       | 0.29  | 2.65E-03 | 0.32  | 1.95E-04 |
| DNTTIP2   | -0.24 | 2.66E-03 | -0.31 | 2.78E-05 |
| CTCF      | -0.16 | 2.68E-03 | -0.28 | 4.79E-07 |
| ACAA1     | 0.27  | 2.68E-03 | 0.44  | 2.78E-06 |
| INSR      | -0.38 | 2.68E-03 | -0.26 | 1.99E-02 |
| TNNT2     | 0.81  | 2.69E-03 | 2.81  | 2.92E-30 |
| BCL7B     | 0.22  | 2.70E-03 | 0.16  | 4.10E-02 |
| SLC23A2   | 0.32  | 2.70E-03 | 0.41  | 9.35E-05 |
| FCRLB     | -0.52 | 2.70E-03 | -0.65 | 3.00E-04 |
| ATP4A     | -2.80 | 2.71E-03 | -1.56 | 5.63E-04 |

|          |       |          |       |          |
|----------|-------|----------|-------|----------|
| RPL17    | -0.41 | 2.73E-03 | -0.30 | 8.39E-03 |
| TAB3     | -0.23 | 2.76E-03 | -0.29 | 6.91E-05 |
| CD40     | 0.41  | 2.79E-03 | 0.41  | 2.43E-03 |
| MEPE     | -1.51 | 2.80E-03 | -1.64 | 3.22E-03 |
| GHITM    | -0.28 | 2.81E-03 | -0.28 | 1.29E-03 |
| HOXA7    | 0.60  | 2.81E-03 | 0.68  | 1.63E-03 |
| RNF126   | -0.27 | 2.83E-03 | -0.24 | 6.21E-03 |
| GRP      | 1.20  | 2.84E-03 | 1.46  | 6.75E-04 |
| TINAGL1  | 0.49  | 2.89E-03 | 0.84  | 3.97E-07 |
| LRIG1    | 0.36  | 2.90E-03 | 0.57  | 1.87E-08 |
| HRH3     | -2.83 | 2.97E-03 | -1.14 | 7.70E-03 |
| RAB17    | 0.38  | 3.00E-03 | 0.92  | 8.31E-18 |
| DUSP14   | -0.34 | 3.06E-03 | -0.32 | 9.43E-03 |
| ANKHD1   | -0.26 | 3.11E-03 | -0.25 | 4.50E-04 |
| BPGM     | -0.35 | 3.11E-03 | -0.34 | 1.90E-03 |
| NDUFA13  | -0.37 | 3.13E-03 | -0.26 | 6.54E-03 |
| CD1C     | 0.66  | 3.14E-03 | 1.22  | 1.37E-06 |
| DPCD     | -0.34 | 3.14E-03 | -0.50 | 9.05E-04 |
| HSPA8    | -0.26 | 3.19E-03 | -0.49 | 6.72E-08 |
| BCL6     | 0.29  | 3.19E-03 | 0.46  | 9.66E-07 |
| FES      | 0.32  | 3.25E-03 | 0.49  | 1.86E-09 |
| ARHGEF4  | 0.67  | 3.28E-03 | 1.33  | 2.13E-07 |
| UEVLD    | -0.24 | 3.29E-03 | -0.40 | 5.21E-06 |
| HACE1    | 0.28  | 3.36E-03 | 0.21  | 3.25E-02 |
| IFI16    | -0.43 | 3.38E-03 | -0.76 | 7.39E-07 |
| RPS27A   | -0.34 | 3.45E-03 | -0.24 | 1.91E-02 |
| CSNK1A1  | -0.21 | 3.45E-03 | -0.34 | 1.16E-07 |
| NRAS     | -0.27 | 3.46E-03 | -0.29 | 7.21E-04 |
| TBCB     | -0.32 | 3.46E-03 | -0.24 | 3.67E-03 |
| PTPN13   | 0.64  | 3.49E-03 | 1.56  | 2.44E-14 |
| RPA1     | -0.20 | 3.50E-03 | -0.26 | 3.48E-05 |
| JMJD6    | -0.24 | 3.53E-03 | -0.20 | 1.84E-02 |
| FOXJ2    | 0.22  | 3.58E-03 | 0.20  | 8.15E-03 |
| EDA      | 0.60  | 3.59E-03 | 1.20  | 2.12E-10 |
| HOMER1   | 0.36  | 3.61E-03 | 0.57  | 6.31E-05 |
| DIP2B    | -0.26 | 3.69E-03 | -0.28 | 6.64E-04 |
| OTUD4    | 0.20  | 3.70E-03 | 0.14  | 1.85E-02 |
| S100A7A  | -3.73 | 3.71E-03 | -1.45 | 5.91E-03 |
| FBXL4    | -0.21 | 3.71E-03 | -0.33 | 7.94E-06 |
| ADAMTSL2 | 0.45  | 3.74E-03 | 0.40  | 2.86E-02 |
| CD1D     | 0.40  | 3.80E-03 | 0.39  | 6.18E-03 |
| TERF1    | -0.24 | 3.83E-03 | -0.19 | 2.92E-03 |
| PDCD2    | -0.25 | 3.83E-03 | -0.36 | 1.59E-06 |

|         |       |          |       |          |
|---------|-------|----------|-------|----------|
| DNM2    | 0.20  | 3.86E-03 | 0.30  | 2.52E-05 |
| NTRK1   | 0.59  | 3.87E-03 | 0.70  | 2.21E-03 |
| BIVM    | 0.30  | 3.88E-03 | 0.34  | 1.45E-03 |
| IPO5    | -0.26 | 3.94E-03 | -0.29 | 6.50E-04 |
| ORAI3   | -0.30 | 3.97E-03 | -0.21 | 1.79E-02 |
| TDRD7   | 0.23  | 3.98E-03 | 0.19  | 2.52E-02 |
| TRIP11  | -0.26 | 4.05E-03 | -0.36 | 5.67E-07 |
| SUPT4H1 | -0.24 | 4.07E-03 | -0.30 | 7.88E-06 |
| RREB1   | -0.27 | 4.11E-03 | -0.29 | 7.52E-04 |
| FAH     | -0.35 | 4.15E-03 | -0.26 | 2.01E-02 |
| XRN2    | -0.22 | 4.16E-03 | -0.28 | 4.90E-04 |
| TACR1   | 0.74  | 4.17E-03 | 1.48  | 4.36E-09 |
| RARG    | -0.37 | 4.20E-03 | -0.31 | 2.30E-02 |
| XK      | -0.69 | 4.25E-03 | -0.49 | 3.37E-02 |
| CLEC2A  | -3.22 | 4.27E-03 | -0.98 | 1.87E-02 |
| ANKH    | -0.37 | 4.33E-03 | -0.44 | 1.32E-04 |
| PLVAP   | -0.41 | 4.39E-03 | -0.84 | 8.31E-06 |
| CRLS1   | 0.31  | 4.39E-03 | 0.59  | 3.39E-07 |
| PNP     | -0.36 | 4.42E-03 | -0.44 | 1.51E-03 |
| STX3    | 0.24  | 4.46E-03 | 0.42  | 1.12E-06 |
| PCNT    | -0.31 | 4.46E-03 | -0.17 | 4.13E-02 |
| NPHS1   | -1.25 | 4.52E-03 | -0.89 | 4.46E-02 |
| CTAG2   | -4.79 | 4.54E-03 | -1.96 | 6.10E-04 |
| FREM2   | 0.68  | 4.55E-03 | 2.00  | 5.82E-14 |
| PTPN12  | 0.19  | 4.57E-03 | 0.22  | 2.85E-03 |
| DUSP16  | 0.28  | 4.60E-03 | 0.41  | 2.49E-04 |
| NPAT    | -0.22 | 4.60E-03 | -0.33 | 1.32E-05 |
| SPSB4   | 0.72  | 4.60E-03 | 0.86  | 1.16E-04 |
| TNPO3   | -0.24 | 4.61E-03 | -0.37 | 9.04E-07 |
| ATOX1   | -0.27 | 4.71E-03 | -0.43 | 2.96E-07 |
| IGFBP1  | -1.87 | 4.75E-03 | -1.23 | 1.15E-02 |
| MIB1    | -0.26 | 4.78E-03 | -0.32 | 7.51E-05 |
| STX17   | 0.17  | 4.84E-03 | 0.18  | 4.63E-03 |
| RFK     | -0.35 | 4.89E-03 | -0.46 | 2.06E-04 |
| LAMC1   | -0.32 | 4.93E-03 | -0.46 | 2.90E-06 |
| EXOSC9  | -0.20 | 4.96E-03 | -0.21 | 1.70E-03 |
| GNAI3   | -0.20 | 5.06E-03 | -0.41 | 2.48E-10 |
| RASGRF2 | -0.47 | 5.06E-03 | -0.58 | 2.99E-03 |
| RCL1    | 0.24  | 5.10E-03 | 0.28  | 1.79E-04 |
| BTLA    | -0.56 | 5.13E-03 | -0.67 | 2.04E-04 |
| CTF1    | 0.43  | 5.15E-03 | 0.95  | 6.28E-10 |
| GZMH    | 0.58  | 5.15E-03 | 1.10  | 3.70E-08 |
| BLOC1S3 | -0.23 | 5.17E-03 | -0.22 | 9.40E-03 |

|          |       |          |       |          |
|----------|-------|----------|-------|----------|
| MAPK14   | -0.18 | 5.36E-03 | -0.15 | 1.99E-02 |
| FECH     | -0.32 | 5.36E-03 | -0.28 | 1.11E-02 |
| TPM1     | -0.34 | 5.44E-03 | -0.37 | 5.98E-03 |
| MARVELD2 | -0.27 | 5.46E-03 | -0.25 | 4.99E-03 |
| RHOC     | -0.33 | 5.49E-03 | -0.46 | 1.99E-05 |
| CDHR1    | 0.68  | 5.50E-03 | 0.87  | 1.07E-03 |
| OTUD7A   | 0.58  | 5.57E-03 | 0.94  | 3.25E-05 |
| GLG1     | -0.20 | 5.69E-03 | -0.37 | 8.01E-08 |
| GPR174   | -0.61 | 5.75E-03 | -0.72 | 5.51E-05 |
| TMED1    | -0.25 | 5.76E-03 | -0.22 | 5.84E-03 |
| KCNQ1    | 0.52  | 5.85E-03 | 0.89  | 1.76E-05 |
| BMP5     | 0.67  | 5.88E-03 | 1.67  | 4.01E-12 |
| RASA1    | -0.25 | 5.88E-03 | -0.32 | 4.42E-04 |
| DISC1    | -0.34 | 5.89E-03 | -0.53 | 5.90E-06 |
| KLHL25   | -0.34 | 6.12E-03 | -0.32 | 1.40E-02 |
| SLC25A4  | 0.29  | 6.13E-03 | 0.56  | 6.47E-06 |
| CD72     | -0.43 | 6.16E-03 | -0.61 | 4.66E-05 |
| ULBP3    | -0.44 | 6.27E-03 | -0.74 | 3.63E-07 |
| MYH15    | 0.74  | 6.34E-03 | 1.26  | 4.27E-08 |
| PIBF1    | -0.26 | 6.35E-03 | -0.18 | 3.31E-02 |
| AP2B1    | -0.22 | 6.38E-03 | -0.36 | 1.10E-06 |
| SPHK1    | -0.55 | 6.49E-03 | -0.68 | 1.25E-03 |
| ANKRD17  | -0.22 | 6.54E-03 | -0.28 | 7.56E-06 |
| SMCHD1   | -0.27 | 6.56E-03 | -0.19 | 2.07E-02 |
| FDX1     | 0.27  | 6.64E-03 | 0.33  | 1.91E-04 |
| CLCN3    | -0.28 | 6.66E-03 | -0.39 | 6.27E-07 |
| SIAH1    | -0.18 | 6.67E-03 | -0.16 | 3.44E-02 |
| RAB18    | -0.21 | 6.68E-03 | -0.23 | 3.09E-03 |
| ADORA3   | -0.48 | 6.69E-03 | -0.74 | 2.21E-04 |
| IKZF5    | 0.20  | 6.69E-03 | 0.30  | 2.63E-04 |
| AKAP9    | 0.26  | 6.76E-03 | 0.25  | 7.69E-03 |
| NUP153   | -0.25 | 6.77E-03 | -0.32 | 1.12E-05 |
| RNASEK   | 0.23  | 6.93E-03 | 0.34  | 3.30E-05 |
| NCOA2    | -0.38 | 6.94E-03 | -0.29 | 8.32E-03 |
| SERTAD2  | -0.25 | 6.98E-03 | -0.25 | 6.86E-03 |
| ITGB7    | -0.38 | 6.99E-03 | -0.49 | 3.35E-04 |
| CD180    | -0.45 | 7.00E-03 | -1.12 | 1.38E-10 |
| GCA      | 0.28  | 7.03E-03 | 0.36  | 4.15E-05 |
| OSBPL1A  | 0.32  | 7.07E-03 | 0.55  | 3.29E-10 |
| PLCB4    | 0.65  | 7.07E-03 | 1.16  | 9.96E-06 |
| ACD      | -0.24 | 7.09E-03 | -0.23 | 8.65E-03 |
| PKD1     | 0.31  | 7.22E-03 | 0.45  | 4.55E-05 |
| TLR5     | 0.35  | 7.22E-03 | 0.47  | 3.14E-04 |

|          |       |          |       |          |
|----------|-------|----------|-------|----------|
| PIGA     | 0.34  | 7.25E-03 | 0.39  | 1.11E-02 |
| SLC15A4  | -0.18 | 7.28E-03 | -0.18 | 1.01E-02 |
| GTF2I    | -0.28 | 7.52E-03 | -0.37 | 4.16E-05 |
| LGALS2   | 0.65  | 7.58E-03 | 1.04  | 3.27E-07 |
| LPAR4    | -0.68 | 7.66E-03 | -1.14 | 2.76E-05 |
| CNOT7    | -0.23 | 7.66E-03 | -0.32 | 1.74E-04 |
| CLPP     | -0.23 | 7.69E-03 | -0.23 | 1.57E-03 |
| APLP2    | 0.27  | 7.71E-03 | 0.54  | 3.73E-08 |
| TIAM2    | -0.41 | 7.90E-03 | -0.50 | 1.73E-03 |
| PSTPIP2  | -0.37 | 7.93E-03 | -0.40 | 4.25E-03 |
| GLYR1    | -0.16 | 7.95E-03 | -0.13 | 1.31E-02 |
| UPF2     | -0.21 | 8.03E-03 | -0.18 | 2.93E-02 |
| LSM14A   | -0.21 | 8.06E-03 | -0.19 | 3.80E-03 |
| ATP6V1E1 | 0.19  | 8.10E-03 | 0.21  | 4.81E-03 |
| RPTOR    | -0.24 | 8.13E-03 | -0.25 | 1.05E-03 |
| SIGLEC8  | 0.53  | 8.25E-03 | 0.82  | 6.97E-04 |
| AHCYL1   | -0.19 | 8.27E-03 | -0.17 | 7.14E-03 |
| LTF      | -0.91 | 8.28E-03 | -1.12 | 6.12E-03 |
| PARP9    | -0.24 | 8.39E-03 | -0.21 | 8.73E-04 |
| DYNC1LI2 | 0.17  | 8.42E-03 | 0.15  | 2.63E-02 |
| IL12A    | 0.50  | 8.42E-03 | 0.63  | 3.27E-03 |
| TDP2     | -0.33 | 8.43E-03 | -0.29 | 4.78E-03 |
| PPP1R14C | 0.58  | 8.43E-03 | 1.02  | 3.03E-08 |
| UQCRC2   | -0.22 | 8.46E-03 | -0.22 | 7.18E-04 |
| CTSD     | 0.32  | 8.46E-03 | 0.33  | 1.65E-02 |
| AP1B1    | -0.18 | 8.55E-03 | -0.29 | 5.68E-05 |
| SLC20A2  | -0.36 | 8.55E-03 | -0.31 | 7.47E-03 |
| NCR3     | 0.53  | 8.75E-03 | 0.54  | 3.24E-02 |
| UBE2D2   | -0.18 | 8.76E-03 | -0.29 | 8.33E-06 |
| ALCAM    | 0.35  | 8.79E-03 | 0.60  | 5.21E-07 |
| ANXA7    | -0.18 | 8.79E-03 | -0.20 | 1.64E-03 |
| DEFB4A   | -2.17 | 8.81E-03 | -2.35 | 7.12E-04 |
| SLC25A6  | -0.29 | 9.01E-03 | -0.27 | 6.83E-03 |
| MFN2     | 0.16  | 9.13E-03 | 0.12  | 3.45E-02 |
| TRIM38   | -0.19 | 9.13E-03 | -0.15 | 3.47E-02 |
| CES1     | 0.79  | 9.16E-03 | 2.71  | 6.22E-37 |
| HIP1     | 0.34  | 9.21E-03 | 0.45  | 9.88E-04 |
| LYST     | 0.27  | 9.26E-03 | 0.29  | 1.47E-02 |
| CTAGE1   | -0.46 | 9.29E-03 | -0.53 | 2.34E-03 |
| IL20     | 1.24  | 9.33E-03 | 1.53  | 2.37E-03 |
| BTRC     | -0.17 | 9.35E-03 | -0.28 | 4.24E-06 |
| HDAC9    | -0.56 | 9.45E-03 | -0.46 | 2.24E-02 |
| HGF      | 0.55  | 9.47E-03 | 0.86  | 2.26E-07 |

|          |       |          |       |          |
|----------|-------|----------|-------|----------|
| SH2B2    | -0.40 | 9.55E-03 | -0.48 | 9.56E-03 |
| PKN3     | 0.29  | 9.60E-03 | 0.59  | 1.54E-05 |
| IFITM2   | 0.32  | 9.62E-03 | 0.47  | 8.02E-05 |
| TFEB     | 0.27  | 9.79E-03 | 0.43  | 2.19E-05 |
| MAP3K11  | 0.20  | 9.82E-03 | 0.30  | 4.48E-05 |
| C21orf91 | 0.30  | 9.85E-03 | 0.27  | 2.53E-02 |
| MAK16    | -0.23 | 9.91E-03 | -0.22 | 1.21E-02 |
| KCNMA1   | 0.48  | 9.94E-03 | 0.45  | 2.76E-03 |
| CCL11    | -0.69 | 1.00E-02 | -0.73 | 6.59E-03 |
| SFTPB    | 0.70  | 1.02E-02 | 2.27  | 1.03E-09 |
| LRRFIP2  | 0.16  | 1.03E-02 | 0.26  | 4.38E-06 |
| HDAC5    | 0.22  | 1.03E-02 | 0.38  | 2.81E-07 |
| LEP      | -1.77 | 1.03E-02 | -3.21 | 4.10E-11 |
| DAPP1    | -0.40 | 1.04E-02 | -0.56 | 1.64E-04 |
| DCTN1    | 0.20  | 1.08E-02 | 0.26  | 1.60E-05 |
| VCAM1    | -0.47 | 1.08E-02 | -1.15 | 1.11E-08 |
| RAB4B    | 0.23  | 1.09E-02 | 0.36  | 8.94E-05 |
| RIOK3    | -0.22 | 1.09E-02 | -0.17 | 4.52E-02 |
| VEGFC    | 0.49  | 1.10E-02 | 0.63  | 6.08E-05 |
| PLSCR1   | -0.30 | 1.11E-02 | -0.28 | 3.24E-03 |
| GUCY1B3  | 0.31  | 1.12E-02 | 0.37  | 1.42E-03 |
| FUZ      | 0.27  | 1.12E-02 | 0.37  | 3.03E-03 |
| PSMB1    | -0.25 | 1.14E-02 | -0.30 | 1.59E-04 |
| GLTSCR2  | 0.24  | 1.15E-02 | 0.39  | 5.12E-05 |
| RSAD2    | 0.43  | 1.16E-02 | 0.53  | 3.00E-03 |
| AP3B1    | -0.16 | 1.17E-02 | -0.34 | 1.48E-08 |
| PAF1     | -0.21 | 1.17E-02 | -0.17 | 8.39E-03 |
| PYCARD   | 0.38  | 1.18E-02 | 0.56  | 6.67E-06 |
| TMPRSS2  | 0.49  | 1.19E-02 | 1.36  | 2.12E-08 |
| CRADD    | 0.29  | 1.21E-02 | 0.36  | 7.52E-04 |
| NINJ1    | -0.27 | 1.22E-02 | -0.28 | 5.90E-03 |
| HFE      | -0.31 | 1.23E-02 | -0.41 | 4.12E-04 |
| TLR3     | 0.40  | 1.24E-02 | 0.64  | 2.56E-06 |
| MAP3K1   | -0.23 | 1.24E-02 | -0.25 | 2.20E-03 |
| RELB     | -0.28 | 1.25E-02 | -0.51 | 3.72E-05 |
| EPN1     | -0.21 | 1.25E-02 | -0.18 | 4.68E-02 |
| ATP6V1D  | -0.19 | 1.25E-02 | -0.23 | 3.83E-03 |
| EIF5A2   | -0.37 | 1.26E-02 | -0.45 | 6.52E-04 |
| DLD      | -0.22 | 1.27E-02 | -0.26 | 2.44E-04 |
| BTN3A1   | 0.26  | 1.29E-02 | 0.29  | 2.62E-03 |
| ALPP     | 0.92  | 1.33E-02 | 3.79  | 8.46E-20 |
| DCK      | -0.27 | 1.35E-02 | -0.32 | 7.95E-04 |
| LGALS3   | 0.33  | 1.38E-02 | 0.52  | 1.63E-05 |

|          |       |          |       |          |
|----------|-------|----------|-------|----------|
| ATP5L    | -0.26 | 1.38E-02 | -0.19 | 3.46E-02 |
| SIPA1    | -0.22 | 1.39E-02 | -0.17 | 3.99E-02 |
| ECE1     | -0.28 | 1.40E-02 | -0.31 | 1.77E-02 |
| FLNB     | -0.27 | 1.40E-02 | -0.31 | 5.58E-03 |
| RLIM     | -0.17 | 1.41E-02 | -0.26 | 9.83E-05 |
| SOS1     | -0.18 | 1.43E-02 | -0.28 | 1.25E-05 |
| ZNF496   | -0.24 | 1.44E-02 | -0.21 | 3.65E-02 |
| C16orf62 | -0.18 | 1.46E-02 | -0.26 | 6.48E-06 |
| FDFT1    | 0.27  | 1.46E-02 | 0.34  | 8.44E-03 |
| TRIM13   | 0.19  | 1.49E-02 | 0.24  | 3.68E-03 |
| POU2F2   | -0.43 | 1.49E-02 | -0.80 | 1.12E-06 |
| ABCC6    | 0.43  | 1.49E-02 | 1.41  | 6.30E-17 |
| SPIB     | -0.67 | 1.50E-02 | -1.14 | 8.42E-06 |
| KEAP1    | -0.22 | 1.51E-02 | -0.17 | 2.35E-02 |
| SLCO1C1  | 0.49  | 1.52E-02 | 0.60  | 2.64E-02 |
| ANXA2    | 0.29  | 1.53E-02 | 0.28  | 8.71E-03 |
| ACOX1    | -0.19 | 1.55E-02 | -0.14 | 3.93E-02 |
| XYLT1    | -0.43 | 1.55E-02 | -0.53 | 3.97E-03 |
| FBXL22   | -0.32 | 1.58E-02 | -0.42 | 8.64E-03 |
| PKNOX1   | -0.14 | 1.58E-02 | -0.13 | 1.99E-02 |
| TMEM43   | 0.20  | 1.61E-02 | 0.22  | 6.28E-03 |
| BCL10    | -0.24 | 1.61E-02 | -0.39 | 5.27E-04 |
| DCAF7    | -0.16 | 1.61E-02 | -0.26 | 4.28E-05 |
| SLC34A2  | 0.54  | 1.63E-02 | 1.16  | 3.21E-06 |
| KIF21B   | -0.38 | 1.64E-02 | -0.29 | 4.42E-02 |
| FUT4     | -0.30 | 1.67E-02 | -0.34 | 1.64E-03 |
| MPRIP    | 0.24  | 1.68E-02 | 0.41  | 1.33E-05 |
| CIZ1     | -0.17 | 1.70E-02 | -0.20 | 1.96E-03 |
| SLC17A5  | 0.22  | 1.71E-02 | 0.25  | 1.20E-03 |
| CHUK     | -0.18 | 1.74E-02 | -0.30 | 4.42E-06 |
| BAG4     | -0.30 | 1.74E-02 | -0.37 | 6.40E-04 |
| NLRP1    | 0.36  | 1.75E-02 | 0.74  | 1.33E-06 |
| PSEN2    | -0.20 | 1.77E-02 | -0.23 | 4.97E-03 |
| RNF6     | 0.16  | 1.81E-02 | 0.16  | 9.82E-03 |
| RNASE1   | 0.48  | 1.81E-02 | 1.21  | 6.13E-08 |
| POMC     | 0.60  | 1.83E-02 | 0.68  | 2.55E-04 |
| ODF3B    | 0.36  | 1.85E-02 | 0.81  | 9.07E-07 |
| STAT6    | 0.19  | 1.85E-02 | 0.36  | 8.98E-07 |
| GLIS2    | 0.26  | 1.87E-02 | 0.41  | 4.89E-03 |
| STEAP4   | 0.50  | 1.94E-02 | 0.95  | 4.72E-05 |
| CCL8     | -0.61 | 1.94E-02 | -0.75 | 5.65E-03 |
| EXOSC6   | -0.21 | 1.96E-02 | -0.21 | 3.17E-03 |
| IFIH1    | -0.31 | 1.98E-02 | -0.23 | 1.60E-02 |

|          |       |          |       |          |
|----------|-------|----------|-------|----------|
| ULBP1    | 0.47  | 1.98E-02 | 0.53  | 1.38E-02 |
| HTT      | 0.20  | 1.99E-02 | 0.33  | 2.76E-05 |
| PPP1CB   | -0.18 | 2.00E-02 | -0.26 | 6.29E-04 |
| UBE2J1   | -0.17 | 2.01E-02 | -0.36 | 6.32E-08 |
| PRPF38A  | -0.15 | 2.02E-02 | -0.17 | 7.92E-03 |
| DYNLL1   | -0.21 | 2.04E-02 | -0.20 | 3.08E-02 |
| SEMA3E   | 0.66  | 2.04E-02 | 1.91  | 4.53E-11 |
| LY9      | -0.42 | 2.06E-02 | -0.49 | 9.77E-03 |
| RYK      | -0.19 | 2.07E-02 | -0.20 | 1.82E-02 |
| GALNS    | -0.23 | 2.08E-02 | -0.19 | 2.30E-02 |
| SERINC5  | 0.35  | 2.09E-02 | 0.28  | 1.03E-02 |
| GP1BA    | 0.46  | 2.11E-02 | 0.60  | 1.67E-02 |
| RRM2B    | 0.24  | 2.17E-02 | 0.34  | 2.09E-03 |
| FBXO9    | 0.19  | 2.19E-02 | 0.38  | 1.52E-06 |
| UBE2N    | -0.21 | 2.21E-02 | -0.18 | 3.40E-02 |
| SIGLEC10 | -0.42 | 2.23E-02 | -0.44 | 1.46E-02 |
| ALAD     | 0.18  | 2.24E-02 | 0.32  | 9.96E-06 |
| CCDC115  | 0.16  | 2.24E-02 | 0.22  | 2.97E-03 |
| C4BPA    | 0.68  | 2.26E-02 | 2.52  | 6.66E-13 |
| S1PR3    | -0.34 | 2.31E-02 | -0.43 | 1.57E-04 |
| ASB5     | 0.80  | 2.35E-02 | 1.07  | 5.25E-03 |
| PIK3CB   | -0.19 | 2.36E-02 | -0.34 | 7.62E-05 |
| RBP1     | 0.43  | 2.39E-02 | 0.59  | 4.44E-04 |
| RNF128   | 0.54  | 2.41E-02 | 1.84  | 5.02E-12 |
| MUC17    | -4.11 | 2.42E-02 | -1.11 | 2.14E-02 |
| DYNLL2   | -0.19 | 2.42E-02 | -0.23 | 2.81E-03 |
| GLA      | -0.27 | 2.44E-02 | -0.33 | 6.22E-04 |
| GLCE     | -0.26 | 2.44E-02 | -0.34 | 3.01E-04 |
| KLRK1    | 0.44  | 2.48E-02 | 0.96  | 7.58E-08 |
| RAB3GAP1 | -0.13 | 2.52E-02 | -0.17 | 2.88E-03 |
| TXK      | 0.41  | 2.54E-02 | 0.84  | 5.94E-06 |
| COL6A1   | -0.36 | 2.55E-02 | -0.52 | 2.14E-03 |
| CXCR3    | -0.42 | 2.56E-02 | -0.43 | 1.24E-02 |
| CHRNA1   | -0.69 | 2.58E-02 | -0.98 | 1.15E-02 |
| TRIM63   | 0.80  | 2.58E-02 | 1.88  | 1.65E-08 |
| COMMD3   | -0.23 | 2.58E-02 | -0.24 | 1.62E-02 |
| UBA3     | -0.17 | 2.59E-02 | -0.19 | 1.30E-02 |
| PFN1     | -0.18 | 2.60E-02 | -0.20 | 4.74E-03 |
| TNFAIP6  | -0.44 | 2.61E-02 | -0.81 | 7.43E-05 |
| NPC1     | 0.23  | 2.62E-02 | 0.32  | 9.76E-04 |
| USP8     | 0.16  | 2.63E-02 | 0.18  | 5.11E-03 |
| RHOT1    | 0.16  | 2.67E-02 | 0.24  | 5.03E-04 |
| CIITA    | 0.35  | 2.69E-02 | 0.60  | 2.20E-04 |



|          |       |          |       |          |
|----------|-------|----------|-------|----------|
| RGS4     | -0.56 | 2.70E-02 | -0.99 | 9.01E-05 |
| MYH14    | 0.31  | 2.72E-02 | 0.80  | 1.25E-07 |
| HECTD1   | -0.21 | 2.75E-02 | -0.14 | 4.28E-02 |
| RASA4    | 0.28  | 2.78E-02 | 0.47  | 1.54E-04 |
| SEMA3C   | -0.37 | 2.78E-02 | -0.42 | 1.02E-02 |
| COG8     | -0.14 | 2.81E-02 | -0.23 | 3.09E-04 |
| EIF2AK4  | -0.16 | 2.81E-02 | -0.24 | 4.02E-04 |
| PLXND1   | 0.27  | 2.82E-02 | 0.35  | 1.72E-03 |
| LANCL2   | -0.23 | 2.82E-02 | -0.31 | 3.97E-03 |
| TBX21    | 0.50  | 2.82E-02 | 1.19  | 8.53E-09 |
| FOLR1    | 0.56  | 2.86E-02 | 2.00  | 2.35E-08 |
| MS4A1    | -0.69 | 2.88E-02 | -1.48 | 3.23E-05 |
| MAST4    | 0.32  | 2.88E-02 | 0.37  | 1.63E-03 |
| APLF     | -0.24 | 2.92E-02 | -0.34 | 1.35E-03 |
| PHLDA1   | -0.38 | 2.94E-02 | -0.41 | 3.04E-02 |
| CD48     | 0.37  | 2.94E-02 | 0.34  | 4.78E-02 |
| MMP2     | -0.36 | 2.94E-02 | -0.65 | 5.91E-05 |
| KBTBD6   | -0.21 | 2.97E-02 | -0.21 | 3.24E-02 |
| ICAM5    | 0.48  | 2.97E-02 | 1.78  | 1.08E-11 |
| DUOXA2   | 0.70  | 2.99E-02 | 2.37  | 5.65E-17 |
| IL1RAP   | -0.34 | 3.00E-02 | -0.38 | 1.53E-02 |
| MUC15    | 0.59  | 3.03E-02 | 1.32  | 8.96E-06 |
| CUL1     | -0.13 | 3.06E-02 | -0.21 | 4.73E-04 |
| MED12    | -0.19 | 3.11E-02 | -0.30 | 1.27E-03 |
| CEBPE    | 0.54  | 3.12E-02 | 0.52  | 9.97E-03 |
| ST3GAL4  | -0.33 | 3.12E-02 | -0.31 | 9.88E-03 |
| PDLIM5   | -0.25 | 3.14E-02 | -0.50 | 3.23E-06 |
| UBE2E1   | -0.19 | 3.16E-02 | -0.20 | 1.23E-02 |
| RCAN2    | 0.41  | 3.17E-02 | 0.78  | 5.00E-08 |
| SAMD9L   | 0.33  | 3.26E-02 | 0.54  | 6.23E-04 |
| CASP4    | -0.24 | 3.26E-02 | -0.25 | 4.76E-03 |
| TOR1A    | -0.14 | 3.27E-02 | -0.25 | 2.60E-05 |
| BBS5     | 0.21  | 3.27E-02 | 0.33  | 1.89E-03 |
| GATA3    | 0.43  | 3.27E-02 | 0.64  | 7.92E-05 |
| TECPR1   | 0.24  | 3.28E-02 | 0.38  | 4.81E-05 |
| KALRN    | 0.34  | 3.40E-02 | 0.33  | 4.37E-02 |
| UXS1     | 0.17  | 3.41E-02 | 0.36  | 1.18E-05 |
| NSA2     | -0.22 | 3.43E-02 | -0.21 | 1.02E-02 |
| RAB43    | -0.21 | 3.44E-02 | -0.21 | 2.15E-02 |
| PPARGC1A | 0.60  | 3.45E-02 | 1.92  | 6.79E-12 |
| BTN2A2   | 0.19  | 3.46E-02 | 0.38  | 8.02E-05 |
| MICA     | 0.24  | 3.47E-02 | 0.33  | 1.15E-03 |
| HLA-C    | 0.27  | 3.47E-02 | 0.30  | 1.47E-03 |

|         |       |          |       |          |
|---------|-------|----------|-------|----------|
| CLECL1  | -0.41 | 3.48E-02 | -0.66 | 4.41E-03 |
| DNAJC6  | -0.42 | 3.57E-02 | -0.42 | 1.94E-02 |
| JAG1    | 0.34  | 3.59E-02 | 0.29  | 3.07E-02 |
| GABARAP | 0.17  | 3.61E-02 | 0.23  | 1.89E-03 |
| MYO18A  | -0.25 | 3.64E-02 | -0.19 | 4.51E-02 |
| ST6GAL1 | -0.30 | 3.65E-02 | -0.26 | 1.24E-02 |
| RPS6KA3 | -0.21 | 3.67E-02 | -0.19 | 3.29E-02 |
| REN     | 0.58  | 3.70E-02 | 1.31  | 1.50E-06 |
| ADH5    | 0.19  | 3.76E-02 | 0.20  | 1.92E-02 |
| ADAM17  | 0.20  | 3.76E-02 | 0.20  | 1.51E-02 |
| ANKRD2  | 0.55  | 3.78E-02 | 0.65  | 1.88E-02 |
| PJA1    | -0.18 | 3.80E-02 | -0.37 | 1.83E-07 |
| PKN1    | 0.18  | 3.80E-02 | 0.19  | 4.08E-03 |
| FKBP8   | 0.17  | 3.82E-02 | 0.31  | 2.53E-06 |
| GLI2    | -0.35 | 3.82E-02 | -0.44 | 5.04E-03 |
| ACTR2   | -0.12 | 3.82E-02 | -0.35 | 3.96E-09 |
| NLRP12  | 0.51  | 3.84E-02 | 0.82  | 1.93E-03 |
| SIT1    | -0.41 | 3.86E-02 | -0.46 | 1.39E-02 |
| CH25H   | 0.48  | 3.92E-02 | 0.66  | 1.12E-02 |
| NRL     | 0.24  | 3.92E-02 | 0.49  | 8.38E-05 |
| ATP5F1  | -0.18 | 3.92E-02 | -0.27 | 9.38E-04 |
| ATN1    | 0.18  | 3.93E-02 | 0.34  | 3.93E-04 |
| ERCC4   | -0.16 | 3.95E-02 | -0.30 | 3.03E-04 |
| CD28    | -0.34 | 4.04E-02 | -0.73 | 4.77E-05 |
| CSK     | -0.15 | 4.09E-02 | -0.32 | 5.31E-06 |
| NR1H3   | 0.23  | 4.09E-02 | 0.25  | 2.55E-02 |
| H2AFY2  | -0.41 | 4.18E-02 | -0.48 | 6.30E-03 |
| CHRM3   | 0.59  | 4.21E-02 | 1.68  | 1.50E-07 |
| UBOX5   | 0.17  | 4.22E-02 | 0.22  | 7.35E-03 |
| DDX21   | -0.24 | 4.22E-02 | -0.45 | 1.76E-05 |
| SIRT2   | 0.18  | 4.23E-02 | 0.24  | 2.16E-04 |
| PAX5    | -0.63 | 4.24E-02 | -2.21 | 1.11E-10 |
| MAP4K2  | 0.22  | 4.26E-02 | 0.33  | 7.47E-04 |
| RAG1    | 0.41  | 4.27E-02 | 0.72  | 5.68E-05 |
| FGF18   | 0.53  | 4.31E-02 | 1.75  | 9.87E-11 |
| NHLRC3  | 0.15  | 4.32E-02 | 0.26  | 1.61E-03 |
| IL18    | 0.31  | 4.34E-02 | 0.38  | 1.56E-02 |
| SECTM1  | 0.34  | 4.34E-02 | 0.73  | 7.76E-08 |
| MAPK9   | -0.18 | 4.37E-02 | -0.18 | 1.90E-03 |
| DAZ1    | -1.41 | 4.38E-02 | -2.05 | 8.57E-06 |
| GNA15   | -0.26 | 4.42E-02 | -0.38 | 3.90E-04 |
| ITGA7   | 0.28  | 4.48E-02 | 0.55  | 3.75E-04 |
| PHF10   | 0.16  | 4.55E-02 | 0.19  | 3.07E-02 |

|          |       |          |       |          |
|----------|-------|----------|-------|----------|
| GNB2     | -0.18 | 4.56E-02 | -0.18 | 1.68E-02 |
| PDE4A    | 0.20  | 4.63E-02 | 0.25  | 3.66E-02 |
| CLEC5A   | -0.40 | 4.67E-02 | -0.65 | 1.93E-03 |
| KLHL11   | -0.27 | 4.68E-02 | -0.37 | 5.20E-03 |
| GTF2H2   | -0.39 | 4.76E-02 | -0.56 | 2.79E-03 |
| ACTN1    | -0.22 | 4.78E-02 | -0.36 | 2.64E-03 |
| TCF7L2   | 0.17  | 4.79E-02 | 0.35  | 2.67E-04 |
| CDKN2D   | 0.22  | 4.81E-02 | 0.32  | 6.30E-03 |
| ANKRD13A | 0.16  | 4.84E-02 | 0.30  | 1.90E-03 |
| HIRIP3   | 0.18  | 4.92E-02 | 0.37  | 7.02E-06 |
| IGFALS   | 0.54  | 4.97E-02 | 2.54  | 6.04E-16 |

---

**Supplementary Table 3. Univariate Cox proportional hazard regression results for significant DEGs (FDR<0.05).**

| <b>Chromosome</b> | <b>Gene</b> | <b>HR (95% CI)</b> | <b>P value</b> | <b>FDR</b> |
|-------------------|-------------|--------------------|----------------|------------|
| 12p11.23          | ARNTL2      | 1.35 (1.19-1.53)   | 4.45E-06       | 3.65E-03   |
| 15q15.1           | PLA2G4F     | 0.83 (0.77-0.90)   | 7.82E-06       | 3.65E-03   |
| 10q24.32          | CYP17A1     | 0.91 (0.86-0.95)   | 5.49E-05       | 1.71E-02   |
| 8p21.3            | LOXL2       | 1.31 (1.15-1.51)   | 8.39E-05       | 1.76E-02   |
| 3p22.1            | VIPR1       | 0.81 (0.73-0.90)   | 9.40E-05       | 1.76E-02   |
| 1p34.3            | GJB3        | 1.16 (1.08-1.26)   | 1.38E-04       | 2.14E-02   |
| 12p13.31          | GAPDH       | 1.56 (1.24-1.96)   | 1.67E-04       | 2.21E-02   |
| 3p21.31           | CACNA2D2    | 0.88 (0.82-0.94)   | 1.92E-04       | 2.21E-02   |
| 5q34              | HMMR        | 1.32 (1.14-1.53)   | 2.13E-04       | 2.21E-02   |
| 15q22.31          | DAPK2       | 0.74 (0.63-0.87)   | 2.56E-04       | 2.40E-02   |
| 5q35.1            | NKX2-5      | 1.09 (1.04-1.15)   | 3.23E-04       | 2.64E-02   |
| 4p16.3            | TACC3       | 1.44 (1.18-1.75)   | 3.71E-04       | 2.64E-02   |
| 13q12.11          | GJB2        | 1.20 (1.08-1.32)   | 3.86E-04       | 2.64E-02   |
| 18q12.1           | DSG3        | 1.10 (1.04-1.16)   | 4.09E-04       | 2.64E-02   |
| 14q23.1           | SIX1        | 0.84 (0.77-0.93)   | 4.24E-04       | 2.64E-02   |
| 3p21.31           | COL7A1      | 1.15 (1.06-1.25)   | 5.15E-04       | 2.85E-02   |
| 19q13.31          | LYPD3       | 1.17 (1.07-1.28)   | 5.19E-04       | 2.85E-02   |
| 5q13.2            | CCNB1       | 1.34 (1.13-1.58)   | 6.80E-04       | 3.53E-02   |
| 1p13.3            | SLC6A17     | 1.14 (1.06-1.23)   | 7.69E-04       | 3.74E-02   |
| 18q21.32          | MC4R        | 0.91 (0.86-0.96)   | 8.00E-04       | 3.74E-02   |
| 16p12.2           | PLK1        | 1.27 (1.10-1.45)   | 8.69E-04       | 3.86E-02   |
| 16q11.2           | SHCBP1      | 1.29 (1.11-1.50)   | 9.39E-04       | 3.94E-02   |
| 8q21.11           | TRPA1       | 1.13 (1.05-1.21)   | 9.70E-04       | 3.94E-02   |
| 12p13.33          | FOXM1       | 1.24 (1.09-1.41)   | 1.04E-03       | 4.05E-02   |
| 6q25.1            | RAET1L      | 1.07 (1.03-1.12)   | 1.12E-03       | 4.20E-02   |
| 6p21.31           | HMGA1       | 1.35 (1.13-1.62)   | 1.18E-03       | 4.25E-02   |
| 14q22.2           | CDKN3       | 1.25 (1.09-1.43)   | 1.30E-03       | 4.25E-02   |
| 1q21.3            | S100A7      | 1.06 (1.02-1.10)   | 1.38E-03       | 4.25E-02   |
| 17q21.2           | KRT16       | 1.10 (1.04-1.17)   | 1.38E-03       | 4.25E-02   |
| 1p34.2            | SLC2A1      | 1.24 (1.09-1.41)   | 1.44E-03       | 4.25E-02   |
| 9q31.2            | KLF4        | 1.28 (1.10-1.49)   | 1.47E-03       | 4.25E-02   |
| 21q22.3           | HSF2BP      | 1.30 (1.11-1.53)   | 1.48E-03       | 4.25E-02   |
| 4q27              | CCNA2       | 1.26 (1.09-1.45)   | 1.50E-03       | 4.25E-02   |
| 20q11.21          | TPX2        | 1.22 (1.08-1.39)   | 1.61E-03       | 4.39E-02   |
| 12q14.3           | GRIP1       | 1.21 (1.08-1.37)   | 1.69E-03       | 4.39E-02   |
| 2q35              | PTPRN       | 1.10 (1.03-1.16)   | 1.69E-03       | 4.39E-02   |
| 17q21.32          | IGF2BP1     | 1.07 (1.03-1.12)   | 1.79E-03       | 4.52E-02   |
| 1p36.12           | CDA         | 1.13 (1.05-1.22)   | 1.84E-03       | 4.52E-02   |

|         |       |                  |          |          |
|---------|-------|------------------|----------|----------|
| 18q21.1 | MAPK4 | 1.10 (1.04-1.17) | 2.01E-03 | 4.82E-02 |
| 3q24    | PLOD2 | 1.23 (1.08-1.40) | 2.14E-03 | 4.99E-02 |
| 17q21.2 | KRT14 | 1.07 (1.03-1.13) | 2.19E-03 | 4.99E-02 |

---
